# Supplementary material for: Lhx2 is a progenitor-intrinsic modulator of Sonic Hedgehog signaling during early retinal neurogenesis
Source: eLife. 2022 Dec 2;11:e78342. doi: 10.7554/eLife.78342 (PMC9718532; doi:10.7554/eLife.78342)
Supplement: Supplementary file 1. [file elife-78342-supp1.xlsx]

## Sheet: Suppl_Table_1
rank	ensemblid	mgi_symbol	mgi_biotype	baseMean	log2FoldChange	lfcSE	stat	pvalue	padj	Lhx2_cKO / 10552X5	Lhx2_cKO / 10552X6	Lhx2_cKO / 10552X7	Lhx2_cKO / 10552X8	Control / 10552X1	Control / 10552X2	Control / 10552X3	Control / 10552X4
1	ENSMUSG00000026989	Dapl1	protein_coding	807.071	-5.25025	0.149201	-35.189	2.94e-271	4.09e-267	42	56	43	35	1404	1411	1648	1507
2	ENSMUSG00000026147	Col9a1	protein_coding	1489.57	-3.49652	0.103873	-33.6615	2.12e-248	1.47e-244	247	295	251	233	2992	2813	2249	2403
3	ENSMUSG00000021239	Vsx2	protein_coding	4107.57	-2.73219	0.08628	-31.6665	4.49e-220	2.08e-216	1106	1359	1090	994	7495	6585	6367	6799
4	ENSMUSG00000067879	Vxn	protein_coding	1295.4	1.85546	0.0673363	27.5551	3.84e-167	1.33e-163	2583	2417	1859	1829	554	588	463	538
5	ENSMUSG00000075707	Dio3	protein_coding	371.569	-4.61852	0.186417	-24.7752	1.66e-135	4.61e-132	25	35	35	28	891	652	591	596
6	ENSMUSG00000031073	Fgf15	protein_coding	8757.16	-2.77233	0.112499	-24.6431	4.36e-134	1.01e-130	2031	2865	2236	2269	16923	13854	12648	15012
7	ENSMUSG00000053399	Adamts18	protein_coding	451.849	2.68524	0.1097	24.4779	2.54e-132	5.04e-129	1051	845	665	785	122	126	108	108
8	ENSMUSG00000025407	Gli1	protein_coding	1032.7	-1.84629	0.083052	-22.2305	1.74e-109	3.03e-106	588	476	436	416	1529	1601	1555	1463
9	ENSMUSG00000034898	Filip1	protein_coding	1191.82	2.36873	0.108883	21.7549	6.21e-105	9.58e-102	2644	2305	1991	1617	433	378	261	412
10	ENSMUSG00000019960	Dusp6	protein_coding	648.111	-1.90271	0.0915823	-20.7759	7.15e-96	9.93e-93	293	337	252	279	1032	915	936	1015
11	ENSMUSG00000043531	Sorcs1	protein_coding	852.615	-2.01038	0.103034	-19.5117	8.73e-85	1.1e-81	362	424	342	311	1410	1377	1011	1436
12	ENSMUSG00000024076	Vit	protein_coding	279.999	2.3912	0.127379	18.7723	1.27e-78	1.47e-75	638	501	405	469	101	82	69	91
13	ENSMUSG00000039239	Tgfb2	protein_coding	686.641	-1.58174	0.0844878	-18.7215	3.31e-78	3.53e-75	391	401	327	342	1063	989	824	1060
14	ENSMUSG00000045005	Fzd5	protein_coding	2469.08	-1.37615	0.0736264	-18.6909	5.87e-78	5.82e-75	1571	1619	1309	1333	3769	3428	2775	3676
15	ENSMUSG00000013089	Etv5	protein_coding	1518.58	-1.83967	0.101572	-18.1119	2.57e-73	2.38e-70	646	850	678	627	2277	2148	2134	2495
16	ENSMUSG00000035357	Pdzrn3	protein_coding	869.359	-1.33244	0.0753139	-17.6919	4.85e-70	4.21e-67	566	591	496	448	1267	1208	1077	1197
17	ENSMUSG00000040274	Cdk6	protein_coding	757.678	-1.77513	0.101376	-17.5105	1.19e-68	9.74e-66	363	450	330	314	1104	1182	930	1269
18	ENSMUSG00000028645	Slc2a1	protein_coding	7251.63	-1.02321	0.0605213	-16.9065	4.03e-64	3.11e-61	5849	5344	4465	4684	10151	9047	9013	8836
19	ENSMUSG00000030905	Crym	protein_coding	167.08	-5.68959	0.340168	-16.7258	8.5e-63	6.21e-60	6	8	7	6	224	281	407	324
20	ENSMUSG00000038400	Pmepa1	protein_coding	2015.12	-1.29444	0.0778015	-16.6378	3.71e-62	2.58e-59	1309	1491	1097	1073	2760	2622	2769	2746
21	ENSMUSG00000054252	Fgfr3	protein_coding	292.153	2.17759	0.131359	16.5774	1.02e-61	6.72e-59	702	513	401	446	123	95	84	103
22	ENSMUSG00000038156	Spon1	protein_coding	319.105	-1.9788	0.12111	-16.3388	5.22e-60	3.3e-57	184	122	110	136	550	473	419	505
23	ENSMUSG00000042745	Id1	protein_coding	733.897	-1.44692	0.0887793	-16.2979	1.02e-59	6.17e-57	424	480	384	382	1050	996	1022	1019
24	ENSMUSG00000059049	Frem1	protein_coding	661.458	-2.02475	0.124453	-16.2692	1.63e-59	9.46e-57	278	268	301	250	1001	1058	805	1200
25	ENSMUSG00000061517	Sox21	protein_coding	114.554	4.34358	0.269074	16.1427	1.28e-58	7.1e-56	277	251	174	231	14	6	13	8
26	ENSMUSG00000022528	Hes1	protein_coding	695.999	-1.53077	0.0949091	-16.1288	1.6e-58	8.56e-56	410	426	373	312	1153	930	870	999
27	ENSMUSG00000020644	Id2	protein_coding	964.975	-1.21034	0.0750567	-16.1257	1.68e-58	8.66e-56	739	684	569	497	1391	1350	1169	1234
28	ENSMUSG00000035805	Mlc1	protein_coding	188.6	3.01894	0.187745	16.0801	3.52e-58	1.75e-55	448	416	271	310	27	37	57	36
29	ENSMUSG00000060675	Pla2g16	protein_coding	330.979	-2.21528	0.138661	-15.9763	1.87e-57	8.95e-55	106	144	121	123	534	453	502	586
30	ENSMUSG00000020029	Nudt4	protein_coding	3239.82	-1.25989	0.0806368	-15.6243	4.97e-55	2.3e-52	2101	2405	1844	1761	4883	4606	3602	4400
31	ENSMUSG00000021451	Sema4d	protein_coding	1440.61	-1.23195	0.0798316	-15.4318	1e-53	4.48e-51	934	1059	794	863	1890	1902	1899	2004
32	ENSMUSG00000003153	Slc2a3	protein_coding	572.479	1.45013	0.095208	15.2312	2.2e-52	9.53e-50	1045	1005	713	820	287	268	318	294
33	ENSMUSG00000004885	Crabp2	protein_coding	1384.7	-1.3236	0.0870929	-15.1975	3.67e-52	1.55e-49	860	950	794	745	2074	1709	1867	1889
34	ENSMUSG00000014444	Piezo1	protein_coding	435.715	-1.86837	0.124065	-15.0596	2.99e-51	1.22e-48	192	192	205	198	674	732	543	663
35	ENSMUSG00000021974	Fgf9	protein_coding	485.744	-1.60763	0.106771	-15.0568	3.12e-51	1.24e-48	248	304	216	250	664	698	647	780
36	ENSMUSG00000020080	Hkdc1	protein_coding	206.144	-2.22799	0.148265	-15.027	4.88e-51	1.88e-48	101	82	65	63	275	372	298	351
37	ENSMUSG00000020000	Moxd1	protein_coding	234.231	2.6171	0.174411	15.0054	6.77e-51	2.54e-48	486	571	348	329	48	65	80	56
38	ENSMUSG00000024087	Cyp1b1	protein_coding	207.325	-2.7905	0.185993	-15.0033	6.99e-51	2.55e-48	79	60	36	51	418	262	284	427
39	ENSMUSG00000037621	Atoh8	protein_coding	270.573	-1.87109	0.126399	-14.803	1.4e-49	4.99e-47	131	125	119	117	474	361	385	400
40	ENSMUSG00000031075	Ano1	protein_coding	1792.61	-1.32954	0.0898345	-14.7999	1.47e-49	5.1e-47	1082	1120	1101	992	2658	2450	2174	2512
41	ENSMUSG00000041592	Sdk2	protein_coding	624.25	-1.31889	0.0897058	-14.7024	6.22e-49	2.11e-46	460	399	322	345	853	942	691	924
42	ENSMUSG00000020052	Ascl1	protein_coding	2581.36	-1.24049	0.0853361	-14.5365	7.11e-48	2.35e-45	1622	1873	1508	1492	3277	3572	3454	3500
43	ENSMUSG00000051251	Nhlh1	protein_coding	628.176	1.2614	0.0895693	14.0829	4.84e-45	1.56e-42	1067	1030	756	922	374	364	344	327
44	ENSMUSG00000029189	Sel1l3	protein_coding	829.232	-1.42231	0.101146	-14.062	6.5e-45	2.05e-42	439	581	442	443	1176	1178	1054	1199
45	ENSMUSG00000003623	Crot	protein_coding	949.415	-0.893038	0.0636107	-14.0391	8.98e-45	2.77e-42	821	780	602	634	1252	1167	1047	1249
46	ENSMUSG00000024987	Cyp26a1	protein_coding	391.538	-1.6867	0.120352	-14.0147	1.27e-44	3.83e-42	229	216	185	161	531	555	640	540
47	ENSMUSG00000036390	Gadd45a	protein_coding	1601.52	-0.817886	0.0589472	-13.8749	8.99e-44	2.66e-41	1449	1327	1039	1132	2094	2018	1686	2013
48	ENSMUSG00000070348	Ccnd1	protein_coding	32704.4	-1.16914	0.0844635	-13.8419	1.42e-43	4.12e-41	21037	23863	19274	20788	44870	42505	36686	49150
49	ENSMUSG00000017724	Etv4	protein_coding	116.914	-3.06591	0.221739	-13.8267	1.76e-43	4.99e-41	26	32	23	25	158	182	232	219
50	ENSMUSG00000049908	Gja8	protein_coding	208.458	2.0082	0.147006	13.6606	1.74e-42	4.85e-40	391	383	287	357	61	90	77	88
51	ENSMUSG00000026773	Pfkfb3	protein_coding	1602.03	1.02962	0.0754143	13.6529	1.94e-42	5.29e-40	2938	2515	1769	2029	982	1088	881	1074
52	ENSMUSG00000030084	Plxna1	protein_coding	3921.48	0.643598	0.0476075	13.5188	1.21e-41	3.23e-39	6113	5496	4320	4509	3108	2843	2609	3135
53	ENSMUSG00000047992	Fam69c	protein_coding	425.934	-1.25288	0.0941493	-13.3074	2.1e-40	5.5e-38	298	284	262	226	589	548	527	625
54	ENSMUSG00000031074	Fgf3	protein_coding	577.839	-5.04213	0.379712	-13.2788	3.07e-40	7.9e-38	15	57	40	30	1254	942	960	1132
55	ENSMUSG00000027330	Cdc25b	protein_coding	1500.64	-0.84025	0.0635181	-13.2285	6.01e-40	1.52e-37	1284	1216	1030	1041	1973	1791	1759	1817
56	ENSMUSG00000051065	Mb21d2	protein_coding	656.578	-1.20831	0.0914555	-13.212	7.48e-40	1.86e-37	451	482	358	396	866	793	852	982
57	ENSMUSG00000067586	S1pr3	protein_coding	2154.93	1.10551	0.083834	13.1868	1.04e-39	2.5e-37	3117	3648	2876	2817	1463	1291	1198	1267
58	ENSMUSG00000071847	Apcdd1	protein_coding	366.257	1.50716	0.114289	13.1873	1.04e-39	2.5e-37	659	628	470	553	230	170	143	187
59	ENSMUSG00000030551	Nr2f2	protein_coding	785.227	1.10914	0.0841956	13.1733	1.25e-39	2.94e-37	1384	1159	1035	997	541	473	381	509
60	ENSMUSG00000018217	Pmp22	protein_coding	158.514	-2.186	0.167492	-13.0514	6.24e-39	1.44e-36	56	73	50	63	222	245	268	251
61	ENSMUSG00000028222	Calb1	protein_coding	83.8797	3.4675	0.266627	13.005	1.15e-38	2.61e-36	187	184	109	177	11	15	14	13
62	ENSMUSG00000063564	Col23a1	protein_coding	1047.64	-1.22426	0.0942494	-12.9896	1.4e-38	3.14e-36	688	698	671	594	1402	1562	1285	1343
63	ENSMUSG00000021099	Six6	protein_coding	2385.58	-1.10673	0.0860045	-12.8683	6.79e-38	1.5e-35	1579	1954	1495	1388	3433	3026	2796	3190
64	ENSMUSG00000009876	Cox4i2	protein_coding	271.395	-2.02908	0.157968	-12.8449	9.19e-38	1.99e-35	106	124	114	106	357	380	485	428
65	ENSMUSG00000020135	Apc2	protein_coding	6284.39	0.67796	0.0528885	12.8187	1.29e-37	2.75e-35	10302	8701	6698	7429	4669	4618	4389	4759
66	ENSMUSG00000054555	Adam12	protein_coding	202.904	-1.90677	0.151094	-12.6198	1.64e-36	3.46e-34	84	102	82	93	279	362	267	313
67	ENSMUSG00000033022	Cdo1	protein_coding	618.589	1.07608	0.0858578	12.5333	4.91e-36	1.02e-33	1012	1002	801	763	449	373	331	368
68	ENSMUSG00000028883	Sema3a	protein_coding	779.914	1.08505	0.0866954	12.5157	6.13e-36	1.25e-33	1401	1219	909	1014	430	538	431	508
69	ENSMUSG00000045817	Zfp36l2	protein_coding	916.954	-0.929113	0.0745146	-12.4689	1.1e-35	2.22e-33	726	757	626	576	1173	1218	1023	1175
70	ENSMUSG00000020037	Rfx4	protein_coding	79.478	5.63214	0.453821	12.4105	2.29e-35	4.55e-33	232	175	114	153	1	4	4	3
71	ENSMUSG00000043850	Clrn1	protein_coding	164.507	1.88892	0.152255	12.4063	2.42e-35	4.73e-33	339	276	229	262	83	66	47	72
72	ENSMUSG00000036395	Glb1l2	protein_coding	388.197	-1.57868	0.12745	-12.3866	3.09e-35	5.96e-33	188	220	209	201	534	595	555	526
73	ENSMUSG00000008489	Elavl2	protein_coding	1592	0.844772	0.0685052	12.3315	6.13e-35	1.17e-32	2604	2538	1721	1914	1159	1056	945	1195
74	ENSMUSG00000062209	Erbb4	protein_coding	201.053	2.1763	0.17848	12.1935	3.37e-34	6.32e-32	531	335	273	289	82	81	43	74
75	ENSMUSG00000038068	Rnf144b	protein_coding	727.464	-1.43082	0.118968	-12.0269	2.57e-33	4.75e-31	387	522	425	332	1055	1096	944	950
76	ENSMUSG00000042002	Foxn4	protein_coding	2290.74	-0.775003	0.0644991	-12.0157	2.94e-33	5.37e-31	1989	1911	1601	1673	2970	2909	2502	2653
77	ENSMUSG00000096753	Fam181a	protein_coding	68.0817	3.43997	0.288199	11.9361	7.67e-33	1.38e-30	166	164	94	115	18	7	10	9
78	ENSMUSG00000023092	Fhl1	protein_coding	2147.69	-0.720931	0.0604232	-11.9314	8.12e-33	1.45e-30	1981	1906	1490	1539	2657	2378	2516	2636
79	ENSMUSG00000024867	Pip5k1b	protein_coding	357.222	-1.48636	0.124599	-11.9292	8.34e-33	1.47e-30	187	219	212	174	567	508	420	517
80	ENSMUSG00000021453	Gadd45g	protein_coding	220.932	1.44143	0.121022	11.9104	1.04e-32	1.81e-30	399	394	290	298	119	98	108	129
81	ENSMUSG00000010476	Ebf3	protein_coding	6742.93	0.841422	0.070724	11.8973	1.22e-32	2.1e-30	11796	9714	7057	8585	4960	4365	4103	5035
82	ENSMUSG00000001228	Uhrf1	protein_coding	3920.3	-0.739351	0.0622683	-11.8736	1.62e-32	2.75e-30	3353	3452	2784	2877	5188	4574	4160	4812
83	ENSMUSG00000050875	A730017C20Rik	protein_coding	1055.53	-0.891259	0.0752711	-11.8407	2.41e-32	4.03e-30	870	910	736	636	1408	1347	1182	1299
84	ENSMUSG00000024827	Gldc	protein_coding	3569.7	-0.981562	0.0832426	-11.7916	4.31e-32	7.13e-30	2516	3034	2230	2391	5115	4436	3984	4578
85	ENSMUSG00000020520	Galnt10	protein_coding	359.392	-1.44933	0.122941	-11.7888	4.46e-32	7.28e-30	187	235	192	199	499	490	435	585
86	ENSMUSG00000022629	Kif21a	protein_coding	4228.65	0.999812	0.0852168	11.7326	8.68e-32	1.4e-29	7232	6777	4627	5536	2831	2885	2054	3038
87	ENSMUSG00000087150	BC064078	transcribed_unprocessed_pseudogene	712.978	-1.32838	0.113619	-11.6915	1.41e-31	2.25e-29	403	524	390	401	915	896	1009	1058
88	ENSMUSG00000027239	Mdk	protein_coding	2425.14	-0.992912	0.0853776	-11.6297	2.91e-31	4.6e-29	1795	1929	1639	1509	3598	2861	2913	2945
89	ENSMUSG00000024431	Nr3c1	protein_coding	532.33	-1.12772	0.0971743	-11.6052	3.88e-31	6.05e-29	383	407	314	319	735	731	548	783
90	ENSMUSG00000097010	Gm26709	lincRNA	212.011	-1.68362	0.146211	-11.515	1.11e-30	1.71e-28	102	131	112	82	352	327	265	291
91	ENSMUSG00000024376	Epb41l4a	protein_coding	2084.65	0.655328	0.0569901	11.499	1.33e-30	2.04e-28	3124	3046	2272	2445	1638	1452	1452	1637
92	ENSMUSG00000022382	Wnt7b	protein_coding	775.761	2.98477	0.259593	11.4979	1.35e-30	2.04e-28	1735	1571	1142	1432	158	121	241	135
93	ENSMUSG00000028873	Cdca8	protein_coding	1815.71	-0.631939	0.0549968	-11.4905	1.47e-30	2.2e-28	1735	1659	1300	1376	2167	2071	2025	2150
94	ENSMUSG00000037936	Scarb1	protein_coding	681.346	-1.24422	0.108449	-11.4729	1.81e-30	2.67e-28	467	538	377	347	839	827	942	1039
95	ENSMUSG00000026305	Lrrfip1	protein_coding	542.012	-0.908628	0.0793235	-11.4547	2.23e-30	3.26e-28	463	436	373	334	689	676	625	708
96	ENSMUSG00000091387	Gcnt4	protein_coding	157.347	-1.75245	0.153836	-11.3917	4.6e-30	6.65e-28	70	99	73	64	260	233	200	234
97	ENSMUSG00000019978	Epb41l2	protein_coding	3211.58	-0.729148	0.0640998	-11.3752	5.56e-30	7.96e-28	2741	3038	2273	2238	4095	3789	3405	4016
98	ENSMUSG00000030000	Add2	protein_coding	5266.32	0.53816	0.0473384	11.3684	6.01e-30	8.52e-28	8173	7322	5421	5824	4228	4171	3805	4187
99	ENSMUSG00000055435	Maf	protein_coding	398.564	1.3309	0.118043	11.2748	1.75e-29	2.45e-27	823	602	453	575	251	224	178	215
100	ENSMUSG00000040010	Slc7a5	protein_coding	1181.1	-0.85248	0.075773	-11.2504	2.3e-29	3.2e-27	973	988	791	825	1404	1376	1405	1608
101	ENSMUSG00000030226	Lmo3	protein_coding	124.436	1.95749	0.174038	11.2475	2.38e-29	3.28e-27	247	243	167	190	58	44	55	37
102	ENSMUSG00000053024	Cntn2	protein_coding	10257.2	0.717506	0.064097	11.1941	4.36e-29	5.94e-27	15407	14332	11066	13434	7506	7371	6676	8072
103	ENSMUSG00000022114	Spry2	protein_coding	482.833	-1.03447	0.0924459	-11.1899	4.57e-29	6.16e-27	346	378	306	313	612	618	604	636
104	ENSMUSG00000021136	Smoc1	protein_coding	441.097	-1.04372	0.0933046	-11.1862	4.77e-29	6.37e-27	326	330	290	276	609	529	538	588
105	ENSMUSG00000038252	Ncapd2	protein_coding	4813.41	-0.498584	0.0448461	-11.1177	1.03e-28	1.36e-26	4920	4485	3766	3815	5633	5407	4946	5525
106	ENSMUSG00000001864	Aif1l	protein_coding	856.972	0.955654	0.0861385	11.0944	1.34e-28	1.75e-26	1216	1390	1077	1109	602	569	501	553
107	ENSMUSG00000075254	Heg1	protein_coding	1098.85	1.02945	0.0937609	10.9796	4.79e-28	6.22e-26	1947	1601	1351	1404	784	733	504	751
108	ENSMUSG00000040289	Hey1	protein_coding	792.801	-1.05731	0.0965254	-10.9537	6.38e-28	8.21e-26	531	645	500	503	1124	1086	897	982
109	ENSMUSG00000019982	Myb	protein_coding	3493.17	-0.711903	0.0651134	-10.9333	7.99e-28	1.02e-25	3685	2864	2381	2429	4137	4352	3667	4414
110	ENSMUSG00000008305	Tle1	protein_coding	3917.58	0.687624	0.0629192	10.9287	8.4e-28	1.06e-25	6485	5571	4059	4631	3155	2767	2698	2833
111	ENSMUSG00000042596	Tfap2d	protein_coding	409.045	1.00048	0.0916982	10.9106	1.03e-27	1.28e-25	736	638	484	485	280	271	222	270
112	ENSMUSG00000010505	Myt1	protein_coding	4173.36	0.579192	0.0531525	10.8968	1.19e-27	1.48e-25	6471	5762	4344	4820	3389	3328	2765	3310
113	ENSMUSG00000078566	Bnip3	protein_coding	1436.89	0.820027	0.0754871	10.8631	1.73e-27	2.12e-25	2408	2229	1504	1740	956	1008	994	1000
114	ENSMUSG00000036006	Ripor2	protein_coding	1115.21	0.74605	0.0692357	10.7755	4.49e-27	5.48e-25	1751	1669	1224	1331	753	796	750	879
115	ENSMUSG00000021377	Dek	protein_coding	6674.54	-0.703626	0.0653682	-10.764	5.09e-27	6.15e-25	5788	6352	4779	4702	8102	8068	6785	8665
116	ENSMUSG00000053475	Tnfaip6	protein_coding	180.585	-1.50489	0.139931	-10.7545	5.64e-27	6.76e-25	104	122	86	89	230	267	230	292
117	ENSMUSG00000052957	Gas1	protein_coding	652.219	-1.31537	0.122441	-10.7429	6.4e-27	7.6e-25	336	457	391	385	915	911	765	963
118	ENSMUSG00000022817	Itgb5	protein_coding	825.834	-1.31672	0.123475	-10.6638	1.5e-26	1.77e-24	452	598	526	417	1088	1111	1176	1103
119	ENSMUSG00000018604	Tbx3	protein_coding	454.865	-1.14708	0.108554	-10.5669	4.24e-26	4.95e-24	297	344	297	260	683	610	499	604
120	ENSMUSG00000028012	Rrh	protein_coding	215.252	-1.23406	0.11695	-10.552	4.97e-26	5.76e-24	170	148	107	125	287	306	258	303
121	ENSMUSG00000027993	Trim2	protein_coding	4753.76	0.674156	0.0639359	10.5442	5.4e-26	6.2e-24	7602	7024	5192	5256	3788	3710	2861	3661
122	ENSMUSG00000041891	Lman1	protein_coding	3624.99	-0.711051	0.067511	-10.5324	6.13e-26	6.98e-24	3349	3240	2539	2596	4850	4249	3490	4649
123	ENSMUSG00000041642	Kif21b	protein_coding	5621.3	0.559595	0.0533749	10.4842	1.02e-25	1.15e-23	8688	7913	5889	6213	4356	4445	3797	4769
124	ENSMUSG00000028546	Elavl4	protein_coding	5083.39	0.567983	0.0542369	10.4723	1.16e-25	1.3e-23	7833	7129	5221	5819	4200	3955	3358	4148
125	ENSMUSG00000006498	Ptbp1	protein_coding	4066.62	-0.767818	0.0733998	-10.4608	1.31e-25	1.45e-23	3358	3481	2911	2990	5625	4766	4318	4873
126	ENSMUSG00000029595	Lhx5	protein_coding	68.7413	3.38151	0.323436	10.455	1.39e-25	1.53e-23	224	134	80	113	16	5	14	11
127	ENSMUSG00000020467	Efemp1	protein_coding	235.909	-1.17082	0.112493	-10.408	2.28e-25	2.49e-23	167	171	142	137	325	325	291	304
128	ENSMUSG00000023868	Pde10a	protein_coding	1034.89	-0.727233	0.0701958	-10.3601	3.77e-25	4.09e-23	964	910	732	720	1261	1352	1049	1269
129	ENSMUSG00000026764	Kif5c	protein_coding	10240.4	0.604193	0.0584048	10.3449	4.41e-25	4.73e-23	14995	15118	10853	11814	7640	7896	6849	8663
130	ENSMUSG00000030223	Ptpro	protein_coding	1138.3	0.628046	0.0607124	10.3446	4.43e-25	4.73e-23	1748	1625	1263	1272	846	852	814	899
131	ENSMUSG00000018398	2021-09-08	protein_coding	1357.63	-0.667912	0.0648283	-10.3028	6.85e-25	7.26e-23	1321	1163	942	1045	1763	1521	1450	1629
132	ENSMUSG00000038526	Car14	protein_coding	223.525	-1.29042	0.125318	-10.2972	7.26e-25	7.64e-23	140	167	109	136	322	305	291	291
133	ENSMUSG00000071757	Zhx2	protein_coding	677.338	-0.940141	0.091384	-10.2878	8e-25	8.35e-23	528	519	430	490	946	885	696	879
134	ENSMUSG00000052914	Cyp2j6	protein_coding	247.105	1.15296	0.112125	10.2828	8.42e-25	8.73e-23	443	380	303	330	138	152	147	147
135	ENSMUSG00000054717	Hmgb2	protein_coding	7673.91	-0.633986	0.0620308	-10.2205	1.61e-24	1.65e-22	6695	7305	5772	5749	9080	8914	8389	9211
136	ENSMUSG00000020176	Grb10	protein_coding	11909.2	-0.785709	0.076947	-10.211	1.77e-24	1.81e-22	10804	10018	8099	8345	17359	13971	11479	14973
137	ENSMUSG00000024176	Sox8	protein_coding	569.419	-1.52676	0.149645	-10.2026	1.93e-24	1.96e-22	327	401	280	245	626	832	966	773
138	ENSMUSG00000022456	2021-09-03	protein_coding	6827.44	0.436626	0.0428454	10.1907	2.18e-24	2.2e-22	10026	9054	6989	7496	5639	5491	5175	5832
139	ENSMUSG00000034612	Chst11	protein_coding	715.064	-0.825195	0.081029	-10.1839	2.34e-24	2.34e-22	579	635	483	497	868	869	788	964
140	ENSMUSG00000043391	2510009E07Rik	protein_coding	4744.67	0.563405	0.0553361	10.1815	2.4e-24	2.38e-22	6788	6670	4978	5674	3676	3648	3361	3931
141	ENSMUSG00000005233	Spc25	protein_coding	1671.01	-0.809013	0.079581	-10.1659	2.82e-24	2.77e-22	1316	1526	1156	1157	1953	2052	1973	2126
142	ENSMUSG00000031239	Itm2a	protein_coding	1782.11	-1.06623	0.10507	-10.1478	3.39e-24	3.32e-22	1414	1354	1129	1016	3010	2236	1798	2208
143	ENSMUSG00000022762	Ncam2	protein_coding	104.114	1.91409	0.189108	10.1217	4.43e-24	4.3e-22	213	171	147	170	37	53	29	48
144	ENSMUSG00000005089	Slc1a2	protein_coding	1092.36	0.712629	0.07062	10.091	6.05e-24	5.84e-22	1813	1520	1209	1269	761	819	707	875
145	ENSMUSG00000037031	Tspan15	protein_coding	1709.4	-0.717726	0.0712494	-10.0734	7.24e-24	6.94e-22	1544	1595	1232	1145	2029	2030	2046	1987
146	ENSMUSG00000027797	Dclk1	protein_coding	4914.99	0.588686	0.0584617	10.0696	7.53e-24	7.16e-22	7569	7040	5119	5565	3825	3928	3169	4092
147	ENSMUSG00000032536	Trak1	protein_coding	694.655	0.750053	0.074591	10.0555	8.68e-24	8.21e-22	1091	1039	788	806	499	528	473	475
148	ENSMUSG00000050447	Lypd6	protein_coding	403.18	-1.06507	0.105946	-10.0529	8.92e-24	8.37e-22	305	323	271	212	494	529	516	538
149	ENSMUSG00000028179	Cth	protein_coding	196.196	-1.27849	0.127371	-10.0376	1.04e-23	9.72e-22	139	141	102	107	252	257	276	272
150	ENSMUSG00000026728	Vim	protein_coding	10034.1	0.713271	0.0711248	10.0285	1.14e-23	1.06e-21	15046	14324	11211	12468	8596	6794	6663	6985
151	ENSMUSG00000024143	Rhoq	protein_coding	1515.99	-0.756403	0.0755321	-10.0143	1.32e-23	1.21e-21	1280	1346	1061	1102	2056	1826	1512	1893
152	ENSMUSG00000021108	Prkch	protein_coding	542.658	-1.18907	0.119049	-9.98807	1.72e-23	1.57e-21	326	412	355	303	683	682	742	761
153	ENSMUSG00000097023	Mir9-3hg	lincRNA	232.173	1.8729	0.1876	9.98347	1.8e-23	1.63e-21	588	387	305	303	68	105	120	84
154	ENSMUSG00000048540	Nhlh2	protein_coding	2242.18	0.586638	0.0589306	9.95472	2.41e-23	2.17e-21	3375	3215	2349	2573	1695	1653	1612	1879
155	ENSMUSG00000033960	Jcad	protein_coding	257.846	-1.6985	0.170719	-9.94908	2.55e-23	2.28e-21	126	115	123	145	435	375	255	449
156	ENSMUSG00000046818	Ddit4l	protein_coding	82.2996	-1.9367	0.19546	-9.90842	3.83e-23	3.41e-21	35	36	37	36	131	120	114	132
157	ENSMUSG00000040209	Zfp704	protein_coding	3104.53	-0.954098	0.0963762	-9.89973	4.17e-23	3.69e-21	2480	2539	2067	1910	3674	4236	3034	4745
158	ENSMUSG00000039194	Rlbp1	protein_coding	307.009	1.51796	0.153898	9.86341	6e-23	5.27e-21	495	549	407	476	117	152	189	143
159	ENSMUSG00000028909	Ptpru	protein_coding	3237.23	-0.556205	0.05656	-9.83389	8.04e-23	7.03e-21	3329	2839	2523	2469	3678	3849	3437	3730
160	ENSMUSG00000037664	Cdkn1c	protein_coding	2874.88	0.787949	0.0803291	9.80902	1.03e-22	8.94e-21	4591	4253	2967	3756	2355	1931	1698	2087
161	ENSMUSG00000028698	Pik3r3	protein_coding	4612.06	0.588103	0.0602037	9.76855	1.54e-22	1.33e-20	6740	6653	5078	5171	3588	3635	2948	3924
162	ENSMUSG00000058290	Espl1	protein_coding	1360.09	-0.596153	0.0612432	-9.73419	2.16e-22	1.85e-20	1416	1214	1019	980	1676	1561	1467	1542
163	ENSMUSG00000074364	Ehd2	protein_coding	480.915	-1.34856	0.138662	-9.72548	2.35e-22	2e-20	234	339	291	273	754	659	611	609
164	ENSMUSG00000027342	Pcna	protein_coding	2767.96	-0.632214	0.065162	-9.70218	2.95e-22	2.48e-20	2456	2643	2102	2023	3352	3112	3093	3269
165	ENSMUSG00000029673	Auts2	protein_coding	1262.98	0.705059	0.0726668	9.70263	2.94e-22	2.48e-20	1995	1870	1337	1502	852	956	842	1015
166	ENSMUSG00000049537	Tecrl	protein_coding	58.013	2.82368	0.291473	9.68761	3.4e-22	2.85e-20	166	103	91	81	21	9	13	12
167	ENSMUSG00000021685	Otp	protein_coding	60.2773	5.82804	0.602232	9.6774	3.76e-22	3.13e-20	255	86	75	108	5	2	1	0
168	ENSMUSG00000043067	Dpy19l1	protein_coding	1341.96	-0.715998	0.0740291	-9.67185	3.97e-22	3.28e-20	1125	1270	976	946	1649	1644	1398	1681
169	ENSMUSG00000061838	Suclg2	protein_coding	577.654	-0.898354	0.0929242	-9.66759	4.14e-22	3.4e-20	440	487	401	383	773	743	593	766
170	ENSMUSG00000026547	Tagln2	protein_coding	312.714	-1.7023	0.176123	-9.66541	4.23e-22	3.46e-20	114	162	159	175	416	435	495	468
171	ENSMUSG00000030428	Ttyh1	protein_coding	1431.89	1.11743	0.115679	9.65979	4.47e-22	3.63e-20	2323	2320	1832	1866	731	943	996	751
172	ENSMUSG00000055782	Abcd2	protein_coding	1201.04	0.677028	0.07029	9.63193	5.86e-22	4.73e-20	1786	1857	1255	1424	944	865	784	939
173	ENSMUSG00000021175	Cdca7l	protein_coding	570.057	-0.965201	0.100311	-9.62209	6.45e-22	5.18e-20	421	477	365	377	831	716	575	765
174	ENSMUSG00000019803	Nr2e1	protein_coding	1881.51	-0.745226	0.0777664	-9.58288	9.44e-22	7.53e-20	1498	1770	1323	1373	2416	2246	2002	2338
175	ENSMUSG00000051910	Sox6	protein_coding	215.803	1.2517	0.130713	9.5759	1.01e-21	8.01e-20	365	361	249	321	108	132	110	137
176	ENSMUSG00000022053	Ebf2	protein_coding	173.731	1.47786	0.154738	9.55068	1.29e-21	1.02e-19	345	266	203	278	77	88	96	88
177	ENSMUSG00000046402	Rbp1	protein_coding	1271.3	-0.918851	0.0962384	-9.54766	1.33e-21	1.04e-19	1122	1075	858	713	1696	1372	1673	1587
178	ENSMUSG00000046711	Hmga1	protein_coding	1966.61	-0.839691	0.0879723	-9.54494	1.36e-21	1.06e-19	1448	1758	1415	1340	2512	2278	2306	2524
179	ENSMUSG00000024518	Rax	protein_coding	1337.63	-0.847107	0.0888249	-9.53682	1.47e-21	1.14e-19	1135	1100	853	976	1805	1545	1708	1482
180	ENSMUSG00000027715	Ccna2	protein_coding	3360.7	-0.53097	0.0557203	-9.52921	1.58e-21	1.22e-19	3170	3319	2562	2642	3943	3749	3482	3986
181	ENSMUSG00000039621	Prex1	protein_coding	1802.32	-0.607189	0.0640637	-9.4779	2.59e-21	1.99e-19	1670	1608	1350	1433	2236	2029	1955	2078
182	ENSMUSG00000031990	Jam3	protein_coding	2160.49	-0.521411	0.0550655	-9.46892	2.83e-21	2.16e-19	2230	2068	1634	1645	2563	2349	2367	2428
183	ENSMUSG00000037712	Fermt2	protein_coding	1088.72	-0.684042	0.0722756	-9.46435	2.95e-21	2.24e-19	965	1053	781	763	1378	1334	1133	1281
184	ENSMUSG00000031558	Slit2	protein_coding	2273.84	0.914718	0.0967069	9.45866	3.12e-21	2.35e-19	3737	3277	2734	2910	1769	1674	1087	1518
185	ENSMUSG00000040183	Ankrd6	protein_coding	409.331	0.916822	0.0970206	9.44977	3.4e-21	2.55e-19	718	626	437	518	303	274	227	281
186	ENSMUSG00000032087	Dscaml1	protein_coding	386.041	0.917289	0.0971905	9.43805	3.8e-21	2.84e-19	587	569	458	527	253	257	245	263
187	ENSMUSG00000029546	Uncx	protein_coding	54.9568	3.6656	0.389005	9.42301	4.38e-21	3.26e-19	195	102	66	87	16	5	3	7
188	ENSMUSG00000020658	Efr3b	protein_coding	2861.94	0.459022	0.0487849	9.40909	5e-21	3.7e-19	4275	3817	2933	3149	2411	2357	2045	2395
189	ENSMUSG00000035455	Fignl1	protein_coding	958.399	-0.735804	0.0782131	-9.40768	5.07e-21	3.72e-19	826	898	687	653	1280	1167	984	1147
190	ENSMUSG00000035551	Igfbpl1	protein_coding	3681.91	0.691248	0.0734805	9.40723	5.09e-21	3.72e-19	5649	5206	3862	4678	2995	2513	2644	2582
191	ENSMUSG00000036502	Tmem255a	protein_coding	86.9331	-1.805	0.192335	-9.38466	6.31e-21	4.59e-19	42	51	27	45	135	131	117	133
192	ENSMUSG00000019230	Lhx9	protein_coding	181.526	1.18758	0.127309	9.32836	1.08e-20	7.78e-19	336	298	211	238	114	101	102	106
193	ENSMUSG00000056553	Ptprn2	protein_coding	709.621	0.767019	0.0823445	9.31476	1.22e-20	8.8e-19	1155	1060	735	881	501	553	447	505
194	ENSMUSG00000042942	Greb1l	protein_coding	495.087	1.20457	0.129361	9.31169	1.26e-20	9.01e-19	986	756	594	636	326	315	185	326
195	ENSMUSG00000098383	Gm27197	antisense	58.153	2.63925	0.283454	9.31104	1.27e-20	9.02e-19	139	137	75	85	24	12	8	18
196	ENSMUSG00000070498	Tmem132b	protein_coding	86.4209	-1.85342	0.199222	-9.30328	1.36e-20	9.65e-19	43	48	31	38	139	156	102	121
197	ENSMUSG00000046961	Gpr156	protein_coding	346.6	0.862891	0.0928749	9.29089	1.53e-20	1.08e-18	577	517	412	407	235	230	216	258
198	ENSMUSG00000033105	Lss	protein_coding	3044.99	0.518999	0.0558797	9.2878	1.58e-20	1.11e-18	4733	4044	3112	3465	2379	2493	2204	2475
199	ENSMUSG00000001911	Nfix	protein_coding	105.534	1.71932	0.185256	9.28082	1.68e-20	1.17e-18	215	167	145	163	37	59	48	43
200	ENSMUSG00000015484	Fam163a	protein_coding	665.933	0.881887	0.0952369	9.25993	2.05e-20	1.42e-18	1029	1018	740	889	406	430	467	479
201	ENSMUSG00000020733	Slc9a3r1	protein_coding	325.18	-1.04792	0.113335	-9.24622	2.33e-20	1.61e-18	227	254	205	212	462	389	420	397
202	ENSMUSG00000043004	Gng2	protein_coding	5749.73	0.440118	0.0476984	9.22709	2.78e-20	1.91e-18	8398	8043	5973	5944	4725	4710	4259	4933
203	ENSMUSG00000051243	Islr2	protein_coding	13565.7	0.520574	0.0566184	9.19443	3.77e-20	2.58e-18	19884	19027	14266	15135	10718	10077	10725	10912
204	ENSMUSG00000007872	Id3	protein_coding	1548.86	-0.661185	0.0720155	-9.18115	4.26e-20	2.9e-18	1348	1418	1110	1215	1993	1817	1661	1770
205	ENSMUSG00000021127	Zfp36l1	protein_coding	1225.83	-0.724021	0.0789971	-9.16516	4.95e-20	3.35e-18	1092	1098	860	886	1723	1346	1329	1435
206	ENSMUSG00000052852	Reep1	protein_coding	3641.53	0.470253	0.0513187	9.16339	5.03e-20	3.39e-18	5154	5142	3769	4002	2926	2903	2771	3043
207	ENSMUSG00000055254	Ntrk2	protein_coding	1515.74	1.03112	0.112662	9.15234	5.57e-20	3.74e-18	2245	2375	1970	2024	1140	1022	653	1011
208	ENSMUSG00000056758	Hmga2	protein_coding	390.662	-1.54856	0.169244	-9.14989	5.7e-20	3.81e-18	162	259	223	190	689	539	403	604
209	ENSMUSG00000022836	Mylk	protein_coding	771.619	-0.850822	0.0930934	-9.13945	6.28e-20	4.17e-18	694	605	509	538	957	999	738	1109
210	ENSMUSG00000054423	Cadps	protein_coding	3440.33	0.592306	0.064889	9.12799	6.98e-20	4.62e-18	5706	4780	3454	3857	2735	2718	2274	2762
211	ENSMUSG00000028693	Nasp	protein_coding	7710.94	-0.471763	0.0517859	-9.10986	8.25e-20	5.43e-18	7975	7486	5909	6184	8966	8482	7366	9450
212	ENSMUSG00000068923	Syt11	protein_coding	5514.42	0.4813	0.0528477	9.10729	8.45e-20	5.53e-18	7493	7689	6019	6132	4482	4495	4134	4441
213	ENSMUSG00000003410	Elavl3	protein_coding	7277.7	0.532109	0.0585008	9.09576	9.39e-20	6.13e-18	10347	10304	7512	8532	5867	5323	5428	6078
214	ENSMUSG00000027820	Mme	protein_coding	86.7534	1.96087	0.215741	9.089	1e-19	6.49e-18	148	161	127	148	43	38	18	37
215	ENSMUSG00000026622	Nek2	protein_coding	1096.84	-0.642668	0.0708198	-9.07468	1.14e-19	7.37e-18	988	997	835	817	1254	1321	1150	1377
216	ENSMUSG00000009376	Met	protein_coding	319.353	-1.02165	0.112647	-9.06948	1.2e-19	7.69e-18	263	281	170	192	468	424	339	408
217	ENSMUSG00000042606	Hirip3	protein_coding	1821.5	-0.553647	0.0610541	-9.06814	1.21e-19	7.75e-18	1898	1755	1341	1328	2100	2183	1773	2228
218	ENSMUSG00000028333	Anp32b	protein_coding	4740.62	-0.615018	0.0678631	-9.06264	1.27e-19	8.11e-18	4092	4639	3463	3700	5741	5408	4990	5759
219	ENSMUSG00000025576	Rbfox3	protein_coding	579.865	0.74613	0.0824686	9.04745	1.46e-19	9.28e-18	926	861	652	669	394	399	421	436
220	ENSMUSG00000037474	Dtl	protein_coding	1215.06	-0.670703	0.0743299	-9.02333	1.82e-19	1.15e-17	1155	1083	886	874	1608	1445	1151	1511
221	ENSMUSG00000017692	Rhbdl3	protein_coding	853.924	-0.79549	0.0883085	-9.00807	2.1e-19	1.32e-17	685	756	619	587	1064	945	1040	1076
222	ENSMUSG00000074476	Spc24	protein_coding	445.611	-0.748544	0.0833281	-8.9831	2.63e-19	1.65e-17	400	401	301	317	572	531	474	557
223	ENSMUSG00000017716	Birc5	protein_coding	1216.28	-0.628558	0.0700849	-8.96853	3.01e-19	1.87e-17	1186	1115	913	862	1496	1328	1412	1390
224	ENSMUSG00000056394	Lig1	protein_coding	2666.8	-0.549125	0.0613424	-8.95179	3.5e-19	2.17e-17	2473	2552	2035	2132	3121	2958	2901	3096
225	ENSMUSG00000006378	Gcat	protein_coding	279.73	-1.09987	0.122939	-8.94646	3.67e-19	2.26e-17	185	217	188	163	387	334	369	361
226	ENSMUSG00000006494	Pdk1	protein_coding	1655.34	0.654235	0.0731274	8.94651	3.67e-19	2.26e-17	2714	2290	1676	1999	1300	1259	1182	1163
227	ENSMUSG00000048001	Hes5	protein_coding	1746.29	-0.737647	0.0825541	-8.93531	4.06e-19	2.48e-17	1648	1459	1233	1239	2224	2000	2198	1878
228	ENSMUSG00000067206	Lrrc66	protein_coding	109.267	2.35759	0.264225	8.92268	4.55e-19	2.77e-17	274	223	180	117	61	25	27	24
229	ENSMUSG00000004113	Cacna1b	protein_coding	1964.38	0.631454	0.0707768	8.92178	4.59e-19	2.78e-17	3262	2601	2072	2297	1472	1529	1264	1627
230	ENSMUSG00000027314	Dll4	protein_coding	899.472	-0.76323	0.0855779	-8.91854	4.72e-19	2.85e-17	711	793	646	671	1106	1081	1053	1070
231	ENSMUSG00000026274	Pask	protein_coding	850.049	-0.625342	0.0702026	-8.90766	5.21e-19	3.13e-17	829	789	642	595	1066	1004	847	1026
232	ENSMUSG00000041757	Plekha6	protein_coding	1620.14	1.06847	0.119989	8.90474	5.35e-19	3.2e-17	3472	2187	1791	2038	1171	1042	750	1051
233	ENSMUSG00000034488	Edil3	protein_coding	1623.13	0.523341	0.0587846	8.90268	5.45e-19	3.25e-17	2449	2282	1671	1797	1345	1319	1096	1332
234	ENSMUSG00000041859	Mcm3	protein_coding	2739.74	-0.671221	0.0754113	-8.90081	5.54e-19	3.29e-17	2272	2475	2058	2128	3513	3206	2877	3257
235	ENSMUSG00000047143	Dmrta2	protein_coding	62.2685	2.12172	0.23906	8.87526	6.98e-19	4.11e-17	152	103	87	94	25	17	21	26
236	ENSMUSG00000048027	Rgmb	protein_coding	849.836	0.751347	0.0846537	8.87553	6.96e-19	4.11e-17	1452	1187	907	1028	703	596	501	625
237	ENSMUSG00000020340	Cyfip2	protein_coding	4581.49	0.541314	0.0610242	8.87047	7.28e-19	4.27e-17	6431	6491	4874	5336	3738	3590	3014	3932
238	ENSMUSG00000025395	Prim1	protein_coding	907.61	-0.614106	0.0693601	-8.85388	8.45e-19	4.93e-17	828	856	687	679	1084	1072	977	1053
239	ENSMUSG00000005410	Mcm5	protein_coding	2665.22	-0.692253	0.0783015	-8.84086	9.5e-19	5.52e-17	2254	2429	2036	1915	3517	2923	3025	3090
240	ENSMUSG00000025358	Cdk2	protein_coding	964.284	-0.582266	0.0659346	-8.83096	1.04e-18	6.01e-17	946	914	717	718	1193	1046	1045	1127
241	ENSMUSG00000039114	Nrn1	protein_coding	1085.87	0.740791	0.0839013	8.82932	1.05e-18	6.07e-17	1764	1687	1091	1297	733	757	775	833
242	ENSMUSG00000022673	Mcm4	protein_coding	2269.53	-0.617488	0.0699643	-8.82575	1.09e-18	6.24e-17	1976	2090	1704	1813	2832	2605	2356	2699
243	ENSMUSG00000037887	Dusp8	protein_coding	2020.26	0.696007	0.0790457	8.80513	1.31e-18	7.47e-17	3052	3106	2177	2352	1511	1280	1503	1580
244	ENSMUSG00000092035	Peg10	protein_coding	1301.68	0.785187	0.0895765	8.76555	1.86e-18	1.06e-16	1836	1902	1469	1769	1049	841	800	964
245	ENSMUSG00000099696	2900052N01Rik	lincRNA	66.775	-2.19426	0.25093	-8.74451	2.24e-18	1.27e-16	22	19	26	33	102	119	82	115
246	ENSMUSG00000061411	Nol4l	protein_coding	2470.28	0.475354	0.0544281	8.73361	2.47e-18	1.39e-16	3414	3365	2660	2788	2009	1930	1849	2096
247	ENSMUSG00000029168	Dpysl5	protein_coding	9552.3	0.444551	0.0509588	8.72374	2.69e-18	1.51e-16	13701	13114	9612	10637	8024	7385	7474	7967
248	ENSMUSG00000030500	Slc17a6	protein_coding	1102.14	0.606823	0.0697121	8.7047	3.18e-18	1.78e-16	1738	1609	1149	1215	802	866	762	906
249	ENSMUSG00000036913	Trim67	protein_coding	2334.11	0.539308	0.0619784	8.70155	3.27e-18	1.83e-16	3422	3216	2563	2594	1726	1772	1753	2002
250	ENSMUSG00000012443	Kif11	protein_coding	3041.81	-0.499906	0.0574633	-8.69957	3.33e-18	1.85e-16	3066	2948	2392	2334	3536	3547	2882	3661
251	ENSMUSG00000033737	Fndc3c1	protein_coding	722.017	-0.968521	0.111556	-8.68194	3.89e-18	2.15e-16	507	638	475	453	1035	928	695	1006
252	ENSMUSG00000086918	4930429F24Rik	lincRNA	57.7608	2.39564	0.276091	8.677	4.06e-18	2.24e-16	164	104	76	80	19	17	11	24
253	ENSMUSG00000060780	Lrrtm1	protein_coding	124.74	-1.50348	0.173368	-8.67222	4.24e-18	2.33e-16	78	82	53	65	195	134	181	193
254	ENSMUSG00000055874	Foxi3	protein_coding	41.6983	-3.78237	0.437602	-8.64341	5.46e-18	2.98e-16	1	13	5	5	113	73	43	71
255	ENSMUSG00000041986	Elmod1	protein_coding	608.141	0.736722	0.0852809	8.63877	5.68e-18	3.1e-16	985	907	632	735	450	484	389	419
256	ENSMUSG00000045179	Sox3	protein_coding	363.528	0.950374	0.110053	8.63561	5.84e-18	3.17e-16	525	592	434	483	278	216	220	232
257	ENSMUSG00000042807	Hecw2	protein_coding	387.999	0.799077	0.09257	8.63214	6.02e-18	3.25e-16	641	604	407	464	282	269	250	281
258	ENSMUSG00000025321	Itgb8	protein_coding	1743	0.729167	0.0845998	8.61901	6.75e-18	3.64e-16	2638	2592	2024	2021	1329	1314	944	1442
259	ENSMUSG00000033453	Adamts15	protein_coding	75.8346	-1.8698	0.217099	-8.61266	7.14e-18	3.83e-16	27	40	36	34	101	118	113	120
260	ENSMUSG00000020914	Top2a	protein_coding	12052.1	-0.558902	0.0649212	-8.60894	7.37e-18	3.94e-16	11398	11444	9380	9197	14297	14303	11270	15080
261	ENSMUSG00000026355	Mcm6	protein_coding	4038.38	-0.526383	0.061185	-8.60314	7.76e-18	4.13e-16	3812	3985	3152	3122	4813	4294	4383	4685
262	ENSMUSG00000043557	Mdga1	protein_coding	622.497	0.857433	0.0997654	8.59449	8.36e-18	4.43e-16	1086	906	662	789	503	437	329	428
263	ENSMUSG00000028517	Plpp3	protein_coding	464.797	-1.05005	0.122274	-8.58767	8.87e-18	4.69e-16	284	411	284	302	671	584	547	590
264	ENSMUSG00000055407	Map6	protein_coding	3488.82	0.423645	0.0493625	8.58232	9.3e-18	4.89e-16	5279	4596	3505	3748	2987	2874	2630	2884
265	ENSMUSG00000035168	Tanc1	protein_coding	845.007	-0.765175	0.0893621	-8.56263	1.1e-17	5.78e-16	708	767	573	615	1095	1032	805	1143
266	ENSMUSG00000029442	Wdr66	protein_coding	564.611	-0.676072	0.0789962	-8.55829	1.15e-17	5.98e-16	519	528	405	402	678	634	619	719
267	ENSMUSG00000042258	Isl1	protein_coding	4209.91	0.501889	0.0586823	8.55264	1.2e-17	6.26e-16	6524	5709	4202	4722	3396	3153	3204	3537
268	ENSMUSG00000053080	2700081O15Rik	protein_coding	4884.95	0.425588	0.0497856	8.54841	1.25e-17	6.47e-16	7401	6284	4945	5338	4025	3985	3737	4159
269	ENSMUSG00000070436	Serpinh1	protein_coding	3290.2	-0.691741	0.0810026	-8.53975	1.35e-17	6.95e-16	2797	2912	2436	2505	4592	3658	3346	3950
270	ENSMUSG00000020032	Nuak1	protein_coding	1497.97	0.61006	0.0714858	8.53399	1.41e-17	7.27e-16	2092	2182	1641	1786	1224	1130	947	1235
271	ENSMUSG00000029311	Hsd17b11	protein_coding	295.876	-1.1023	0.129282	-8.52633	1.51e-17	7.74e-16	185	255	178	180	421	424	320	378
272	ENSMUSG00000038644	Pold1	protein_coding	1238.41	-0.69506	0.0815397	-8.52419	1.54e-17	7.86e-16	1262	986	911	876	1672	1441	1366	1363
273	ENSMUSG00000027306	Nusap1	protein_coding	2393.44	-0.531789	0.0624354	-8.51744	1.63e-17	8.3e-16	2271	2417	1878	1771	2789	2651	2458	2905
274	ENSMUSG00000050666	Vstm4	protein_coding	68.6576	-1.73614	0.204255	-8.49988	1.9e-17	9.62e-16	34	41	28	32	107	102	91	103
275	ENSMUSG00000039994	Timeless	protein_coding	1094.59	-0.539934	0.0636375	-8.48453	2.17e-17	1.09e-15	1158	1021	807	830	1348	1283	1092	1233
276	ENSMUSG00000089760	D030046N08Rik	processed_transcript	197.809	-1.32023	0.155603	-8.48461	2.16e-17	1.09e-15	107	123	126	118	267	255	290	259
277	ENSMUSG00000037544	Dlgap5	protein_coding	1049.3	-0.591989	0.0698863	-8.47075	2.44e-17	1.22e-15	1010	1011	776	775	1309	1163	1033	1320
278	ENSMUSG00000035615	Frmpd1	protein_coding	235.466	-0.937163	0.110705	-8.46538	2.55e-17	1.28e-15	206	184	151	149	287	319	263	312
279	ENSMUSG00000060568	Fam78b	protein_coding	1169.27	0.596296	0.0705036	8.45766	2.73e-17	1.36e-15	1715	1792	1195	1326	906	876	843	927
280	ENSMUSG00000024427	Spry4	protein_coding	76.4964	-1.68537	0.199348	-8.45442	2.8e-17	1.39e-15	45	42	32	36	130	99	92	126
281	ENSMUSG00000004880	Lbr	protein_coding	1691.19	-0.561728	0.0664666	-8.45128	2.88e-17	1.42e-15	1629	1726	1256	1227	2015	1941	1662	2091
282	ENSMUSG00000031028	Tub	protein_coding	3961.95	0.453792	0.0537105	8.44885	2.94e-17	1.45e-15	5539	5327	4140	4502	3519	3149	2815	3295
283	ENSMUSG00000023328	Ache	protein_coding	456.525	1.13603	0.134539	8.44387	3.07e-17	1.51e-15	977	625	505	601	247	259	303	276
284	ENSMUSG00000025742	Prps2	protein_coding	484.383	-0.803253	0.0953818	-8.42145	3.72e-17	1.82e-15	384	413	335	363	648	595	498	612
285	ENSMUSG00000057329	Bcl2	protein_coding	438.088	-0.989624	0.117528	-8.42031	3.75e-17	1.83e-15	330	309	310	290	630	528	434	640
286	ENSMUSG00000029007	Agtrap	protein_coding	491.672	-0.767194	0.0913672	-8.39682	4.59e-17	2.23e-15	397	422	352	370	626	574	533	630
287	ENSMUSG00000044026	Slc35g1	protein_coding	206.56	-1.00445	0.119731	-8.38927	4.89e-17	2.37e-15	179	150	129	129	286	273	215	281
288	ENSMUSG00000063063	Ctnna2	protein_coding	2856.62	0.463925	0.0553112	8.38754	4.96e-17	2.39e-15	4121	4058	2980	3015	2281	2337	2061	2491
289	ENSMUSG00000034906	Ncaph	protein_coding	1478.84	-0.506845	0.0606066	-8.36286	6.12e-17	2.94e-15	1445	1432	1141	1181	1788	1672	1450	1722
290	ENSMUSG00000040270	Bach2	protein_coding	1418.61	0.518284	0.0620517	8.35246	6.69e-17	3.2e-15	2041	1974	1596	1514	1093	1156	1008	1195
291	ENSMUSG00000001517	Foxm1	protein_coding	2149.88	-0.516256	0.0620881	-8.31488	9.18e-17	4.38e-15	2207	1928	1702	1691	2663	2439	2072	2500
292	ENSMUSG00000071862	Lrrtm2	protein_coding	358.315	0.850762	0.102321	8.31464	9.2e-17	4.38e-15	575	534	430	429	241	274	191	272
293	ENSMUSG00000032436	Cmtm7	protein_coding	206.154	-1.04578	0.125916	-8.30538	9.95e-17	4.72e-15	155	167	122	129	265	249	280	262
294	ENSMUSG00000016918	Sulf1	protein_coding	109.566	-1.44277	0.173733	-8.30452	1e-16	4.74e-15	74	71	44	63	142	137	158	173
295	ENSMUSG00000036197	Gxylt1	protein_coding	1683.65	-0.63441	0.0764719	-8.296	1.08e-16	5.07e-15	1538	1552	1283	1235	2051	2115	1572	2100
296	ENSMUSG00000030677	Kif22	protein_coding	1499.13	-0.531291	0.0640749	-8.29171	1.12e-16	5.24e-15	1426	1443	1189	1153	1778	1691	1614	1671
297	ENSMUSG00000038255	Neurod2	protein_coding	32.3591	3.34847	0.404841	8.27107	1.33e-16	6.21e-15	77	61	47	66	1	9	6	6
298	ENSMUSG00000026442	Nfasc	protein_coding	3967.02	0.566168	0.0685191	8.26292	1.42e-16	6.63e-15	6147	5364	4128	4614	3272	3158	2453	3366
299	ENSMUSG00000043913	Ccdc60	protein_coding	449.985	-0.78807	0.0956002	-8.24339	1.67e-16	7.78e-15	375	364	353	305	579	548	495	551
300	ENSMUSG00000027217	Tspan18	protein_coding	1211.36	0.571844	0.06942	8.23746	1.76e-16	8.15e-15	1736	1681	1365	1382	1035	852	837	998
301	ENSMUSG00000044934	Zfp367	protein_coding	629.003	-0.729186	0.0885706	-8.23282	1.83e-16	8.44e-15	540	526	477	462	794	791	620	794
302	ENSMUSG00000000028	Cdc45	protein_coding	727.689	-0.749253	0.0910361	-8.23028	1.87e-16	8.59e-15	569	653	516	558	869	867	799	945
303	ENSMUSG00000028678	Kif2c	protein_coding	1192.65	-0.501482	0.0609881	-8.22262	1.99e-16	9.13e-15	1202	1182	919	911	1455	1318	1198	1368
304	ENSMUSG00000047904	Sstr2	protein_coding	1010.54	0.528882	0.0643852	8.21435	2.13e-16	9.75e-15	1485	1402	1105	1105	877	793	706	784
305	ENSMUSG00000053046	Brsk2	protein_coding	2197.14	0.560078	0.0682656	8.20439	2.32e-16	1.06e-14	3691	2864	2290	2405	1766	1764	1564	1684
306	ENSMUSG00000035873	Pawr	protein_coding	501.74	-1.0102	0.123343	-8.19017	2.61e-16	1.18e-14	349	399	266	395	703	590	559	711
307	ENSMUSG00000030726	Pold3	protein_coding	1433.33	-0.459749	0.0563116	-8.16438	3.23e-16	1.46e-14	1531	1424	1075	1132	1697	1604	1396	1646
308	ENSMUSG00000024056	Ndc80	protein_coding	891.958	-0.624346	0.0765338	-8.15778	3.41e-16	1.54e-14	781	865	687	649	1060	1035	962	1069
309	ENSMUSG00000021707	Dhfr	protein_coding	1003.35	-0.624853	0.0766262	-8.15457	3.5e-16	1.58e-14	906	1010	713	739	1211	1226	994	1222
310	ENSMUSG00000015305	Sash1	protein_coding	516.359	-0.762078	0.0935302	-8.14793	3.7e-16	1.66e-14	440	462	364	364	700	586	515	685
311	ENSMUSG00000032649	Colgalt2	protein_coding	385.518	0.859363	0.105604	8.13759	4.03e-16	1.8e-14	709	562	419	451	248	255	240	304
312	ENSMUSG00000041577	Prelp	protein_coding	90.281	1.67838	0.206248	8.13767	4.03e-16	1.8e-14	208	163	99	127	32	46	43	43
313	ENSMUSG00000025402	Nab2	protein_coding	98.962	-1.59332	0.195886	-8.13389	4.16e-16	1.84e-14	42	68	55	43	135	135	143	152
314	ENSMUSG00000076431	Sox4	protein_coding	5958.42	0.58647	0.0721643	8.12687	4.41e-16	1.95e-14	7782	8614	6712	7186	4467	4480	4369	4841
315	ENSMUSG00000048388	Fam171b	protein_coding	2003.55	0.481379	0.0593486	8.11104	5.02e-16	2.21e-14	2925	2740	2189	2119	1609	1653	1374	1756
316	ENSMUSG00000067438	Hmx1	protein_coding	1025.94	-0.744731	0.0919799	-8.09667	5.65e-16	2.48e-14	791	915	762	769	1341	1158	1164	1236
317	ENSMUSG00000042249	Grk3	protein_coding	279.783	0.884592	0.109321	8.09171	5.88e-16	2.58e-14	489	413	317	338	197	214	155	186
318	ENSMUSG00000015134	Aldh1a3	protein_coding	1018.25	-4.984	0.617751	-8.06798	7.15e-16	3.12e-14	12	68	105	63	2189	1895	1655	1806
319	ENSMUSG00000037625	Cldn11	protein_coding	107.275	1.64714	0.204185	8.06693	7.21e-16	3.14e-14	180	209	176	127	71	42	37	49
320	ENSMUSG00000017376	Nlk	protein_coding	3750.13	0.42617	0.0528796	8.05925	7.68e-16	3.32e-14	5375	5254	3746	4034	3086	3156	2725	3256
321	ENSMUSG00000074637	Sox2	protein_coding	1996.45	-0.564761	0.070076	-8.05926	7.68e-16	3.32e-14	1804	1962	1528	1546	2327	2142	2169	2446
322	ENSMUSG00000027331	Knstrn	protein_coding	1505.4	-0.473501	0.0587779	-8.05577	7.9e-16	3.41e-14	1545	1445	1237	1142	1711	1705	1539	1722
323	ENSMUSG00000022790	Igsf11	protein_coding	467.008	-0.739139	0.0918147	-8.05034	8.26e-16	3.55e-14	419	442	324	310	529	588	544	564
324	ENSMUSG00000026669	Mcm10	protein_coding	675.047	-0.645473	0.0802629	-8.04198	8.84e-16	3.79e-14	666	564	486	526	865	824	674	784
325	ENSMUSG00000042207	Kdm5b	protein_coding	3954.68	0.420258	0.0523202	8.03243	9.56e-16	4.07e-14	5681	5347	3977	4345	3255	3392	2833	3443
326	ENSMUSG00000050272	Dscam	protein_coding	992.305	0.568568	0.0707817	8.0327	9.54e-16	4.07e-14	1488	1439	1083	1064	805	793	633	827
327	ENSMUSG00000078429	Ctdsp2	protein_coding	5537.65	-0.556027	0.06923	-8.03158	9.62e-16	4.09e-14	4889	5329	4468	4288	6594	6459	5791	6306
328	ENSMUSG00000027469	Tpx2	protein_coding	3570.88	-0.511184	0.0636535	-8.03072	9.69e-16	4.1e-14	3287	3557	2838	2814	4200	3973	3599	4255
329	ENSMUSG00000017499	Cdc6	protein_coding	585.346	-0.684534	0.0853399	-8.02127	1.05e-15	4.42e-14	505	536	429	437	766	654	612	724
330	ENSMUSG00000004698	Hdac9	protein_coding	629.552	0.696492	0.0869752	8.00793	1.17e-15	4.9e-14	923	936	696	764	489	460	368	522
331	ENSMUSG00000070509	Rgma	protein_coding	440.027	0.811094	0.101282	8.00823	1.16e-15	4.9e-14	676	650	534	526	351	253	303	311
332	ENSMUSG00000017493	Igfbp4	protein_coding	2228.92	-0.583721	0.0729311	-8.00373	1.21e-15	5.05e-14	2020	2059	1757	1723	2703	2344	2507	2634
333	ENSMUSG00000063919	Srrm4	protein_coding	3019.23	0.552812	0.069127	7.99705	1.27e-15	5.32e-14	4929	3928	3173	3366	2354	2486	1968	2553
334	ENSMUSG00000006715	Gmnn	protein_coding	728.937	-0.668449	0.0837159	-7.98473	1.41e-15	5.86e-14	615	680	546	546	850	840	828	890
335	ENSMUSG00000020897	Aurkb	protein_coding	1368.34	-0.54139	0.0678882	-7.97472	1.53e-15	6.33e-14	1293	1332	1037	1078	1594	1541	1527	1515
336	ENSMUSG00000026347	Tmem163	protein_coding	285.936	0.83736	0.105186	7.96077	1.71e-15	7.07e-14	463	448	313	346	200	193	200	189
337	ENSMUSG00000004031	Brinp2	protein_coding	1091.05	0.586584	0.073703	7.95875	1.74e-15	7.16e-14	1714	1522	1068	1309	874	797	786	872
338	ENSMUSG00000029291	Rufy3	protein_coding	6527.89	0.382099	0.0480556	7.95119	1.85e-15	7.59e-14	9338	8835	6522	6918	5370	5378	5111	5761
339	ENSMUSG00000032181	Scg3	protein_coding	2928.25	0.500728	0.0629816	7.95039	1.86e-15	7.6e-14	4307	4223	2979	3190	2246	2248	2285	2461
340	ENSMUSG00000055612	Cdca7	protein_coding	1568.3	-0.576426	0.0724996	-7.95075	1.85e-15	7.6e-14	1388	1481	1202	1262	1934	1740	1665	1823
341	ENSMUSG00000003779	Kif20a	protein_coding	1296.34	-0.509143	0.0640887	-7.94434	1.95e-15	7.95e-14	1291	1278	1011	983	1598	1426	1262	1535
342	ENSMUSG00000029591	Ung	protein_coding	511.533	-0.7391	0.0933509	-7.91743	2.42e-15	9.85e-14	420	486	359	365	687	602	554	599
343	ENSMUSG00000021010	Npas3	protein_coding	219.84	1.07619	0.135994	7.91348	2.5e-15	1.01e-13	332	364	271	300	159	110	114	158
344	ENSMUSG00000025001	Hells	protein_coding	1480.26	-0.594929	0.0753645	-7.89402	2.93e-15	1.18e-13	1403	1394	1110	1115	1849	1832	1358	1780
345	ENSMUSG00000029843	Slc13a4	protein_coding	41.8538	-4.19672	0.532548	-7.88047	3.26e-15	1.31e-13	3	3	6	6	91	116	17	84
346	ENSMUSG00000019917	2021-09-10	protein_coding	319.945	-0.806313	0.102358	-7.87737	3.34e-15	1.34e-13	259	282	229	219	392	401	339	422
347	ENSMUSG00000059187	Fam19a1	protein_coding	33.5866	-2.80039	0.355728	-7.87228	3.48e-15	1.39e-13	6	16	7	7	46	65	51	62
348	ENSMUSG00000033565	Rbfox2	protein_coding	6753.16	0.402073	0.051129	7.8639	3.72e-15	1.49e-13	9433	9265	6939	7203	5577	5494	5004	6145
349	ENSMUSG00000002870	Mcm2	protein_coding	3120.15	-0.571549	0.0728932	-7.84092	4.47e-15	1.78e-13	2767	3004	2421	2445	4003	3414	3298	3522
350	ENSMUSG00000032397	Tipin	protein_coding	1264.9	-0.578207	0.0737433	-7.84081	4.48e-15	1.78e-13	1198	1256	933	941	1439	1523	1428	1378
351	ENSMUSG00000015880	Ncapg	protein_coding	1343.74	-0.577271	0.0736755	-7.83532	4.68e-15	1.85e-13	1304	1326	992	985	1581	1619	1256	1702
352	ENSMUSG00000056209	Npm3	protein_coding	374.741	-0.990304	0.126442	-7.83208	4.8e-15	1.89e-13	272	314	246	233	527	403	520	444
353	ENSMUSG00000019961	Tmpo	protein_coding	8066.38	-0.381976	0.048793	-7.8285	4.94e-15	1.94e-13	8419	8349	6423	6667	9369	8653	7630	9237
354	ENSMUSG00000027454	Gins1	protein_coding	426.622	-0.677841	0.0867209	-7.81635	5.44e-15	2.13e-13	410	383	297	311	503	475	492	531
355	ENSMUSG00000025089	Gfra1	protein_coding	816.932	0.698537	0.0894143	7.81237	5.61e-15	2.2e-13	1314	1135	886	988	666	620	450	652
356	ENSMUSG00000026176	Ctdsp1	protein_coding	910.565	-0.754353	0.0966495	-7.80504	5.95e-15	2.32e-13	728	867	645	639	1297	1060	981	1029
357	ENSMUSG00000057716	Tmem178b	protein_coding	1148.51	0.602665	0.0772157	7.80495	5.95e-15	2.32e-13	1647	1661	1302	1291	837	945	731	973
358	ENSMUSG00000036019	Tmtc2	protein_coding	1938.36	-0.577995	0.0740726	-7.80309	6.04e-15	2.34e-13	1898	1928	1322	1505	2373	2322	1794	2400
359	ENSMUSG00000079057	Cyp4v3	protein_coding	115.637	1.20442	0.154414	7.79995	6.19e-15	2.4e-13	202	173	155	156	70	64	60	73
360	ENSMUSG00000027323	Rad51	protein_coding	858.773	-0.575585	0.0738029	-7.79894	6.24e-15	2.41e-13	789	813	672	655	1060	961	921	977
361	ENSMUSG00000026587	Astn1	protein_coding	3087.99	0.469446	0.0602993	7.78526	6.96e-15	2.68e-13	4426	4331	3117	3455	2416	2618	2182	2676
362	ENSMUSG00000025403	Shmt2	protein_coding	2048.94	-0.481813	0.0619078	-7.78276	7.1e-15	2.72e-13	2136	1985	1551	1626	2365	2167	2295	2266
363	ENSMUSG00000032531	Amotl2	protein_coding	3193.74	0.445999	0.0573183	7.78109	7.19e-15	2.75e-13	4556	4267	3201	3691	2771	2610	2235	2720
364	ENSMUSG00000057098	Ebf1	protein_coding	2399.83	0.535753	0.0688748	7.77865	7.33e-15	2.8e-13	3396	3420	2703	2588	1807	1897	1636	2146
365	ENSMUSG00000032589	Bsn	protein_coding	2533.6	0.556246	0.0715676	7.77232	7.71e-15	2.93e-13	3894	3377	2734	2879	1984	2128	1573	2166
366	ENSMUSG00000040280	Ndufa4l2	protein_coding	606.799	-1.22556	0.157832	-7.76499	8.17e-15	3.1e-13	343	438	393	352	701	807	1002	700
367	ENSMUSG00000024501	Dpysl3	protein_coding	27660.8	0.4157	0.0537006	7.74106	9.86e-15	3.72e-13	38901	37282	28109	30645	22276	21743	21527	24850
368	ENSMUSG00000029247	Paics	protein_coding	4802.64	-0.465325	0.0601103	-7.74118	9.85e-15	3.72e-13	4539	4946	3812	3847	5577	5281	4871	5533
369	ENSMUSG00000026933	Camsap1	protein_coding	2969.08	0.393286	0.0508315	7.73705	1.02e-14	3.83e-13	4338	3833	3064	3173	2561	2547	2124	2578
370	ENSMUSG00000038065	Mturn	protein_coding	3087.92	0.406049	0.0525602	7.72539	1.12e-14	4.19e-13	4291	4285	3100	3361	2561	2607	2300	2672
371	ENSMUSG00000052928	Ctif	protein_coding	1608.59	0.443555	0.0574271	7.72379	1.13e-14	4.23e-13	2275	2139	1692	1795	1370	1233	1232	1365
372	ENSMUSG00000032261	Sh3bgrl2	protein_coding	1528.18	-0.825015	0.106847	-7.72148	1.15e-14	4.29e-13	1071	1480	1095	1021	1999	2001	1564	1906
373	ENSMUSG00000032812	Arap1	protein_coding	191.272	-1.02111	0.132275	-7.71955	1.17e-14	4.35e-13	147	137	144	107	255	243	231	247
374	ENSMUSG00000003038	Hmgn2	protein_coding	6590.79	-0.4715	0.0611058	-7.71612	1.2e-14	4.44e-13	6337	6754	5324	5077	7386	7114	7058	7632
375	ENSMUSG00000027111	Itga6	protein_coding	1546.9	-0.599079	0.0776384	-7.71627	1.2e-14	4.44e-13	1332	1479	1211	1188	1849	1881	1542	1846
376	ENSMUSG00000018476	Kdm6b	protein_coding	2371.76	0.409706	0.0531006	7.71566	1.2e-14	4.45e-13	3551	3028	2410	2585	2072	1976	1770	1960
377	ENSMUSG00000027692	Tnik	protein_coding	2186.61	0.551321	0.0714729	7.71371	1.22e-14	4.5e-13	3330	3050	2284	2460	1534	1796	1549	1889
378	ENSMUSG00000005667	Mthfd2	protein_coding	421.313	-0.654434	0.0848801	-7.7101	1.26e-14	4.62e-13	410	380	292	316	502	488	440	538
379	ENSMUSG00000062432	Cyp26c1	protein_coding	54.1231	-2.06537	0.268651	-7.68792	1.5e-14	5.48e-13	30	19	24	16	74	108	82	68
380	ENSMUSG00000019214	Chtf18	protein_coding	360.776	-0.774518	0.10082	-7.68216	1.56e-14	5.72e-13	352	302	255	230	495	435	406	402
381	ENSMUSG00000006369	Fbln1	protein_coding	529.104	-0.980127	0.127664	-7.67738	1.62e-14	5.92e-13	379	391	321	410	827	612	530	722
382	ENSMUSG00000044647	Csrnp3	protein_coding	2061.02	0.691204	0.0900574	7.67514	1.65e-14	6.01e-13	3349	3029	2224	2324	1588	1631	1109	1720
383	ENSMUSG00000040204	Pclaf	protein_coding	1715.02	-0.794422	0.103521	-7.67404	1.67e-14	6.01e-13	1750	1427	1161	1056	2579	2202	1720	1827
384	ENSMUSG00000044461	Shisa2	protein_coding	818.204	-0.936653	0.122053	-7.67417	1.66e-14	6.01e-13	585	703	588	501	1316	1013	820	969
385	ENSMUSG00000050334	C130071C03Rik	lincRNA	3074.45	0.570987	0.0744045	7.6741	1.67e-14	6.01e-13	5121	4157	3121	3405	2207	2552	2260	2408
386	ENSMUSG00000025359	Pmel	protein_coding	94.7807	-1.74994	0.22809	-7.67214	1.69e-14	6.07e-13	47	51	51	35	201	110	130	117
387	ENSMUSG00000026683	Nuf2	protein_coding	1185.7	-0.479316	0.062473	-7.67237	1.69e-14	6.07e-13	1175	1150	961	927	1365	1294	1225	1383
388	ENSMUSG00000041073	Nacad	protein_coding	1899.3	0.484061	0.0631761	7.6621	1.83e-14	6.55e-13	2912	2542	1941	2090	1497	1510	1515	1509
389	ENSMUSG00000025056	Nr0b1	protein_coding	74.7226	-1.77696	0.232109	-7.65572	1.92e-14	6.86e-13	25	54	32	32	128	104	104	105
390	ENSMUSG00000032194	Kank2	protein_coding	294.242	-0.942413	0.123162	-7.65179	1.98e-14	7.06e-13	210	233	200	208	420	384	289	388
391	ENSMUSG00000027115	Kif18a	protein_coding	830.554	-0.618011	0.0808205	-7.64671	2.06e-14	7.33e-13	776	821	616	585	990	918	839	1098
392	ENSMUSG00000020186	Csrp2	protein_coding	2374.55	-0.440165	0.0575805	-7.64434	2.1e-14	7.44e-13	2379	2413	1826	1964	2824	2591	2428	2588
393	ENSMUSG00000097156	Gm3764	lincRNA	51.9971	3.1194	0.408942	7.62796	2.38e-14	8.43e-13	220	76	48	75	9	15	10	7
394	ENSMUSG00000055116	Arntl	protein_coding	1443.08	-0.559207	0.0733317	-7.62571	2.43e-14	8.56e-13	1335	1491	1054	1096	1606	1618	1541	1793
395	ENSMUSG00000059325	Hopx	protein_coding	66.1781	-2.05081	0.269069	-7.62185	2.5e-14	8.79e-13	18	35	22	33	74	107	108	115
396	ENSMUSG00000030605	Mfge8	protein_coding	466.983	-0.781253	0.102569	-7.61682	2.6e-14	9.12e-13	396	369	318	371	628	542	552	526
397	ENSMUSG00000039748	Exo1	protein_coding	868.895	-0.649236	0.0852886	-7.61223	2.69e-14	9.43e-13	774	822	659	623	1137	960	845	1119
398	ENSMUSG00000003233	Dvl3	protein_coding	1581.29	0.411696	0.054175	7.59937	2.98e-14	1.04e-12	2261	2057	1679	1704	1362	1310	1144	1368
399	ENSMUSG00000029005	Draxin	protein_coding	2425.64	0.443288	0.0583725	7.59412	3.1e-14	1.08e-12	3497	3267	2399	2779	2085	1975	1709	2089
400	ENSMUSG00000020963	Tshr	protein_coding	157.693	-1.04235	0.137307	-7.59137	3.17e-14	1.1e-12	115	138	93	94	220	205	189	196
401	ENSMUSG00000028702	Rad54l	protein_coding	698.211	-0.60602	0.0799429	-7.58066	3.44e-14	1.19e-12	705	604	539	512	914	806	687	815
402	ENSMUSG00000023015	Racgap1	protein_coding	4030.65	-0.462413	0.0610607	-7.57301	3.65e-14	1.26e-12	3816	4089	3224	3264	4677	4336	4139	4672
403	ENSMUSG00000049001	Ndnf	protein_coding	250.408	0.839393	0.110844	7.57276	3.65e-14	1.26e-12	409	387	300	280	176	182	140	189
404	ENSMUSG00000072568	Fam84b	protein_coding	326.525	0.877382	0.115875	7.57182	3.68e-14	1.27e-12	615	502	382	329	235	212	204	229
405	ENSMUSG00000030125	Lrrc23	protein_coding	89.6403	-1.53686	0.203155	-7.56495	3.88e-14	1.33e-12	61	42	51	41	117	150	131	108
406	ENSMUSG00000024909	Efemp2	protein_coding	309.421	-0.797809	0.105558	-7.55803	4.09e-14	1.4e-12	269	266	211	216	405	355	383	352
407	ENSMUSG00000093930	Hmgcs1	protein_coding	20798.2	0.393076	0.0520073	7.55808	4.09e-14	1.4e-12	27706	28608	21520	22734	16989	17749	15886	17975
408	ENSMUSG00000017765	Slc12a4	protein_coding	84.5276	-1.43701	0.190199	-7.55529	4.18e-14	1.42e-12	47	47	51	47	126	114	116	113
409	ENSMUSG00000046179	E2f8	protein_coding	875.828	-0.478177	0.0633175	-7.55205	4.28e-14	1.46e-12	904	842	683	692	994	994	887	1016
410	ENSMUSG00000026991	Pkp4	protein_coding	1908.89	-0.599964	0.0794525	-7.55123	4.31e-14	1.46e-12	1654	1838	1543	1395	2379	2208	1877	2330
411	ENSMUSG00000050840	Cdh20	protein_coding	1107.15	-0.759406	0.100641	-7.54572	4.5e-14	1.52e-12	835	1109	776	771	1262	1424	1233	1388
412	ENSMUSG00000031285	Dcx	protein_coding	10341.9	0.588669	0.0780392	7.54325	4.58e-14	1.55e-12	16762	14994	10459	11261	8251	8250	6214	8937
413	ENSMUSG00000019647	Sema6a	protein_coding	1998.42	0.475688	0.0631599	7.5315	5.02e-14	1.69e-12	3021	2620	1969	2331	1665	1614	1515	1582
414	ENSMUSG00000015599	Ttbk1	protein_coding	884.767	0.551385	0.0733101	7.52127	5.42e-14	1.82e-12	1380	1268	912	955	762	642	643	694
415	ENSMUSG00000030411	Nova2	protein_coding	1624.76	0.633383	0.0842354	7.51921	5.51e-14	1.84e-12	2777	2091	1597	2013	1267	1249	1064	1288
416	ENSMUSG00000027242	Wdr76	protein_coding	760.601	-0.538966	0.0717914	-7.50738	6.03e-14	2.01e-12	786	721	538	606	883	895	743	923
417	ENSMUSG00000020122	Egfr	protein_coding	146.014	-1.15108	0.153392	-7.50417	6.18e-14	2.05e-12	97	108	106	73	195	196	170	207
418	ENSMUSG00000037991	Rmi2	protein_coding	224.711	-0.912683	0.121621	-7.5043	6.18e-14	2.05e-12	185	199	149	133	277	255	275	312
419	ENSMUSG00000027018	Hat1	protein_coding	1427.32	-0.559409	0.074631	-7.49567	6.6e-14	2.19e-12	1275	1435	1120	1072	1724	1547	1509	1709
420	ENSMUSG00000024033	Rsph1	protein_coding	131.59	-1.41402	0.188867	-7.48685	7.05e-14	2.33e-12	59	83	77	81	168	194	193	170
421	ENSMUSG00000019818	Cd164	protein_coding	1586.77	-0.58897	0.0787217	-7.48167	7.34e-14	2.42e-12	1476	1526	1190	1202	2044	1909	1442	1906
422	ENSMUSG00000051220	Ercc6l	protein_coding	635.426	-0.681265	0.0911191	-7.47664	7.62e-14	2.51e-12	547	580	467	478	864	757	617	756
423	ENSMUSG00000021048	Mthfd1	protein_coding	843.497	-0.546335	0.0732099	-7.46258	8.48e-14	2.79e-12	790	781	664	674	996	926	874	1024
424	ENSMUSG00000028583	Pdpn	protein_coding	599.467	0.604902	0.0810785	7.4607	8.61e-14	2.82e-12	868	862	633	720	476	441	449	446
425	ENSMUSG00000032291	Crabp1	protein_coding	1700.56	0.775407	0.10406	7.45153	9.23e-14	3.02e-12	2484	2517	1941	2176	1323	955	1304	1187
426	ENSMUSG00000034310	Tmem132d	protein_coding	343.056	0.710065	0.0953688	7.44546	9.66e-14	3.15e-12	510	522	385	401	265	247	212	271
427	ENSMUSG00000053799	Exoc6	protein_coding	278.031	-0.865743	0.116298	-7.44415	9.76e-14	3.17e-12	205	258	188	186	341	344	308	377
428	ENSMUSG00000002835	Chaf1a	protein_coding	1132.92	-0.641196	0.0862414	-7.4349	1.05e-13	3.4e-12	1006	988	843	911	1524	1266	1095	1398
429	ENSMUSG00000020140	Lgr5	protein_coding	228.935	1.04961	0.141334	7.42643	1.12e-13	3.61e-12	420	313	268	318	178	149	102	143
430	ENSMUSG00000031342	Gpm6b	protein_coding	4046.31	0.575812	0.0775415	7.42586	1.12e-13	3.62e-12	6130	6080	4255	4318	2809	3023	3132	3405
431	ENSMUSG00000024206	Rfx2	protein_coding	280.514	-0.855083	0.115242	-7.4199	1.17e-13	3.78e-12	214	234	206	191	350	317	340	368
432	ENSMUSG00000032280	Tle3	protein_coding	2271.99	-0.420718	0.0567079	-7.41904	1.18e-13	3.79e-12	2311	2267	1833	1856	2688	2389	2330	2515
433	ENSMUSG00000020607	Fam84a	protein_coding	319.413	0.84512	0.114036	7.41097	1.25e-13	4.02e-12	539	455	382	378	270	207	205	190
434	ENSMUSG00000029919	Hpgds	protein_coding	77.3496	1.70633	0.230282	7.40974	1.27e-13	4.05e-12	187	107	92	124	39	42	26	32
435	ENSMUSG00000028977	Casz1	protein_coding	1379.46	-0.575537	0.0777065	-7.40655	1.3e-13	4.14e-12	1252	1298	1118	1030	1652	1714	1342	1600
436	ENSMUSG00000002297	Dbf4	protein_coding	1400.58	-0.416241	0.0562557	-7.3991	1.37e-13	4.36e-12	1491	1408	1127	1096	1546	1529	1414	1621
437	ENSMUSG00000022360	Atad2	protein_coding	1833.36	-0.586063	0.0792044	-7.39937	1.37e-13	4.36e-12	1821	1707	1393	1335	2304	2272	1624	2233
438	ENSMUSG00000076441	Ass1	protein_coding	147.337	-1.20298	0.162721	-7.3929	1.44e-13	4.56e-12	85	114	88	90	191	226	189	175
439	ENSMUSG00000039782	Cpeb2	protein_coding	562.288	0.591069	0.080076	7.38135	1.57e-13	4.96e-12	887	764	617	624	430	432	372	481
440	ENSMUSG00000105265	Sox2ot	processed_transcript	411.888	0.806779	0.109311	7.38059	1.58e-13	4.98e-12	629	608	533	459	245	285	291	319
441	ENSMUSG00000022483	Col2a1	protein_coding	1224.95	-0.709489	0.0961827	-7.37647	1.63e-13	5.12e-12	1310	937	848	884	1706	1533	1177	1405
442	ENSMUSG00000042724	Map3k9	protein_coding	1400.44	0.556439	0.0754993	7.37012	1.7e-13	5.36e-12	2082	1935	1464	1638	1120	1090	878	1252
443	ENSMUSG00000025092	Hspa12a	protein_coding	3489.67	0.436429	0.0592382	7.36736	1.74e-13	5.46e-12	5009	4832	3465	3863	3002	2858	2397	3088
444	ENSMUSG00000037313	Tacc3	protein_coding	1535.77	-0.423729	0.0575774	-7.35929	1.85e-13	5.78e-12	1620	1482	1246	1239	1684	1749	1572	1704
445	ENSMUSG00000028576	Ift74	protein_coding	1126.22	-0.544557	0.074041	-7.35481	1.91e-13	5.97e-12	1017	1143	869	865	1285	1286	1205	1318
446	ENSMUSG00000058975	Kcnc1	protein_coding	409.868	0.672025	0.091383	7.35394	1.92e-13	5.99e-12	664	554	463	471	314	276	300	315
447	ENSMUSG00000028560	Usp1	protein_coding	2206	-0.533683	0.0726074	-7.35027	1.98e-13	6.15e-12	2002	2215	1790	1646	2564	2536	2182	2687
448	ENSMUSG00000037894	H2afz	protein_coding	4279.98	-0.503505	0.0685458	-7.34552	2.05e-13	6.36e-12	4024	4337	3409	3281	4942	4671	4797	4700
449	ENSMUSG00000034485	Uaca	protein_coding	1134.71	-0.57596	0.0784719	-7.3397	2.14e-13	6.62e-12	993	1045	896	918	1322	1337	1166	1357
450	ENSMUSG00000047171	Helt	protein_coding	33.0225	7.68837	1.04833	7.33391	2.24e-13	6.88e-12	73	74	61	70	1	0	0	0
451	ENSMUSG00000048349	Pou4f1	protein_coding	3121.74	0.617429	0.0841855	7.33415	2.23e-13	6.88e-12	4699	4716	3268	3510	2069	2342	2470	2484
452	ENSMUSG00000022881	Rfc4	protein_coding	719.171	-0.635783	0.0868205	-7.32296	2.43e-13	7.45e-12	641	665	540	545	908	750	833	842
453	ENSMUSG00000020917	Acly	protein_coding	10990.1	0.351908	0.0481261	7.3122	2.63e-13	8.06e-12	14980	14793	10802	12027	9625	8997	8543	9689
454	ENSMUSG00000046186	Cd109	protein_coding	119.174	-1.11443	0.152497	-7.30791	2.71e-13	8.3e-12	92	93	72	65	166	165	127	166
455	ENSMUSG00000078302	Foxd1	protein_coding	172.371	-1.24431	0.17055	-7.29583	2.97e-13	9.06e-12	90	111	124	102	235	217	239	229
456	ENSMUSG00000019124	Scrn1	protein_coding	6797.42	0.402798	0.0552465	7.29091	3.08e-13	9.36e-12	8926	9240	7336	7391	5972	5702	5106	5565
457	ENSMUSG00000031517	Gpm6a	protein_coding	5849.89	0.408693	0.0560552	7.2909	3.08e-13	9.36e-12	8237	8441	5851	6067	4923	4926	4268	5085
458	ENSMUSG00000020668	Kif3c	protein_coding	2916.46	0.413538	0.0567351	7.28892	3.12e-13	9.48e-12	3919	4051	3069	3156	2448	2415	2109	2583
459	ENSMUSG00000040447	Spns2	protein_coding	724.544	0.644751	0.088488	7.28631	3.19e-13	9.64e-12	1241	1008	740	815	619	512	507	521
460	ENSMUSG00000034311	Kif4	protein_coding	1337.87	-0.490383	0.0673904	-7.27675	3.42e-13	1.03e-11	1298	1359	1039	1044	1538	1581	1281	1573
461	ENSMUSG00000067889	Sptbn2	protein_coding	5009.25	0.342934	0.0471613	7.27152	3.55e-13	1.07e-11	6995	6425	5044	5433	4224	4178	3934	4514
462	ENSMUSG00000042903	Foxo4	protein_coding	638.453	-0.616868	0.0849258	-7.26362	3.77e-13	1.13e-11	573	600	496	472	740	734	644	834
463	ENSMUSG00000018983	E2f2	protein_coding	560.532	-0.647193	0.0891913	-7.25623	3.98e-13	1.19e-11	472	519	424	435	688	663	613	643
464	ENSMUSG00000024660	Incenp	protein_coding	2056.44	-0.417044	0.0575852	-7.24221	4.41e-13	1.32e-11	2103	2034	1692	1663	2434	2173	2015	2359
465	ENSMUSG00000031688	Pou4f2	protein_coding	2503.04	0.455738	0.0629639	7.23808	4.55e-13	1.36e-11	3694	3242	2527	2895	2265	1924	1828	2046
466	ENSMUSG00000018411	Mapt	protein_coding	9530.58	0.409417	0.0566458	7.22766	4.91e-13	1.46e-11	13996	12993	9371	10241	7672	8142	7616	7756
467	ENSMUSG00000002274	Metrn	protein_coding	406.694	-0.819431	0.113481	-7.22089	5.16e-13	1.54e-11	312	384	285	269	517	431	501	528
468	ENSMUSG00000034349	Smc4	protein_coding	3999.21	-0.546453	0.0756883	-7.21977	5.21e-13	1.55e-11	3738	3930	3266	2884	4596	4753	3769	5044
469	ENSMUSG00000062296	Trank1	protein_coding	217.292	1.34403	0.1863	7.21434	5.42e-13	1.61e-11	547	302	224	287	128	127	120	93
470	ENSMUSG00000041378	Cldn5	protein_coding	112.226	-1.54836	0.214672	-7.21269	5.49e-13	1.62e-11	57	46	56	79	152	152	177	152
471	ENSMUSG00000002980	Bcam	protein_coding	236.827	-0.994002	0.137864	-7.21004	5.59e-13	1.65e-11	148	196	157	166	333	274	288	306
472	ENSMUSG00000074749	Kiz	protein_coding	514.351	-0.581451	0.0806504	-7.20953	5.61e-13	1.65e-11	493	473	407	380	612	606	545	588
473	ENSMUSG00000027950	Chrnb2	protein_coding	1652.17	0.421029	0.0584126	7.20785	5.68e-13	1.67e-11	2339	2274	1672	1798	1368	1298	1293	1429
474	ENSMUSG00000022034	Esco2	protein_coding	700.317	-0.546231	0.0758121	-7.20507	5.8e-13	1.7e-11	681	676	534	535	809	756	720	889
475	ENSMUSG00000031906	Smpd3	protein_coding	2071.52	0.433898	0.0602981	7.19589	6.21e-13	1.81e-11	2745	2886	2214	2282	1747	1651	1586	1737
476	ENSMUSG00000025758	Plk4	protein_coding	1155.75	-0.543655	0.0755738	-7.1937	6.31e-13	1.84e-11	1119	1124	872	893	1400	1269	1086	1492
477	ENSMUSG00000040612	Ildr2	protein_coding	1802.94	-0.678152	0.0942697	-7.19374	6.3e-13	1.84e-11	1478	1639	1409	1334	2254	2251	1653	2342
478	ENSMUSG00000062248	Cks2	protein_coding	988.14	-0.587973	0.0818495	-7.18359	6.79e-13	1.97e-11	881	1025	721	737	1149	1139	1114	1118
479	ENSMUSG00000025161	Slc16a3	protein_coding	1659.24	0.666525	0.0928523	7.17834	7.06e-13	2.05e-11	2398	2426	1658	2187	1129	1234	1269	1245
480	ENSMUSG00000027984	Hadh	protein_coding	806.469	-0.734199	0.102329	-7.17492	7.24e-13	2.09e-11	606	741	613	595	1086	897	886	975
481	ENSMUSG00000020181	Nav3	protein_coding	872.975	0.673114	0.0938926	7.16898	7.56e-13	2.18e-11	1297	1338	935	1019	676	664	486	754
482	ENSMUSG00000034958	Atcay	protein_coding	1620.45	0.478731	0.0668067	7.16591	7.73e-13	2.23e-11	2374	2328	1638	1744	1273	1289	1296	1299
483	ENSMUSG00000041845	Rhod	protein_coding	57.8547	-1.84782	0.258035	-7.16113	8e-13	2.3e-11	16	31	28	30	100	85	74	86
484	ENSMUSG00000050587	Lrrc4c	protein_coding	161.47	-1.05429	0.147241	-7.16031	8.05e-13	2.31e-11	107	121	113	102	233	223	182	193
485	ENSMUSG00000016624	Phf21b	protein_coding	1638.76	0.447123	0.062461	7.15844	8.16e-13	2.33e-11	2487	2148	1614	1845	1336	1307	1276	1369
486	ENSMUSG00000042988	Notum	protein_coding	63.8366	-2.56961	0.358953	-7.15863	8.15e-13	2.33e-11	18	17	25	17	149	139	37	98
487	ENSMUSG00000032549	Rab6b	protein_coding	4378.25	0.385667	0.053918	7.15283	8.5e-13	2.42e-11	6090	5890	4386	4806	3532	3632	3481	3826
488	ENSMUSG00000027309	4930402H24Rik	protein_coding	2523.96	0.462736	0.0647632	7.14505	9e-13	2.56e-11	3996	3291	2460	2810	2031	2084	1818	2174
489	ENSMUSG00000035683	Melk	protein_coding	919.499	-0.53082	0.0744458	-7.13029	1e-12	2.85e-11	838	901	723	730	1068	1024	949	1105
490	ENSMUSG00000006585	Cdt1	protein_coding	735.094	-0.60109	0.0843361	-7.12732	1.02e-12	2.9e-11	673	687	563	558	912	840	840	781
491	ENSMUSG00000022619	Mapk8ip2	protein_coding	2342.93	0.418378	0.0587088	7.12632	1.03e-12	2.92e-11	3451	3080	2356	2574	1974	1813	1891	1965
492	ENSMUSG00000021253	Tgfb3	protein_coding	279.332	-0.967823	0.135823	-7.1256	1.04e-12	2.93e-11	181	207	212	192	339	377	326	365
493	ENSMUSG00000022054	Nefm	protein_coding	9972.28	0.503662	0.0707213	7.12179	1.07e-12	3e-11	15459	12979	9985	11617	8649	7038	7139	8698
494	ENSMUSG00000000751	Rpa1	protein_coding	1636.45	-0.538648	0.0757157	-7.11409	1.13e-12	3.17e-11	1486	1590	1299	1283	2040	1812	1770	1767
495	ENSMUSG00000023505	Cdca3	protein_coding	1572.58	-0.518368	0.0728837	-7.11227	1.14e-12	3.2e-11	1547	1522	1276	1159	1884	1691	1774	1703
496	ENSMUSG00000029910	Mad2l1	protein_coding	1553.1	-0.497862	0.0700487	-7.10737	1.18e-12	3.31e-11	1440	1575	1247	1208	1837	1721	1535	1853
497	ENSMUSG00000015846	Rxra	protein_coding	822.305	-0.657392	0.0925812	-7.10071	1.24e-12	3.47e-11	672	767	655	604	1039	897	871	1035
498	ENSMUSG00000053192	Mllt11	protein_coding	4227.18	0.477561	0.0674242	7.08294	1.41e-12	3.94e-11	6319	5915	4315	4538	3326	3156	3489	3476
499	ENSMUSG00000024232	Bambi	protein_coding	164.201	-0.973757	0.137587	-7.07738	1.47e-12	4.08e-11	123	129	110	108	239	184	192	215
500	ENSMUSG00000029096	Htra3	protein_coding	58.6301	1.87716	0.265237	7.07728	1.47e-12	4.08e-11	90	96	109	90	29	29	13	25
501	ENSMUSG00000028681	Ptch2	protein_coding	229.421	-1.0305	0.145653	-7.075	1.49e-12	4.14e-11	241	139	139	130	280	277	296	321
502	ENSMUSG00000031297	Slc7a3	protein_coding	60.251	-1.94576	0.275375	-7.06584	1.6e-12	4.42e-11	42	21	14	30	71	83	98	112
503	ENSMUSG00000064065	Ipcef1	protein_coding	171.302	-1.06508	0.150794	-7.06313	1.63e-12	4.5e-11	127	137	109	99	205	266	170	246
504	ENSMUSG00000033419	Snap91	protein_coding	2059.35	0.450838	0.0638602	7.05977	1.67e-12	4.6e-11	2950	2908	2067	2251	1639	1585	1634	1774
505	ENSMUSG00000004360	9330159F19Rik	protein_coding	1759.24	0.489815	0.069636	7.03393	2.01e-12	5.52e-11	2816	2362	1785	1868	1387	1337	1293	1571
506	ENSMUSG00000028884	Rpa2	protein_coding	1296.61	-0.590783	0.0839997	-7.03316	2.02e-12	5.54e-11	1115	1229	1035	998	1552	1410	1484	1487
507	ENSMUSG00000024502	Jakmip2	protein_coding	1087.68	0.454726	0.0646583	7.03275	2.03e-12	5.55e-11	1573	1526	1130	1153	907	917	753	931
508	ENSMUSG00000033618	Map3k13	protein_coding	649.195	0.731789	0.104068	7.03186	2.04e-12	5.57e-11	999	933	734	790	493	514	330	535
509	ENSMUSG00000032224	Fam81a	protein_coding	159.349	-1.01884	0.145044	-7.02433	2.15e-12	5.87e-11	114	138	108	88	189	206	203	214
510	ENSMUSG00000020895	Tmem107	protein_coding	326.809	-0.749158	0.106699	-7.02122	2.2e-12	5.99e-11	284	298	234	222	390	397	406	365
511	ENSMUSG00000037306	Man1c1	protein_coding	934.517	0.523279	0.0746433	7.0104	2.38e-12	6.46e-11	1313	1290	975	1114	824	696	675	732
512	ENSMUSG00000027699	Ect2	protein_coding	2065.31	-0.491054	0.070073	-7.00775	2.42e-12	6.57e-11	1940	2098	1570	1692	2423	2398	1947	2460
513	ENSMUSG00000032667	Pon2	protein_coding	482.879	-0.677046	0.0966585	-7.00452	2.48e-12	6.71e-11	447	428	383	323	623	502	543	598
514	ENSMUSG00000023473	Celsr3	protein_coding	3627.53	0.709973	0.101434	6.99939	2.57e-12	6.95e-11	7119	4529	3740	4086	2663	2778	2247	2836
515	ENSMUSG00000036790	Slitrk2	protein_coding	111.589	-1.17599	0.168263	-6.98899	2.77e-12	7.47e-11	92	88	58	57	159	143	115	177
516	ENSMUSG00000018362	Kpna2	protein_coding	2344.91	-0.378411	0.054157	-6.9873	2.8e-12	7.54e-11	2455	2353	1925	1946	2759	2540	2266	2557
517	ENSMUSG00000020570	Sypl	protein_coding	521.072	-0.626768	0.0897202	-6.98581	2.83e-12	7.61e-11	494	473	411	366	665	650	512	590
518	ENSMUSG00000052133	Sema5b	protein_coding	718.048	0.57224	0.0819248	6.98494	2.85e-12	7.64e-11	1156	974	780	770	581	553	555	511
519	ENSMUSG00000021294	Kif26a	protein_coding	1143.17	0.54444	0.0781117	6.97002	3.17e-12	8.48e-11	1481	1595	1310	1353	912	876	846	910
520	ENSMUSG00000033577	Myo6	protein_coding	492.501	0.778553	0.111752	6.96682	3.24e-12	8.64e-11	895	654	540	585	371	382	257	381
521	ENSMUSG00000033948	Zswim5	protein_coding	1945.87	0.437696	0.0628251	6.96691	3.24e-12	8.64e-11	2602	2742	2028	2164	1661	1552	1395	1707
522	ENSMUSG00000064326	Siva1	protein_coding	530.326	-0.645118	0.0926288	-6.96455	3.29e-12	8.77e-11	484	533	384	366	666	557	604	640
523	ENSMUSG00000026468	Lhx4	protein_coding	466.118	0.674548	0.0969178	6.96001	3.4e-12	9.04e-11	654	702	548	533	331	379	334	323
524	ENSMUSG00000041406	BC055324	protein_coding	624.561	-0.588855	0.0846296	-6.95803	3.45e-12	9.15e-11	605	593	481	449	803	718	584	767
525	ENSMUSG00000047747	Rnf150	protein_coding	1378.33	-0.485769	0.069837	-6.95575	3.51e-12	9.28e-11	1352	1371	1109	1057	1579	1564	1300	1706
526	ENSMUSG00000031486	Adgra2	protein_coding	142.87	-1.18214	0.170161	-6.94721	3.73e-12	9.84e-11	99	87	85	98	246	187	157	168
527	ENSMUSG00000019942	Cdk1	protein_coding	2040.32	-0.588637	0.0847516	-6.94544	3.77e-12	9.94e-11	1715	2060	1600	1531	2534	2248	2257	2303
528	ENSMUSG00000015222	Map2	protein_coding	9447.23	0.523121	0.0754238	6.93576	4.04e-12	1.06e-10	15171	13041	9237	10471	7778	7588	5949	8381
529	ENSMUSG00000025959	Klf7	protein_coding	2215.73	0.609246	0.0879283	6.9289	4.24e-12	1.11e-10	3574	3040	2374	2486	1900	1821	1242	1768
530	ENSMUSG00000035566	Pcdh17	protein_coding	753.202	-0.558157	0.0805718	-6.92745	4.28e-12	1.12e-10	716	732	550	597	831	823	793	976
531	ENSMUSG00000051502	Ufsp1	protein_coding	114.613	1.1299	0.163144	6.9258	4.34e-12	1.13e-10	201	191	134	148	71	54	74	75
532	ENSMUSG00000016346	Kcnq2	protein_coding	2173.48	0.503881	0.0727784	6.92349	4.41e-12	1.15e-10	3639	2794	2142	2393	1741	1736	1553	1836
533	ENSMUSG00000039913	Pak7	protein_coding	677.807	0.512857	0.0741027	6.9209	4.49e-12	1.17e-10	989	979	687	756	538	535	487	573
534	ENSMUSG00000041431	Ccnb1	protein_coding	1662.59	-0.448171	0.064919	-6.90354	5.07e-12	1.32e-10	1603	1673	1344	1353	1942	1756	1690	1934
535	ENSMUSG00000022893	Adamts1	protein_coding	588.744	-0.631906	0.0915541	-6.902	5.13e-12	1.33e-10	601	524	406	445	777	695	534	737
536	ENSMUSG00000042489	Clspn	protein_coding	1361.22	-0.542862	0.0786756	-6.90001	5.2e-12	1.35e-10	1241	1284	1100	1069	1577	1686	1304	1601
537	ENSMUSG00000022261	Sdc2	protein_coding	341.055	-0.776705	0.112675	-6.8933	5.45e-12	1.41e-10	278	272	263	249	474	414	340	418
538	ENSMUSG00000006398	Cdc20	protein_coding	1509.02	-0.521092	0.0756188	-6.89104	5.54e-12	1.43e-10	1378	1488	1145	1247	1827	1626	1654	1670
539	ENSMUSG00000055653	Gpc3	protein_coding	289.351	-0.866238	0.125766	-6.88771	5.67e-12	1.46e-10	201	281	190	198	357	378	334	355
540	ENSMUSG00000032289	Thsd4	protein_coding	77.0036	-1.36504	0.198634	-6.87213	6.33e-12	1.62e-10	52	61	37	35	98	101	98	127
541	ENSMUSG00000031821	Gins2	protein_coding	400.249	-0.656641	0.0955662	-6.87106	6.37e-12	1.63e-10	366	341	304	307	510	429	452	475
542	ENSMUSG00000022678	Nde1	protein_coding	1932.91	-0.442312	0.0644705	-6.8607	6.85e-12	1.75e-10	1877	1942	1601	1540	2310	2136	1936	2117
543	ENSMUSG00000043065	Spice1	protein_coding	528.846	-0.532009	0.0775706	-6.85838	6.96e-12	1.78e-10	559	508	387	397	651	588	548	601
544	ENSMUSG00000094910	D430019H16Rik	protein_coding	3563.83	0.424153	0.0619238	6.84959	7.41e-12	1.89e-10	4792	4979	3790	3836	2790	2890	2807	3112
545	ENSMUSG00000030519	Apba2	protein_coding	3290.31	0.362707	0.0529699	6.84741	7.52e-12	1.91e-10	4596	4264	3271	3658	2794	2713	2654	2812
546	ENSMUSG00000031284	Pak3	protein_coding	3007.67	0.478227	0.0698767	6.84387	7.71e-12	1.96e-10	4457	4277	3057	3221	2428	2557	1957	2679
547	ENSMUSG00000030346	Rad51ap1	protein_coding	488.863	-0.584236	0.0854054	-6.84074	7.88e-12	2e-10	535	459	348	339	598	583	491	571
548	ENSMUSG00000062510	Nsl1	protein_coding	502.481	-0.578762	0.084633	-6.83849	8e-12	2.03e-10	483	480	381	374	654	565	513	567
549	ENSMUSG00000040433	Zbtb38	protein_coding	472.271	-0.62345	0.0913115	-6.82773	8.63e-12	2.18e-10	491	443	349	312	586	559	452	596
550	ENSMUSG00000021215	Net1	protein_coding	671.389	-0.580345	0.0850203	-6.82596	8.73e-12	2.2e-10	597	656	535	497	803	811	663	796
551	ENSMUSG00000025237	Parp6	protein_coding	2418.43	0.379439	0.0556103	6.82317	8.91e-12	2.24e-10	3573	3174	2396	2569	2063	2009	1952	1989
552	ENSMUSG00000035390	Brsk1	protein_coding	1718.69	0.47478	0.069594	6.82213	8.97e-12	2.25e-10	2405	2297	1861	1940	1326	1319	1407	1421
553	ENSMUSG00000025427	Rnf165	protein_coding	3029.36	0.355213	0.0520858	6.81977	9.12e-12	2.28e-10	4163	3966	3005	3366	2605	2548	2288	2709
554	ENSMUSG00000032118	Fez1	protein_coding	1831.01	0.506845	0.0743172	6.82003	9.1e-12	2.28e-10	2608	2683	1837	2064	1374	1423	1472	1488
555	ENSMUSG00000074657	Kif5a	protein_coding	6224.13	0.371769	0.0545397	6.81648	9.33e-12	2.33e-10	9390	8173	6067	6510	5260	5284	4571	5620
556	ENSMUSG00000026335	Pam	protein_coding	1937.11	0.351765	0.0516397	6.8119	9.63e-12	2.4e-10	2680	2494	1987	2097	1684	1624	1533	1650
557	ENSMUSG00000024812	Tjp2	protein_coding	1063.85	-0.585701	0.0860198	-6.80891	9.83e-12	2.45e-10	912	1022	882	784	1218	1252	1099	1303
558	ENSMUSG00000040389	Wdr47	protein_coding	1588.57	0.399477	0.058688	6.8068	9.98e-12	2.48e-10	2254	2152	1626	1692	1324	1381	1135	1395
559	ENSMUSG00000051344	Plekhm3	protein_coding	802.992	-0.629785	0.0925339	-6.80599	1e-11	2.49e-10	698	772	611	596	898	1022	772	1037
560	ENSMUSG00000020882	Cacnb1	protein_coding	900.232	0.461375	0.0677987	6.80506	1.01e-11	2.5e-10	1341	1229	918	976	733	695	711	749
561	ENSMUSG00000024462	Gabbr1	protein_coding	4389.51	0.449527	0.0661004	6.80068	1.04e-11	2.57e-10	6830	5929	4318	4695	3419	3547	3563	3599
562	ENSMUSG00000034336	Ina	protein_coding	16119.5	0.408179	0.0600267	6.79996	1.05e-11	2.58e-10	22605	21917	16011	17976	13106	12670	13329	13639
563	ENSMUSG00000029651	Mtus2	protein_coding	1301.87	0.43615	0.0641558	6.79829	1.06e-11	2.61e-10	1928	1641	1325	1494	1124	1021	981	1097
564	ENSMUSG00000024109	Nrxn1	protein_coding	1204.81	0.448985	0.0662259	6.7796	1.21e-11	2.96e-10	1808	1637	1230	1284	953	999	858	1083
565	ENSMUSG00000038453	Srcin1	protein_coding	1159.69	0.528976	0.0780673	6.7759	1.24e-11	3.03e-10	1920	1554	1203	1215	877	908	908	924
566	ENSMUSG00000024913	Lrp5	protein_coding	2115.1	-0.376363	0.0556562	-6.76228	1.36e-11	3.33e-10	2220	2179	1693	1754	2496	2280	2091	2253
567	ENSMUSG00000015647	Lama5	protein_coding	155.566	-1.44387	0.213556	-6.76107	1.37e-11	3.35e-10	117	86	86	69	254	285	116	222
568	ENSMUSG00000030123	Plxnd1	protein_coding	799.36	-0.874145	0.129402	-6.75526	1.43e-11	3.48e-10	515	632	628	581	1045	901	1005	984
569	ENSMUSG00000028347	Tmeff1	protein_coding	5872.9	0.360974	0.0534441	6.75424	1.44e-11	3.5e-10	8055	8033	5875	6249	4968	4721	4551	5386
570	ENSMUSG00000030341	Tnfrsf1a	protein_coding	162.068	-1.01268	0.149984	-6.75188	1.46e-11	3.55e-10	121	137	88	112	253	177	190	208
571	ENSMUSG00000033949	Trim36	protein_coding	1273.53	0.464524	0.0688043	6.75139	1.46e-11	3.56e-10	1847	1816	1257	1406	1079	1057	861	1097
572	ENSMUSG00000072082	Ccnf	protein_coding	1244.88	-0.485166	0.0718934	-6.74842	1.49e-11	3.62e-10	1194	1225	984	1005	1573	1345	1252	1375
573	ENSMUSG00000024989	Cep55	protein_coding	709.968	-0.535522	0.0793831	-6.74604	1.52e-11	3.67e-10	715	640	597	514	857	816	703	833
574	ENSMUSG00000031748	Gnao1	protein_coding	3904.97	0.397674	0.0589488	6.74609	1.52e-11	3.67e-10	5470	5332	3902	4264	3158	3078	3118	3493
575	ENSMUSG00000009739	Pou6f1	protein_coding	612.743	0.608286	0.0903437	6.73302	1.66e-11	4.01e-10	981	862	680	649	410	485	462	492
576	ENSMUSG00000032254	Kif23	protein_coding	1482.31	-0.49314	0.0732527	-6.73203	1.67e-11	4.03e-10	1416	1471	1231	1115	1722	1700	1404	1800
577	ENSMUSG00000031391	L1cam	protein_coding	5071.92	0.440773	0.0654851	6.73089	1.69e-11	4.05e-10	8109	6700	4825	5498	4109	4258	3874	4169
578	ENSMUSG00000021680	Crhbp	protein_coding	129.529	-3.70509	0.550537	-6.72997	1.7e-11	4.07e-10	30	19	13	18	492	138	90	218
579	ENSMUSG00000021936	Mapk8	protein_coding	2394.78	0.327171	0.0486143	6.72993	1.7e-11	4.07e-10	3326	3116	2502	2434	2107	2074	1846	2082
580	ENSMUSG00000033209	Ttc28	protein_coding	4265.76	0.472391	0.0703446	6.71538	1.88e-11	4.48e-10	5763	6078	4389	4890	3493	3530	2828	3822
581	ENSMUSG00000096999	Gm26793	antisense	135.274	-1.09423	0.163036	-6.71157	1.93e-11	4.6e-10	107	84	87	88	195	206	132	172
582	ENSMUSG00000095139	Pou3f2	protein_coding	707.692	0.575637	0.0857894	6.70988	1.95e-11	4.64e-10	1136	997	694	811	504	549	529	585
583	ENSMUSG00000039328	Rnf122	protein_coding	702.912	0.480251	0.0715791	6.70937	1.95e-11	4.65e-10	1043	966	741	752	553	552	546	587
584	ENSMUSG00000031995	St14	protein_coding	39.7796	-2.1049	0.313898	-6.70569	2e-11	4.76e-10	10	21	20	12	48	68	60	69
585	ENSMUSG00000068748	Ptprz1	protein_coding	2139.06	0.575897	0.0859387	6.70126	2.07e-11	4.9e-10	3474	3044	2067	2434	1571	1823	1351	1826
586	ENSMUSG00000033740	St18	protein_coding	579.924	0.698572	0.104333	6.69557	2.15e-11	5.08e-10	1053	787	629	625	393	466	359	473
587	ENSMUSG00000063160	Numbl	protein_coding	1153.35	0.494663	0.0739409	6.68999	2.23e-11	5.27e-10	1682	1602	1161	1320	961	870	932	883
588	ENSMUSG00000030772	Dkk3	protein_coding	16234.2	-0.5007	0.0748916	-6.68566	2.3e-11	5.42e-10	14338	15985	13118	13375	19366	19055	15635	18660
589	ENSMUSG00000041708	Mpped1	protein_coding	79.384	-1.46361	0.21899	-6.68346	2.33e-11	5.49e-10	37	54	38	49	107	90	122	123
590	ENSMUSG00000048277	Syngr2	protein_coding	177.953	-0.920542	0.137781	-6.68121	2.37e-11	5.57e-10	136	140	124	121	261	200	215	211
591	ENSMUSG00000035298	Klhl35	protein_coding	93.4608	1.22252	0.183032	6.67928	2.4e-11	5.63e-10	195	135	112	121	54	60	52	48
592	ENSMUSG00000048402	Gli2	protein_coding	736.053	-0.58404	0.0874638	-6.67751	2.43e-11	5.69e-10	690	648	575	585	943	869	678	889
593	ENSMUSG00000024833	Pola2	protein_coding	856.398	-0.502538	0.075285	-6.67514	2.47e-11	5.78e-10	853	775	688	693	1041	893	912	982
594	ENSMUSG00000036885	Arhgef26	protein_coding	190.465	-0.957305	0.143554	-6.66859	2.58e-11	6.03e-10	138	184	117	114	224	228	229	278
595	ENSMUSG00000064080	Fbln2	protein_coding	71.3034	-1.32751	0.199746	-6.64599	3.01e-11	7.02e-10	61	46	34	34	92	94	99	104
596	ENSMUSG00000031511	Arhgef7	protein_coding	3154.34	0.345013	0.0519546	6.64065	3.12e-11	7.27e-10	4325	4074	3176	3468	2790	2558	2413	2850
597	ENSMUSG00000036223	Ska1	protein_coding	229.972	-0.738402	0.11123	-6.63852	3.17e-11	7.36e-10	203	206	165	160	294	259	265	278
598	ENSMUSG00000031626	Sorbs2	protein_coding	2009.75	-0.42238	0.063694	-6.63139	3.33e-11	7.71e-10	2382	1941	1473	1585	2315	2271	1974	2233
599	ENSMUSG00000040717	Il17rd	protein_coding	318.548	-0.783514	0.118248	-6.62604	3.45e-11	7.98e-10	276	259	233	226	423	425	284	412
600	ENSMUSG00000066551	Hmgb1	protein_coding	6002.26	-0.372337	0.056203	-6.62486	3.48e-11	8.03e-10	6117	6459	4723	5002	6596	6294	6196	6735
601	ENSMUSG00000017146	Brca1	protein_coding	1148.56	-0.575856	0.0869488	-6.62293	3.52e-11	8.13e-10	1071	1125	861	871	1425	1370	1010	1464
602	ENSMUSG00000020451	Limk2	protein_coding	2744.95	0.334924	0.0505842	6.62111	3.57e-11	8.21e-10	3952	3545	2840	2761	2442	2272	2198	2349
603	ENSMUSG00000006445	Epha2	protein_coding	341.51	-0.765993	0.115728	-6.6189	3.62e-11	8.32e-10	257	304	239	268	406	407	415	407
604	ENSMUSG00000028614	Ndc1	protein_coding	1075.18	-0.455298	0.0688008	-6.61763	3.65e-11	8.38e-10	1075	1146	838	815	1278	1197	1067	1207
605	ENSMUSG00000042506	Usp22	protein_coding	7572.72	0.310978	0.0470033	6.6161	3.69e-11	8.45e-10	10180	9986	7471	8135	6929	6318	5904	6657
606	ENSMUSG00000029363	Rfc5	protein_coding	780.454	-0.522369	0.0789958	-6.61263	3.78e-11	8.64e-10	775	763	635	558	957	867	843	841
607	ENSMUSG00000011884	Gltp	protein_coding	506.835	-0.590625	0.0894015	-6.60643	3.94e-11	8.98e-10	472	512	395	347	585	586	522	633
608	ENSMUSG00000049100	Pcdh10	protein_coding	415.824	0.636871	0.0964013	6.60646	3.94e-11	8.98e-10	610	596	492	457	313	295	328	302
609	ENSMUSG00000025422	Agap2	protein_coding	560.131	0.651644	0.0986604	6.60492	3.98e-11	9.06e-10	1023	763	566	606	422	422	391	429
610	ENSMUSG00000038668	Lpar1	protein_coding	514.624	0.704344	0.10665	6.60426	3.99e-11	9.08e-10	806	707	605	601	455	411	289	344
611	ENSMUSG00000037892	Pcdh18	protein_coding	543.231	0.69432	0.105155	6.60285	4.03e-11	9.15e-10	827	825	570	652	427	417	288	460
612	ENSMUSG00000036915	Kirrel2	protein_coding	191.699	-0.947144	0.143593	-6.59604	4.22e-11	9.57e-10	169	180	95	121	277	262	202	226
613	ENSMUSG00000022814	Umps	protein_coding	996.912	-0.579587	0.0878852	-6.59482	4.26e-11	9.63e-10	854	1027	710	805	1236	1084	1036	1205
614	ENSMUSG00000041219	Arhgap11a	protein_coding	2125.41	-0.608607	0.0923016	-6.59367	4.29e-11	9.69e-10	1856	1939	1679	1646	2454	2676	1915	2786
615	ENSMUSG00000024754	Tmem2	protein_coding	3908.8	0.445467	0.0676124	6.58854	4.44e-11	1e-09	5567	5240	3959	4465	3491	3154	2567	3464
616	ENSMUSG00000029730	Mcm7	protein_coding	3845.67	-0.352262	0.0535338	-6.58018	4.7e-11	1.06e-09	3973	3908	3131	3345	4378	4075	3827	4174
617	ENSMUSG00000096014	Sox1	protein_coding	269.825	1.14145	0.173572	6.57623	4.83e-11	1.08e-09	392	434	364	377	233	122	159	128
618	ENSMUSG00000032714	Syde1	protein_coding	362.228	-0.637417	0.0969499	-6.5747	4.88e-11	1.09e-09	329	327	279	269	463	410	404	403
619	ENSMUSG00000022707	Gbe1	protein_coding	480.656	-0.641457	0.0975793	-6.5737	4.91e-11	1.1e-09	424	440	366	364	613	581	442	606
620	ENSMUSG00000035958	Tdp2	protein_coding	953.489	-0.420738	0.0640937	-6.56442	5.22e-11	1.17e-09	1063	954	715	760	1058	1026	987	1094
621	ENSMUSG00000002341	Ncan	protein_coding	1737.76	0.520281	0.0792683	6.56355	5.25e-11	1.17e-09	2804	2409	1659	1940	1268	1392	1338	1442
622	ENSMUSG00000015112	Slc25a13	protein_coding	393.908	-0.619729	0.0944379	-6.5623	5.3e-11	1.18e-09	386	367	274	300	510	416	399	500
623	ENSMUSG00000079553	Kifc1	protein_coding	518.88	-0.519142	0.0791793	-6.55654	5.51e-11	1.23e-09	533	492	382	413	608	558	567	597
624	ENSMUSG00000029381	Shroom3	protein_coding	812.484	-0.486583	0.0742903	-6.54976	5.76e-11	1.28e-09	772	790	641	670	986	890	815	928
625	ENSMUSG00000038738	Shank1	protein_coding	710.7	0.671263	0.102579	6.5439	5.99e-11	1.33e-09	1318	936	732	784	494	526	481	593
626	ENSMUSG00000038916	Soga3	protein_coding	2721.71	0.478728	0.0732512	6.53543	6.34e-11	1.41e-09	4061	3742	2745	3022	2309	2096	1775	2530
627	ENSMUSG00000032218	Ccnb2	protein_coding	980.732	-0.501218	0.0768296	-6.52377	6.86e-11	1.52e-09	905	1015	763	770	1185	1074	1036	1088
628	ENSMUSG00000033152	Podxl2	protein_coding	2378.87	0.391376	0.0600266	6.52005	7.03e-11	1.55e-09	3405	3109	2409	2603	1951	1985	1966	1934
629	ENSMUSG00000040618	Pck2	protein_coding	275.149	-0.729925	0.111962	-6.51941	7.06e-11	1.56e-09	242	230	223	183	348	306	304	351
630	ENSMUSG00000027496	Aurka	protein_coding	797.075	-0.508041	0.0780432	-6.50974	7.53e-11	1.66e-09	759	792	629	619	954	825	871	917
631	ENSMUSG00000028223	Decr1	protein_coding	394.728	-0.581482	0.0894833	-6.49822	8.13e-11	1.79e-09	387	368	284	309	454	442	450	456
632	ENSMUSG00000029661	Col1a2	protein_coding	57.5278	-1.97821	0.304908	-6.48787	8.71e-11	1.91e-09	13	24	24	35	115	84	81	69
633	ENSMUSG00000099907	Gm10421	processed_transcript	80.1867	1.47868	0.227914	6.4879	8.7e-11	1.91e-09	196	114	104	98	46	42	25	50
634	ENSMUSG00000084883	Ccdc85c	protein_coding	1227.85	-0.547907	0.0845691	-6.4788	9.25e-11	2.02e-09	1091	1261	906	981	1476	1258	1355	1470
635	ENSMUSG00000025747	Tyms	protein_coding	1032.21	-0.449454	0.0693981	-6.47645	9.39e-11	2.05e-09	1014	1052	840	808	1242	1153	1017	1138
636	ENSMUSG00000084910	C630043F03Rik	processed_transcript	306.167	0.727806	0.112381	6.47623	9.4e-11	2.05e-09	523	473	324	327	259	224	185	215
637	ENSMUSG00000038943	Prc1	protein_coding	2962.84	-0.384528	0.05941	-6.47246	9.64e-11	2.1e-09	2955	3144	2433	2405	3357	3259	2831	3370
638	ENSMUSG00000046668	Cxxc5	protein_coding	4241.39	-0.415297	0.0641976	-6.46905	9.86e-11	2.14e-09	4183	4442	3367	3475	4788	4337	4566	4779
639	ENSMUSG00000029166	Mapre3	protein_coding	644.334	0.667186	0.103251	6.46177	1.03e-10	2.25e-09	1205	839	657	714	465	483	463	488
640	ENSMUSG00000011832	Evi5l	protein_coding	1162.22	0.397992	0.0616254	6.45825	1.06e-10	2.3e-09	1738	1538	1204	1182	961	967	891	1009
641	ENSMUSG00000045348	Nyap1	protein_coding	1449.16	0.448204	0.069465	6.45223	1.1e-10	2.38e-09	2079	1974	1481	1608	1191	1085	1199	1192
642	ENSMUSG00000042029	Ncapg2	protein_coding	1171.62	-0.514366	0.079745	-6.45013	1.12e-10	2.41e-09	1125	1207	881	903	1329	1447	1081	1415
643	ENSMUSG00000026614	Slc30a10	protein_coding	657.836	0.648613	0.10065	6.44423	1.16e-10	2.51e-09	1171	950	687	666	467	550	441	499
644	ENSMUSG00000008090	Fgfrl1	protein_coding	398.083	-0.675425	0.10496	-6.43509	1.23e-10	2.66e-09	320	381	290	308	527	458	415	469
645	ENSMUSG00000021198	Unc79	protein_coding	775.714	0.572294	0.0890412	6.42729	1.3e-10	2.79e-09	1264	1045	771	902	612	621	479	677
646	ENSMUSG00000019564	Arid3a	protein_coding	679.564	-0.575792	0.0896758	-6.42082	1.36e-10	2.91e-09	613	654	495	556	802	755	658	895
647	ENSMUSG00000033214	Slitrk5	protein_coding	600.511	0.503107	0.0783806	6.41877	1.37e-10	2.94e-09	862	846	612	688	525	466	414	494
648	ENSMUSG00000039055	Eme1	protein_coding	404.124	-0.574325	0.0895054	-6.41665	1.39e-10	2.98e-09	393	377	292	322	514	472	403	458
649	ENSMUSG00000027562	Car2	protein_coding	450.78	-0.800496	0.12479	-6.41476	1.41e-10	3.01e-09	349	419	312	315	476	505	607	585
650	ENSMUSG00000040848	Sft2d2	protein_coding	419.602	-0.719407	0.11216	-6.41414	1.42e-10	3.02e-09	343	382	323	296	559	506	383	552
651	ENSMUSG00000021775	Nr1d2	protein_coding	648.594	-0.597785	0.0932074	-6.4135	1.42e-10	3.03e-09	571	642	481	500	756	781	608	843
652	ENSMUSG00000024256	Adcyap1	protein_coding	337.332	0.644931	0.100571	6.4127	1.43e-10	3.04e-09	517	475	343	422	248	241	248	266
653	ENSMUSG00000036777	Anln	protein_coding	1230.77	-0.42387	0.0661418	-6.40851	1.47e-10	3.12e-09	1243	1256	975	1004	1463	1345	1149	1435
654	ENSMUSG00000028312	Smc2	protein_coding	2609.83	-0.500225	0.078109	-6.40419	1.51e-10	3.2e-09	2509	2596	2089	2001	3130	3071	2295	3218
655	ENSMUSG00000062960	Kdr	protein_coding	3517.54	-0.485933	0.0758765	-6.40425	1.51e-10	3.2e-09	3120	3651	2778	2870	3916	3882	3641	4219
656	ENSMUSG00000029798	Herc6	protein_coding	72.7644	-1.2858	0.200796	-6.40353	1.52e-10	3.21e-09	60	49	38	35	95	119	81	100
657	ENSMUSG00000023027	Atf1	protein_coding	574.13	-0.586886	0.0917336	-6.39773	1.58e-10	3.33e-09	504	543	474	423	708	623	627	669
658	ENSMUSG00000053110	Yap1	protein_coding	1617.39	-0.590128	0.0922799	-6.39498	1.61e-10	3.38e-09	1398	1489	1294	1274	2175	1843	1489	1937
659	ENSMUSG00000029094	Afap1	protein_coding	1799.77	0.427363	0.0669114	6.387	1.69e-10	3.56e-09	2847	2335	1791	1896	1593	1527	1298	1448
660	ENSMUSG00000027220	Syt13	protein_coding	3234.98	0.346954	0.0543447	6.38432	1.72e-10	3.61e-09	4481	4328	3150	3517	2905	2622	2585	2751
661	ENSMUSG00000105263	Gm42427	TEC	2269.34	0.456389	0.0714847	6.38443	1.72e-10	3.61e-09	3468	3046	2277	2464	1686	2028	1685	1898
662	ENSMUSG00000046591	Ticrr	protein_coding	919.385	-0.552947	0.0866317	-6.38274	1.74e-10	3.64e-09	862	896	712	701	1130	1113	814	1131
663	ENSMUSG00000021943	Gdf10	protein_coding	40.3526	1.79095	0.280764	6.37885	1.78e-10	3.73e-09	94	73	52	52	18	14	21	16
664	ENSMUSG00000058153	Sez6l	protein_coding	1939.88	0.435934	0.0684791	6.36595	1.94e-10	4.05e-09	2865	2608	1915	2159	1457	1661	1469	1702
665	ENSMUSG00000025085	Ablim1	protein_coding	2466.65	0.374851	0.0588964	6.36457	1.96e-10	4.08e-09	3525	3269	2414	2703	2109	2066	1770	2267
666	ENSMUSG00000027612	Mmp24	protein_coding	1218.34	0.454254	0.071371	6.36468	1.96e-10	4.08e-09	1678	1771	1230	1339	968	951	955	1045
667	ENSMUSG00000032562	Gnai2	protein_coding	7870.38	-0.473024	0.0743257	-6.3642	1.96e-10	4.08e-09	7260	7937	6181	6561	9193	8378	8809	8450
668	ENSMUSG00000062961	Ccdc177	protein_coding	455.275	0.555627	0.0873611	6.36011	2.02e-10	4.19e-09	665	592	512	535	360	364	300	384
669	ENSMUSG00000024151	Msh2	protein_coding	1898.97	-0.384791	0.0605124	-6.35887	2.03e-10	4.21e-09	1918	2018	1495	1586	2143	1988	1923	2151
670	ENSMUSG00000024201	Kdm4b	protein_coding	2001.27	0.40947	0.0644039	6.35785	2.05e-10	4.24e-09	3003	2657	1919	2209	1772	1616	1572	1597
671	ENSMUSG00000063661	Krt73	protein_coding	418.458	-0.725191	0.114124	-6.35442	2.09e-10	4.32e-09	362	379	331	268	442	505	523	511
672	ENSMUSG00000091475	2810468N07Rik	processed_transcript	70.4305	-1.62744	0.256164	-6.3531	2.11e-10	4.36e-09	28	54	29	35	83	91	127	101
673	ENSMUSG00000024791	Cdca5	protein_coding	644.885	-0.595416	0.093749	-6.35117	2.14e-10	4.4e-09	562	635	504	479	798	668	737	753
674	ENSMUSG00000004231	Pax2	protein_coding	42.7067	-1.72807	0.272248	-6.34739	2.19e-10	4.51e-09	24	28	15	18	76	56	66	52
675	ENSMUSG00000041193	Pla2g5	protein_coding	75.5156	-1.47625	0.232606	-6.34658	2.2e-10	4.52e-09	30	57	44	37	110	120	104	88
676	ENSMUSG00000024598	Fbn2	protein_coding	1438.99	-1.81641	0.286236	-6.34586	2.21e-10	4.54e-09	675	662	613	721	2706	2653	1064	2235
677	ENSMUSG00000001467	Cyp51	protein_coding	4599.96	0.384123	0.0605758	6.3412	2.28e-10	4.67e-09	6375	6484	4576	4851	3776	3637	3702	4099
678	ENSMUSG00000021097	Clmn	protein_coding	785.804	0.644534	0.101651	6.34068	2.29e-10	4.68e-09	1192	1112	928	858	680	625	418	630
679	ENSMUSG00000029710	Ephb4	protein_coding	360.682	-0.808923	0.127636	-6.33775	2.33e-10	4.76e-09	259	306	246	293	517	448	366	424
680	ENSMUSG00000035305	Ror1	protein_coding	163.208	-0.988446	0.155981	-6.33696	2.34e-10	4.78e-09	116	134	110	104	220	232	146	234
681	ENSMUSG00000048285	Frmd6	protein_coding	218.563	-0.801234	0.126692	-6.32427	2.54e-10	5.18e-09	175	184	170	146	309	248	236	267
682	ENSMUSG00000038732	Mboat1	protein_coding	118.114	-1.07091	0.169527	-6.317	2.67e-10	5.42e-09	97	97	62	71	131	154	134	193
683	ENSMUSG00000042599	Kdm7a	protein_coding	2148.91	0.64931	0.102828	6.31455	2.71e-10	5.5e-09	3476	3134	2241	2423	1574	1784	1150	1913
684	ENSMUSG00000030287	Itpr2	protein_coding	151.247	-1.01477	0.160798	-6.31086	2.77e-10	5.63e-09	125	119	103	81	191	227	138	220
685	ENSMUSG00000022978	Mis18a	protein_coding	442.021	-0.620225	0.0983189	-6.3083	2.82e-10	5.71e-09	395	394	348	339	499	472	504	564
686	ENSMUSG00000059146	Ntrk3	protein_coding	97.3948	1.21211	0.192148	6.3082	2.82e-10	5.71e-09	211	129	110	136	58	61	44	62
687	ENSMUSG00000045092	S1pr1	protein_coding	187.186	-0.83739	0.133035	-6.29453	3.08e-10	6.23e-09	145	139	144	138	239	230	209	236
688	ENSMUSG00000048895	Cdk5r1	protein_coding	4498.09	0.449158	0.0713909	6.29153	3.14e-10	6.34e-09	5847	6497	4795	4951	3427	3646	3531	3886
689	ENSMUSG00000027313	Chac1	protein_coding	54.0719	-1.76141	0.280044	-6.28976	3.18e-10	6.4e-09	42	28	20	17	54	96	90	77
690	ENSMUSG00000053965	Pde5a	protein_coding	617.986	-0.551172	0.0877702	-6.27972	3.39e-10	6.82e-09	616	592	478	454	784	699	558	773
691	ENSMUSG00000048015	Neurod4	protein_coding	3023.88	0.442635	0.0704955	6.27891	3.41e-10	6.84e-09	4355	4383	3140	3060	2471	2718	2063	2549
692	ENSMUSG00000014837	4931428F04Rik	protein_coding	1342.93	0.39251	0.0625214	6.27802	3.43e-10	6.87e-09	1912	1869	1319	1428	1144	1071	1065	1150
693	ENSMUSG00000019992	Mtfr2	protein_coding	188.292	-0.830226	0.132268	-6.27685	3.46e-10	6.91e-09	151	174	141	111	232	221	226	239
694	ENSMUSG00000043003	Rasef	protein_coding	61.0491	-1.81838	0.289692	-6.27695	3.45e-10	6.91e-09	33	32	38	12	103	108	55	100
695	ENSMUSG00000024238	Zeb1	protein_coding	1829.36	0.408338	0.0650664	6.27571	3.48e-10	6.95e-09	2607	2414	1822	2065	1565	1622	1262	1562
696	ENSMUSG00000030852	Tacc2	protein_coding	2309.24	0.434046	0.0692204	6.2705	3.6e-10	7.16e-09	3036	3102	2535	2586	1837	1847	1883	1910
697	ENSMUSG00000000861	Bcl11a	protein_coding	997.207	0.441786	0.070519	6.26477	3.73e-10	7.42e-09	1438	1380	995	1101	806	789	722	914
698	ENSMUSG00000058420	Syt17	protein_coding	96.7137	-1.06007	0.169272	-6.26252	3.79e-10	7.52e-09	66	84	56	61	133	124	112	130
699	ENSMUSG00000024053	Emilin2	protein_coding	143.511	0.936442	0.149564	6.26114	3.82e-10	7.57e-09	219	229	158	197	102	78	88	108
700	ENSMUSG00000026620	Mark1	protein_coding	1789.4	0.331141	0.0529435	6.25461	3.99e-10	7.89e-09	2490	2313	1779	1929	1570	1479	1418	1580
701	ENSMUSG00000031490	Eif4ebp1	protein_coding	200.75	-1.00328	0.160519	-6.25024	4.1e-10	8.1e-09	132	183	138	114	263	203	253	302
702	ENSMUSG00000006678	Pola1	protein_coding	1120.18	-0.543124	0.0869793	-6.24428	4.26e-10	8.4e-09	1013	1059	911	878	1267	1317	1047	1450
703	ENSMUSG00000029033	Acap3	protein_coding	1548.31	0.436855	0.0699843	6.24219	4.31e-10	8.5e-09	2364	2009	1588	1664	1338	1164	1269	1241
704	ENSMUSG00000040195	Nemp1	protein_coding	667.723	-0.551712	0.0884102	-6.24037	4.37e-10	8.59e-09	650	633	512	512	808	838	595	798
705	ENSMUSG00000053825	Ppfia2	protein_coding	1267.87	0.513872	0.0823908	6.23701	4.46e-10	8.76e-09	1818	1888	1278	1402	929	1078	860	1124
706	ENSMUSG00000036768	Kif15	protein_coding	1718.92	-0.422226	0.0676996	-6.23676	4.47e-10	8.76e-09	1873	1767	1312	1341	2007	1961	1533	2036
707	ENSMUSG00000036427	Gpi1	protein_coding	5166.62	0.480157	0.077006	6.23531	4.51e-10	8.83e-09	8332	6762	5034	5735	4501	4033	4114	3785
708	ENSMUSG00000027379	Bub1	protein_coding	1299.35	-0.439739	0.0705284	-6.23493	4.52e-10	8.84e-09	1385	1311	1043	976	1556	1457	1173	1540
709	ENSMUSG00000005338	Cadm3	protein_coding	3987.9	0.352378	0.0565258	6.23394	4.55e-10	8.87e-09	5796	5150	4062	4126	3188	3358	3236	3569
710	ENSMUSG00000037736	Limch1	protein_coding	962.179	0.539871	0.0866049	6.23372	4.55e-10	8.87e-09	1351	1325	1000	1174	685	764	675	869
711	ENSMUSG00000050732	Vamp8	protein_coding	101.138	-1.08852	0.174615	-6.23387	4.55e-10	8.87e-09	69	71	71	62	126	139	135	122
712	ENSMUSG00000027165	B230118H07Rik	protein_coding	670.234	-0.702843	0.112773	-6.23238	4.59e-10	8.93e-09	526	683	499	458	730	803	831	791
713	ENSMUSG00000047712	Ust	protein_coding	182.233	-0.949212	0.1523	-6.23251	4.59e-10	8.93e-09	149	161	129	93	290	220	195	214
714	ENSMUSG00000051236	Msrb3	protein_coding	124.996	-1.14526	0.183783	-6.23159	4.62e-10	8.96e-09	76	97	84	72	212	168	119	161
715	ENSMUSG00000019906	Lin7a	protein_coding	1463.63	0.485431	0.0781464	6.21182	5.24e-10	1.01e-08	2178	2066	1660	1410	1246	1197	962	1263
716	ENSMUSG00000034329	Brip1	protein_coding	380.475	-0.643001	0.103509	-6.21202	5.23e-10	1.01e-08	356	341	305	262	442	466	362	504
717	ENSMUSG00000036333	Kidins220	protein_coding	8002.22	0.430474	0.0693089	6.21095	5.27e-10	1.02e-08	10977	11256	8266	8706	6256	6734	5553	7521
718	ENSMUSG00000027641	Rbl1	protein_coding	1220.4	-0.468143	0.0753834	-6.21015	5.29e-10	1.02e-08	1235	1165	931	1027	1468	1447	1096	1410
719	ENSMUSG00000024900	Cpt1a	protein_coding	466.863	-0.552873	0.0890784	-6.20659	5.41e-10	1.04e-08	445	433	351	380	596	545	456	524
720	ENSMUSG00000032883	Acsl3	protein_coding	3571.6	-0.434782	0.0702154	-6.19212	5.94e-10	1.14e-08	3460	3786	2873	2810	3939	4239	3336	4179
721	ENSMUSG00000037846	Rtkn2	protein_coding	826.382	-0.455491	0.0736928	-6.18094	6.37e-10	1.22e-08	823	843	674	630	954	901	797	1000
722	ENSMUSG00000004642	Slbp	protein_coding	1765.54	-0.383295	0.0620184	-6.18034	6.4e-10	1.23e-08	1760	1850	1419	1488	1980	1874	1738	2037
723	ENSMUSG00000047409	Ctdspl	protein_coding	367.64	-0.578114	0.0935635	-6.17884	6.46e-10	1.24e-08	371	353	266	271	442	383	414	440
724	ENSMUSG00000007817	Zmiz1	protein_coding	7274.69	0.358602	0.0580397	6.17856	6.47e-10	1.24e-08	9927	9547	7290	8072	6504	6140	5112	6635
725	ENSMUSG00000041000	Trim62	protein_coding	539.756	0.570614	0.0923837	6.17656	6.55e-10	1.25e-08	738	826	552	636	452	389	396	420
726	ENSMUSG00000001403	Ube2c	protein_coding	1395.56	-0.539856	0.0874469	-6.17353	6.68e-10	1.27e-08	1200	1402	1098	1115	1723	1471	1545	1562
727	ENSMUSG00000038831	Ralgps1	protein_coding	1346.47	0.448339	0.0726296	6.17295	6.7e-10	1.28e-08	2182	1799	1310	1403	1108	1135	969	1140
728	ENSMUSG00000022812	Gsk3b	protein_coding	6080.15	0.406344	0.0658315	6.17248	6.72e-10	1.28e-08	8448	8374	6150	6627	5282	5107	4051	5584
729	ENSMUSG00000022269	2021-03-11	protein_coding	58.403	-1.53768	0.249149	-6.17172	6.75e-10	1.28e-08	36	44	23	26	107	82	53	93
730	ENSMUSG00000079110	Capn3	protein_coding	86.3041	1.27078	0.205965	6.1699	6.83e-10	1.29e-08	182	116	101	125	59	40	37	58
731	ENSMUSG00000050410	Tcf19	protein_coding	640.359	-0.564663	0.0915642	-6.16685	6.97e-10	1.32e-08	589	608	528	467	701	759	734	712
732	ENSMUSG00000027335	Adra1d	protein_coding	52.804	-2.12786	0.3451	-6.16591	7.01e-10	1.32e-08	10	37	27	9	74	76	82	95
733	ENSMUSG00000062661	Ncs1	protein_coding	2953.04	0.359067	0.0583038	6.15855	7.34e-10	1.39e-08	3965	4049	2993	3150	2552	2368	2423	2517
734	ENSMUSG00000036246	Gmip	protein_coding	532.977	0.818569	0.132999	6.15472	7.52e-10	1.42e-08	1150	697	534	582	375	381	342	375
735	ENSMUSG00000029121	Crmp1	protein_coding	15673.3	0.382495	0.0621803	6.15138	7.68e-10	1.45e-08	21747	21277	15391	17346	13061	12504	13232	12990
736	ENSMUSG00000017144	Rnd3	protein_coding	5035.46	0.468193	0.0761658	6.14703	7.89e-10	1.48e-08	6709	7131	5400	5624	3596	4232	3878	4391
737	ENSMUSG00000054920	Klhl5	protein_coding	643.959	0.514275	0.0836817	6.14561	7.97e-10	1.5e-08	863	917	735	704	491	495	487	548
738	ENSMUSG00000032431	Crtap	protein_coding	175.941	-0.864447	0.140831	-6.13821	8.35e-10	1.56e-08	136	153	106	135	258	196	198	215
739	ENSMUSG00000068876	Cgn	protein_coding	257.507	-1.22656	0.199874	-6.13666	8.43e-10	1.58e-08	205	189	148	121	415	454	179	344
740	ENSMUSG00000061533	Cep128	protein_coding	547.228	-0.543043	0.0885231	-6.13448	8.54e-10	1.6e-08	517	537	438	404	656	610	520	696
741	ENSMUSG00000068373	D430041D05Rik	protein_coding	473.009	0.595232	0.0970743	6.13172	8.69e-10	1.62e-08	755	645	517	521	334	381	301	425
742	ENSMUSG00000026094	Stk17b	protein_coding	292.804	-0.719509	0.117379	-6.1298	8.8e-10	1.64e-08	228	284	227	199	373	330	326	360
743	ENSMUSG00000038014	Fam120a	protein_coding	2643.74	-0.317983	0.0518934	-6.12761	8.92e-10	1.66e-08	2884	2855	2168	2148	3014	2823	2495	2876
744	ENSMUSG00000028528	Dnajc6	protein_coding	1458.03	0.452976	0.0739382	6.12641	8.99e-10	1.67e-08	2036	2133	1484	1556	1091	1243	1113	1246
745	ENSMUSG00000030283	St8sia1	protein_coding	1908.34	0.529604	0.0865404	6.11973	9.37e-10	1.74e-08	2833	2667	2075	2064	1713	1551	1105	1624
746	ENSMUSG00000028464	Tpm2	protein_coding	91.1858	-1.20091	0.196549	-6.11001	9.96e-10	1.85e-08	73	52	49	61	148	122	118	96
747	ENSMUSG00000034687	Fras1	protein_coding	777.243	0.8426	0.138061	6.10312	1.04e-09	1.93e-08	1379	1104	864	938	517	628	334	661
748	ENSMUSG00000036086	Zranb3	protein_coding	449.213	-0.543486	0.0892084	-6.09232	1.11e-09	2.06e-08	437	416	356	346	535	556	433	511
749	ENSMUSG00000027215	Cd82	protein_coding	136.089	-1.07988	0.17734	-6.08932	1.13e-09	2.09e-08	84	83	87	111	176	190	159	178
750	ENSMUSG00000021221	Dpf3	protein_coding	687.544	0.620697	0.102057	6.08189	1.19e-09	2.19e-08	1027	992	770	770	580	532	369	599
751	ENSMUSG00000050132	Sarm1	protein_coding	778.221	0.427892	0.0703587	6.08158	1.19e-09	2.19e-08	1173	1023	797	829	664	598	610	660
752	ENSMUSG00000032555	Topbp1	protein_coding	3267.8	-0.402286	0.0662106	-6.07586	1.23e-09	2.27e-08	3178	3317	2721	2723	3642	3785	3071	3716
753	ENSMUSG00000031283	Chrdl1	protein_coding	162.802	-0.955279	0.157261	-6.0745	1.24e-09	2.29e-08	130	157	98	91	243	193	155	234
754	ENSMUSG00000022505	Emp2	protein_coding	42.3103	-1.64956	0.27178	-6.06948	1.28e-09	2.35e-08	22	19	25	20	56	54	67	66
755	ENSMUSG00000035351	Nup37	protein_coding	465.631	-0.509647	0.083987	-6.06816	1.29e-09	2.37e-08	449	475	352	362	549	516	494	527
756	ENSMUSG00000022070	Bora	protein_coding	618.495	-0.474926	0.0782849	-6.06664	1.31e-09	2.39e-08	659	564	504	479	751	708	599	690
757	ENSMUSG00000029570	Lfng	protein_coding	1067.21	-0.602762	0.0994467	-6.06116	1.35e-09	2.47e-08	909	1059	821	804	1160	1173	1328	1226
758	ENSMUSG00000026821	Ralgds	protein_coding	2824.22	0.374509	0.0618402	6.05608	1.39e-09	2.55e-08	3916	3766	2802	3124	2556	2221	2293	2306
759	ENSMUSG00000052911	Lamb2	protein_coding	940.349	-0.427602	0.070615	-6.0554	1.4e-09	2.55e-08	1044	860	745	772	1129	1055	921	1014
760	ENSMUSG00000004110	Cacna1e	protein_coding	155.778	1.05307	0.173951	6.05386	1.41e-09	2.57e-08	316	202	204	181	97	99	67	126
761	ENSMUSG00000027624	Epb41l1	protein_coding	1641.91	0.399136	0.0660458	6.04332	1.51e-09	2.75e-08	2561	2143	1560	1762	1387	1341	1262	1416
762	ENSMUSG00000020629	Adi1	protein_coding	405.437	-0.599592	0.0992384	-6.04193	1.52e-09	2.77e-08	365	380	296	328	540	436	429	459
763	ENSMUSG00000039356	Exosc2	protein_coding	699.332	-0.47095	0.0779642	-6.0406	1.54e-09	2.78e-08	668	691	558	572	827	748	744	777
764	ENSMUSG00000025478	Dpysl4	protein_coding	5787.12	0.413643	0.0684892	6.03954	1.55e-09	2.8e-08	8533	7587	5928	6224	4676	4526	4996	4671
765	ENSMUSG00000034818	Celf5	protein_coding	920.442	0.577636	0.0956728	6.03763	1.56e-09	2.83e-08	1643	1217	895	1006	692	698	710	714
766	ENSMUSG00000034773	BC030867	protein_coding	169.034	-0.835771	0.1385	-6.03445	1.6e-09	2.88e-08	129	165	115	108	202	209	204	210
767	ENSMUSG00000038872	Zfhx3	protein_coding	1203.4	0.564728	0.0936259	6.03175	1.62e-09	2.93e-08	1888	1640	1255	1367	863	1031	730	1093
768	ENSMUSG00000023940	Sgo1	protein_coding	733.495	-0.511731	0.0848562	-6.03057	1.63e-09	2.94e-08	702	719	622	528	892	775	738	888
769	ENSMUSG00000051323	Pcdh19	protein_coding	1381.9	0.618789	0.102608	6.03062	1.63e-09	2.94e-08	2065	1989	1539	1555	1168	1131	717	1171
770	ENSMUSG00000021670	Hmgcr	protein_coding	7793.91	0.361816	0.0601563	6.01459	1.8e-09	3.24e-08	11200	10065	7411	8797	6649	6167	6288	6905
771	ENSMUSG00000036752	Tubb4b	protein_coding	3240.9	-0.462582	0.0769098	-6.01461	1.8e-09	3.24e-08	2944	3373	2677	2560	3636	3517	3552	3598
772	ENSMUSG00000062312	Erbb2	protein_coding	460.818	-0.539835	0.0897814	-6.01277	1.82e-09	3.27e-08	442	431	354	370	595	505	446	541
773	ENSMUSG00000027204	Fbn1	protein_coding	232.323	-1.28254	0.213626	-6.00369	1.93e-09	3.45e-08	152	155	116	151	373	391	148	360
774	ENSMUSG00000028224	Nbn	protein_coding	542.67	-0.475481	0.0793229	-5.99424	2.04e-09	3.65e-08	536	524	435	436	653	587	538	632
775	ENSMUSG00000040035	Disp2	protein_coding	1136.61	0.428648	0.0715896	5.98758	2.13e-09	3.8e-08	1726	1533	1062	1276	949	913	845	994
776	ENSMUSG00000097451	Rian	processed_transcript	3800.13	0.606284	0.101271	5.98677	2.14e-09	3.82e-08	7037	5001	3560	4266	2620	2918	2874	3059
777	ENSMUSG00000031207	Msn	protein_coding	2241.14	-0.440639	0.0736264	-5.98479	2.17e-09	3.86e-08	2205	2244	1774	1859	2829	2441	2023	2587
778	ENSMUSG00000021796	Bmpr1a	protein_coding	2289.63	-0.408211	0.0682888	-5.97771	2.26e-09	4.02e-08	2275	2431	1798	1879	2656	2549	2078	2708
779	ENSMUSG00000020859	Spag9	protein_coding	7621.53	0.437824	0.0732641	5.97596	2.29e-09	4.06e-08	11341	10441	7801	8002	6296	6742	4874	6883
780	ENSMUSG00000023072	Cep89	protein_coding	662.956	-0.446984	0.0748997	-5.96777	2.41e-09	4.26e-08	667	631	520	566	741	725	689	760
781	ENSMUSG00000032501	Trib1	protein_coding	1210.65	-0.432486	0.0724717	-5.96766	2.41e-09	4.26e-08	1172	1268	934	1010	1315	1331	1299	1352
782	ENSMUSG00000035864	Syt1	protein_coding	3737.92	0.360783	0.0604648	5.96682	2.42e-09	4.28e-08	5036	5349	3742	3850	3177	3084	2838	3399
783	ENSMUSG00000053436	Mapk14	protein_coding	1121.64	-0.387529	0.0649586	-5.96578	2.43e-09	4.3e-08	1186	1096	867	988	1273	1197	1144	1234
784	ENSMUSG00000031012	Cask	protein_coding	2340.39	0.345519	0.0579426	5.96313	2.47e-09	4.35e-08	3303	3031	2332	2523	2020	2014	1679	2169
785	ENSMUSG00000033278	Ptprm	protein_coding	539.608	0.45696	0.076629	5.96328	2.47e-09	4.35e-08	766	722	566	608	456	443	382	456
786	ENSMUSG00000078695	Cisd3	protein_coding	125.68	-1.00841	0.169109	-5.96306	2.48e-09	4.35e-08	88	84	78	101	167	141	162	168
787	ENSMUSG00000035245	Eogt	protein_coding	259.057	-0.70867	0.118856	-5.96242	2.49e-09	4.36e-08	229	209	201	194	303	314	254	357
788	ENSMUSG00000053693	Mast1	protein_coding	1328.19	0.537852	0.0902647	5.9586	2.54e-09	4.46e-08	2305	1760	1223	1503	1077	993	998	1065
789	ENSMUSG00000009734	Pou6f2	protein_coding	1331.13	0.497986	0.0836428	5.95372	2.62e-09	4.59e-08	2127	1852	1282	1449	1183	1090	838	1118
790	ENSMUSG00000053441	Adamts19	protein_coding	39.1906	-1.66427	0.279582	-5.95271	2.64e-09	4.61e-08	26	17	16	21	59	49	65	53
791	ENSMUSG00000028955	Vamp3	protein_coding	1023.13	-0.528159	0.0887657	-5.95003	2.68e-09	4.68e-08	914	973	864	792	1272	1201	1061	1074
792	ENSMUSG00000096210	H1f0	protein_coding	10027.4	-0.38431	0.0645906	-5.94993	2.68e-09	4.68e-08	9736	10490	8267	8421	11295	10213	10464	11320
793	ENSMUSG00000060636	Rpl35a	protein_coding	2052.32	-0.369479	0.062178	-5.94228	2.81e-09	4.9e-08	2160	2032	1698	1726	2104	2277	2068	2372
794	ENSMUSG00000022577	Ly6h	protein_coding	725.782	0.806601	0.135783	5.94037	2.84e-09	4.95e-08	1295	1045	759	874	480	442	636	439
795	ENSMUSG00000025577	Cbx2	protein_coding	1462.86	-0.404642	0.068192	-5.93386	2.96e-09	5.14e-08	1507	1427	1191	1227	1794	1481	1468	1619
796	ENSMUSG00000021301	Hecw1	protein_coding	1344.98	0.531962	0.0898724	5.91909	3.24e-09	5.61e-08	2044	1947	1368	1465	1032	1126	815	1241
797	ENSMUSG00000037003	Tns2	protein_coding	108.023	-1.00907	0.170498	-5.91836	3.25e-09	5.63e-08	91	72	66	76	169	143	112	128
798	ENSMUSG00000025867	Cplx2	protein_coding	5286.85	0.363045	0.0613744	5.91525	3.31e-09	5.73e-08	6667	7040	5672	5839	4478	4465	4116	4582
799	ENSMUSG00000024534	Sncaip	protein_coding	236.292	0.659877	0.111564	5.91477	3.32e-09	5.74e-08	348	343	271	271	166	167	171	194
800	ENSMUSG00000036295	Lrrn3	protein_coding	1165.83	0.748119	0.126526	5.91275	3.36e-09	5.81e-08	1470	1950	1345	1431	743	699	859	1011
801	ENSMUSG00000001521	Tulp3	protein_coding	691.788	-0.521106	0.0881566	-5.91114	3.4e-09	5.86e-08	822	631	476	518	806	840	700	769
802	ENSMUSG00000040711	Sh3pxd2b	protein_coding	2812.45	0.395978	0.066991	5.91092	3.4e-09	5.86e-08	4067	3689	2753	3153	2649	2328	1939	2379
803	ENSMUSG00000032113	Chek1	protein_coding	626.842	-0.599461	0.101421	-5.91062	3.41e-09	5.86e-08	560	635	488	440	819	710	567	798
804	ENSMUSG00000051079	Rgs13	protein_coding	50.3886	1.49807	0.253569	5.90792	3.46e-09	5.95e-08	114	91	51	68	22	28	22	29
805	ENSMUSG00000039936	Pik3cd	protein_coding	799.277	0.439032	0.0743653	5.90372	3.55e-09	6.09e-08	1181	1033	804	911	724	618	605	643
806	ENSMUSG00000052920	Prkg1	protein_coding	187.873	-1.21166	0.205331	-5.90104	3.61e-09	6.19e-08	104	143	127	103	277	281	140	313
807	ENSMUSG00000022263	Trio	protein_coding	3755.41	0.427957	0.072526	5.90073	3.62e-09	6.19e-08	5352	5154	3759	4152	3128	3324	2434	3376
808	ENSMUSG00000025612	Bach1	protein_coding	1840.11	0.435543	0.0738658	5.8964	3.72e-09	6.35e-08	2544	2586	1904	1999	1588	1494	1205	1704
809	ENSMUSG00000095956	1700036A12Rik	lincRNA	45.9362	1.51643	0.257266	5.89439	3.76e-09	6.42e-08	70	84	69	65	26	21	16	28
810	ENSMUSG00000021288	Klc1	protein_coding	11673.5	0.371401	0.0630225	5.89314	3.79e-09	6.46e-08	16715	15068	11705	12749	9718	9236	10044	9726
811	ENSMUSG00000025255	Zfhx4	protein_coding	1837.51	0.556752	0.0945077	5.89108	3.84e-09	6.52e-08	2956	2379	1971	2060	1512	1522	1036	1637
812	ENSMUSG00000034891	Sncb	protein_coding	181.429	1.04224	0.176913	5.89126	3.83e-09	6.52e-08	283	321	189	251	88	99	143	119
813	ENSMUSG00000021811	Dnajc9	protein_coding	1919	-0.42886	0.0728221	-5.88915	3.88e-09	6.59e-08	1812	2119	1522	1513	2186	2139	1917	2163
814	ENSMUSG00000024907	Gal	protein_coding	403.676	-0.742396	0.126074	-5.88856	3.9e-09	6.61e-08	318	350	291	316	514	533	481	393
815	ENSMUSG00000031548	Sfrp1	protein_coding	1699.43	0.608109	0.10338	5.88228	4.05e-09	6.86e-08	2191	2398	2067	2010	1550	1233	985	1396
816	ENSMUSG00000045493	Bhlhe23	protein_coding	53.9384	1.45449	0.247484	5.87711	4.17e-09	7.06e-08	81	85	75	91	32	21	23	34
817	ENSMUSG00000045763	Basp1	protein_coding	9412.78	0.428362	0.0729097	5.87524	4.22e-09	7.14e-08	12691	12970	9711	10608	7528	7128	8052	7809
818	ENSMUSG00000024347	Psd2	protein_coding	681.059	0.459887	0.0782927	5.87394	4.26e-09	7.18e-08	1052	923	711	697	531	539	542	574
819	ENSMUSG00000054808	Actn4	protein_coding	2256.01	-0.327428	0.0557443	-5.87374	4.26e-09	7.18e-08	2464	2290	1889	1884	2643	2418	2087	2448
820	ENSMUSG00000041238	Rbbp8	protein_coding	778.991	-0.463878	0.0789881	-5.87276	4.29e-09	7.22e-08	725	789	612	653	912	892	767	876
821	ENSMUSG00000037685	Atp8a1	protein_coding	894.759	0.484508	0.0825512	5.86918	4.38e-09	7.37e-08	1460	1169	898	960	731	733	592	799
822	ENSMUSG00000018474	Chd3	protein_coding	4102.95	0.279552	0.0476977	5.86091	4.6e-09	7.72e-08	5787	5203	4071	4183	3631	3660	3103	3769
823	ENSMUSG00000020821	Kif1c	protein_coding	861.406	-0.516777	0.0881853	-5.86013	4.63e-09	7.75e-08	770	868	695	673	1081	979	801	1018
824	ENSMUSG00000027583	Zbtb46	protein_coding	634.635	0.458933	0.0783449	5.85785	4.69e-09	7.84e-08	975	881	643	656	497	540	470	534
825	ENSMUSG00000058297	Spock2	protein_coding	3245.95	0.32744	0.0558968	5.85795	4.69e-09	7.84e-08	4398	4297	3304	3411	2847	2598	2709	2817
826	ENSMUSG00000057182	Scn3a	protein_coding	1208.93	0.646119	0.110381	5.85356	4.81e-09	8.03e-08	2264	1538	1281	1289	923	969	688	1034
827	ENSMUSG00000015709	Arnt2	protein_coding	3174.55	0.303261	0.0518294	5.85113	4.88e-09	8.14e-08	4263	4166	3164	3367	2807	2798	2364	2891
828	ENSMUSG00000037815	Ctnna1	protein_coding	3769.27	-0.355559	0.0608087	-5.84718	5e-09	8.33e-08	3884	3918	3067	3201	4537	3965	3487	4191
829	ENSMUSG00000028792	Ak2	protein_coding	1404.84	-0.361864	0.061896	-5.84632	5.03e-09	8.36e-08	1439	1425	1164	1197	1562	1471	1385	1611
830	ENSMUSG00000039187	Fanci	protein_coding	297.889	-0.604768	0.103452	-5.84588	5.04e-09	8.37e-08	313	282	211	208	331	372	299	372
831	ENSMUSG00000049281	Scn3b	protein_coding	1581.78	0.363435	0.0622032	5.84271	5.14e-09	8.52e-08	2207	2207	1561	1645	1325	1288	1275	1388
832	ENSMUSG00000032826	Ank2	protein_coding	12732.2	0.483238	0.0827137	5.8423	5.15e-09	8.53e-08	20111	16844	12603	14155	10767	11066	7711	11168
833	ENSMUSG00000024795	Kif20b	protein_coding	1034.22	-0.522884	0.089547	-5.83921	5.24e-09	8.68e-08	1017	1031	857	715	1232	1252	924	1262
834	ENSMUSG00000041552	Ptchd1	protein_coding	68.5791	-1.3744	0.235387	-5.83888	5.26e-09	8.69e-08	39	35	48	38	99	103	64	113
835	ENSMUSG00000053626	Tll1	protein_coding	211.619	-0.813791	0.139409	-5.83743	5.3e-09	8.76e-08	150	202	150	148	247	261	222	300
836	ENSMUSG00000035246	Pcyt1b	protein_coding	1231.48	0.437538	0.0749684	5.83631	5.34e-09	8.8e-08	1626	1807	1215	1396	1015	1026	918	1033
837	ENSMUSG00000034684	Sema3f	protein_coding	952.566	-0.491314	0.0843306	-5.82605	5.68e-09	9.34e-08	1126	867	712	698	1156	1073	1027	989
838	ENSMUSG00000041037	Irgq	protein_coding	2278.95	0.356063	0.0611335	5.82434	5.73e-09	9.41e-08	2987	3090	2365	2451	1989	1950	1641	2061
839	ENSMUSG00000041133	Smc1a	protein_coding	4814.91	-0.338085	0.058046	-5.82442	5.73e-09	9.41e-08	4900	5131	4027	4028	5372	5073	4534	5564
840	ENSMUSG00000045136	Tubb2b	protein_coding	22515.9	0.445661	0.076547	5.82205	5.81e-09	9.53e-08	31134	31472	23096	25068	16800	17248	19238	19181
841	ENSMUSG00000022860	Chodl	protein_coding	162.633	-0.84346	0.144917	-5.8203	5.87e-09	9.62e-08	128	151	88	129	201	207	190	198
842	ENSMUSG00000106847	Peg13	sense_intronic	3204.45	0.361517	0.0621221	5.81946	5.9e-09	9.66e-08	4137	4452	3283	3470	2642	2692	2511	2853
843	ENSMUSG00000022177	Haus4	protein_coding	355.542	-0.543932	0.0936317	-5.80927	6.27e-09	1.03e-07	367	325	268	274	428	406	393	380
844	ENSMUSG00000040146	Rgl3	protein_coding	262.532	-0.663256	0.114272	-5.80419	6.47e-09	1.06e-07	285	220	172	195	359	295	272	305
845	ENSMUSG00000022055	Nefl	protein_coding	7120.35	0.438216	0.0755061	5.80372	6.49e-09	1.06e-07	11427	9144	6942	7705	6422	5140	5617	5885
846	ENSMUSG00000020121	Srgap1	protein_coding	1864.34	0.40842	0.0703863	5.80255	6.53e-09	1.06e-07	2779	2399	1888	2031	1605	1618	1231	1680
847	ENSMUSG00000046324	Ermp1	protein_coding	717.391	-0.481827	0.083046	-5.80192	6.56e-09	1.07e-07	679	702	589	571	831	817	668	880
848	ENSMUSG00000060257	Scrt2	protein_coding	2512.84	0.460287	0.079392	5.79764	6.73e-09	1.09e-07	3401	3557	2571	2869	1992	1844	2125	2084
849	ENSMUSG00000068740	Celsr2	protein_coding	4850.28	0.348716	0.0601797	5.79457	6.85e-09	1.11e-07	7452	6006	4693	5159	4274	4176	3552	4307
850	ENSMUSG00000098051	Gm27032	lincRNA	114.398	1.16366	0.200905	5.79207	6.95e-09	1.13e-07	229	151	118	179	52	67	78	71
851	ENSMUSG00000026556	Vangl2	protein_coding	2271.46	0.295345	0.0509998	5.79111	6.99e-09	1.13e-07	3129	2900	2254	2402	2078	1872	1801	2035
852	ENSMUSG00000051674	Dcun1d4	protein_coding	1212.51	0.393087	0.0678815	5.79079	7.01e-09	1.13e-07	1665	1669	1279	1262	1015	930	963	1090
853	ENSMUSG00000031353	Rbbp7	protein_coding	3296.58	-0.399222	0.0689551	-5.7896	7.06e-09	1.14e-07	3126	3474	2781	2678	3728	3509	3405	3655
854	ENSMUSG00000017009	Sdc4	protein_coding	136.305	-0.974206	0.168462	-5.78294	7.34e-09	1.18e-07	83	125	81	100	193	180	145	172
855	ENSMUSG00000055044	Pdlim1	protein_coding	171.151	-0.794767	0.137555	-5.77781	7.57e-09	1.22e-07	139	149	130	113	231	216	196	184
856	ENSMUSG00000028010	Gar1	protein_coding	634.927	-0.591361	0.102391	-5.77549	7.67e-09	1.23e-07	549	625	490	485	673	734	637	871
857	ENSMUSG00000026825	Dnm1	protein_coding	838.019	0.482542	0.0835659	5.77438	7.72e-09	1.24e-07	1357	1159	829	863	636	666	664	699
858	ENSMUSG00000033342	Plppr5	protein_coding	205.083	-0.791118	0.137133	-5.76897	7.98e-09	1.28e-07	151	210	146	132	272	242	227	251
859	ENSMUSG00000086155	9430041J12Rik	antisense	38.6996	1.60705	0.278609	5.76811	8.02e-09	1.28e-07	84	65	45	57	16	23	18	16
860	ENSMUSG00000040729	Cep126	protein_coding	553.917	-0.649193	0.112571	-5.76698	8.07e-09	1.29e-07	596	492	422	343	669	720	486	719
861	ENSMUSG00000026544	Dusp23	protein_coding	95.3741	-0.98089	0.170109	-5.76623	8.11e-09	1.3e-07	75	84	59	56	126	113	125	118
862	ENSMUSG00000019988	Nedd1	protein_coding	748.732	-0.490923	0.0851861	-5.76295	8.27e-09	1.32e-07	724	783	583	566	932	863	679	875
863	ENSMUSG00000023050	Map3k12	protein_coding	989.202	0.526894	0.0914407	5.76214	8.31e-09	1.32e-07	1754	1263	999	1026	791	822	707	775
864	ENSMUSG00000024892	Pcx	protein_coding	463.344	-0.524535	0.0911464	-5.75487	8.67e-09	1.38e-07	441	497	333	353	548	502	501	534
865	ENSMUSG00000019773	Fbxo5	protein_coding	812.086	-0.572132	0.0994305	-5.7541	8.71e-09	1.39e-07	667	786	669	634	1037	911	870	884
866	ENSMUSG00000041736	Tspo	protein_coding	61.0271	-1.35039	0.234693	-5.75389	8.72e-09	1.39e-07	31	50	33	32	104	68	75	88
867	ENSMUSG00000030203	Dusp16	protein_coding	1007.05	-0.51428	0.0894118	-5.75182	8.83e-09	1.4e-07	894	1003	817	799	1127	1112	977	1311
868	ENSMUSG00000028089	Chd1l	protein_coding	288.937	-0.586754	0.102039	-5.75027	8.91e-09	1.41e-07	280	262	228	213	368	314	310	331
869	ENSMUSG00000026469	Xpr1	protein_coding	4690.21	0.380061	0.066097	5.75005	8.92e-09	1.41e-07	6794	6542	4688	4737	3980	3662	3463	4474
870	ENSMUSG00000057335	Cep170	protein_coding	5885	0.488838	0.0851097	5.74362	9.27e-09	1.47e-07	9148	7922	5935	6472	4810	5035	3530	5404
871	ENSMUSG00000042428	Mgat3	protein_coding	1261.87	0.382902	0.0666944	5.74113	9.4e-09	1.48e-07	1707	1748	1293	1347	1027	1047	946	1162
872	ENSMUSG00000042079	Hnrnpf	protein_coding	3633.5	-0.357854	0.0623663	-5.73793	9.58e-09	1.51e-07	3609	3907	3053	2971	4104	3758	3608	4108
873	ENSMUSG00000036099	Vezt	protein_coding	1412.14	0.369649	0.0644558	5.73493	9.76e-09	1.54e-07	2147	1840	1426	1420	1165	1178	1081	1281
874	ENSMUSG00000033581	Igf2bp2	protein_coding	2088.3	-0.491129	0.0856573	-5.73364	9.83e-09	1.55e-07	2043	1962	1717	1646	2790	2150	1910	2498
875	ENSMUSG00000022283	Pabpc1	protein_coding	6486.37	-0.337222	0.0588925	-5.72607	1.03e-08	1.62e-07	6765	6941	5174	5543	7774	6698	6094	7112
876	ENSMUSG00000048330	Ric3	protein_coding	728.653	0.423852	0.0741664	5.71487	1.1e-08	1.72e-07	1127	927	732	791	612	627	534	604
877	ENSMUSG00000074415	3110039I08Rik	processed_transcript	429.08	1.0123	0.177215	5.71223	1.12e-08	1.75e-07	1070	479	448	507	246	282	267	289
878	ENSMUSG00000072980	Oip5	protein_coding	252.522	-0.625742	0.109632	-5.70768	1.15e-08	1.79e-07	249	241	187	172	299	288	297	283
879	ENSMUSG00000019303	Psmc3ip	protein_coding	296.875	-0.575878	0.101008	-5.70128	1.19e-08	1.86e-07	272	283	229	229	353	352	318	331
880	ENSMUSG00000036667	Tcaf1	protein_coding	7439.62	0.337172	0.0591404	5.70121	1.19e-08	1.86e-07	10700	9718	7283	7854	6489	6509	5220	6937
881	ENSMUSG00000031016	Wee1	protein_coding	457.648	-0.546788	0.0959342	-5.69961	1.2e-08	1.87e-07	416	452	332	381	588	505	443	541
882	ENSMUSG00000047632	Fgfbp3	protein_coding	413.622	0.689073	0.120925	5.69835	1.21e-08	1.88e-07	588	565	486	522	264	263	319	358
883	ENSMUSG00000029016	Clcn6	protein_coding	2329.34	0.483005	0.0847859	5.69676	1.22e-08	1.9e-07	4030	2964	2289	2437	1857	1974	1778	1797
884	ENSMUSG00000026797	Stxbp1	protein_coding	6180.36	0.297275	0.0522128	5.69352	1.24e-08	1.93e-07	8388	8125	5912	6679	5468	5261	5099	5312
885	ENSMUSG00000021965	Ska3	protein_coding	426.008	-0.4943	0.0868877	-5.68895	1.28e-08	1.98e-07	418	412	338	337	522	453	439	487
886	ENSMUSG00000028597	Gpx7	protein_coding	137.962	-0.838389	0.147405	-5.68766	1.29e-08	2e-07	110	119	94	97	161	162	180	169
887	ENSMUSG00000027353	Mcm8	protein_coding	391.613	-0.51911	0.0912999	-5.68577	1.3e-08	2.02e-07	388	388	321	276	463	449	397	452
888	ENSMUSG00000030978	Rrm1	protein_coding	4681.94	-0.332134	0.0584778	-5.67966	1.35e-08	2.09e-07	4700	5014	3859	4039	5216	4943	4516	5249
889	ENSMUSG00000040084	Bub1b	protein_coding	2214.74	-0.38055	0.0670071	-5.67925	1.35e-08	2.09e-07	2186	2237	1908	1828	2498	2436	2074	2564
890	ENSMUSG00000024302	Dtna	protein_coding	397.553	0.557011	0.0981023	5.67786	1.36e-08	2.11e-07	563	549	420	483	345	300	249	337
891	ENSMUSG00000033088	Triobp	protein_coding	2087.01	0.383601	0.0675904	5.67537	1.38e-08	2.13e-07	3071	2686	2045	2305	1766	1916	1576	1652
892	ENSMUSG00000063659	Zbtb18	protein_coding	3691.91	0.277493	0.0489238	5.67195	1.41e-08	2.17e-07	5246	4848	3615	3638	3305	3248	2867	3329
893	ENSMUSG00000022454	Nell2	protein_coding	4172.26	0.373648	0.0658805	5.6716	1.41e-08	2.17e-07	5694	5739	4116	4560	3339	3411	3519	3565
894	ENSMUSG00000023456	Tpi1	protein_coding	8718.94	0.412837	0.0728099	5.67007	1.43e-08	2.19e-07	11714	11942	9192	9541	7258	6780	7550	6846
895	ENSMUSG00000028995	Fam126a	protein_coding	1744.42	0.4485	0.0791209	5.66853	1.44e-08	2.21e-07	2502	2310	1873	1901	1400	1360	1176	1710
896	ENSMUSG00000051790	Nlgn2	protein_coding	3892.94	0.443067	0.0781749	5.66763	1.45e-08	2.22e-07	6550	4778	3909	4072	3220	3166	3107	3077
897	ENSMUSG00000004591	Pkn2	protein_coding	1643.4	-0.444902	0.0785018	-5.66741	1.45e-08	2.22e-07	1803	1632	1246	1281	2028	1858	1405	1973
898	ENSMUSG00000015291	Gdi1	protein_coding	8344.46	0.348497	0.061555	5.66156	1.5e-08	2.29e-07	12633	10752	8079	8667	7064	6971	7023	6893
899	ENSMUSG00000023345	Poc1a	protein_coding	197.836	-0.749635	0.132423	-5.66091	1.51e-08	2.3e-07	163	181	128	155	270	231	231	213
900	ENSMUSG00000074480	Mex3a	protein_coding	7354.64	0.341184	0.0602764	5.66031	1.51e-08	2.3e-07	9481	9861	7630	7975	6342	6326	5332	6806
901	ENSMUSG00000022489	Pde1b	protein_coding	2522.61	0.389171	0.0687771	5.65843	1.53e-08	2.33e-07	3530	3441	2527	2725	2056	1967	2163	2125
902	ENSMUSG00000027160	Ccdc34	protein_coding	890.661	-0.433408	0.0766487	-5.65447	1.56e-08	2.38e-07	925	892	727	687	1025	876	961	1039
903	ENSMUSG00000042066	Tmcc2	protein_coding	1560.81	0.376023	0.0665234	5.65249	1.58e-08	2.4e-07	2029	2121	1615	1731	1340	1271	1265	1300
904	ENSMUSG00000046949	Nqo2	protein_coding	347.756	-0.570602	0.100973	-5.65102	1.6e-08	2.42e-07	318	349	260	265	456	394	347	391
905	ENSMUSG00000027009	Itga4	protein_coding	399.45	0.797462	0.141137	5.65027	1.6e-08	2.43e-07	684	506	452	521	300	329	178	314
906	ENSMUSG00000017861	Mybl2	protein_coding	607.062	-0.491701	0.0870394	-5.64918	1.61e-08	2.44e-07	581	559	486	512	761	634	630	681
907	ENSMUSG00000040978	Gm11992	protein_coding	73.0102	-1.2205	0.216229	-5.64446	1.66e-08	2.5e-07	38	57	43	47	114	105	72	100
908	ENSMUSG00000019823	Mical1	protein_coding	873.631	-0.42584	0.0754592	-5.64331	1.67e-08	2.52e-07	992	798	662	733	973	1006	911	928
909	ENSMUSG00000072640	Lyrm9	protein_coding	510.15	0.45192	0.080084	5.64307	1.67e-08	2.52e-07	734	692	558	533	441	410	354	442
910	ENSMUSG00000039081	Zfp503	protein_coding	360.651	0.523627	0.0928359	5.64035	1.7e-08	2.56e-07	512	485	405	407	299	274	278	276
911	ENSMUSG00000033454	Zbtb1	protein_coding	449.128	-0.495918	0.0880937	-5.62944	1.81e-08	2.72e-07	458	444	354	335	509	556	438	504
912	ENSMUSG00000075318	Scn2a	protein_coding	462.876	0.484594	0.0860907	5.62888	1.81e-08	2.73e-07	685	677	482	472	370	384	334	386
913	ENSMUSG00000031442	Mcf2l	protein_coding	2359.94	0.342972	0.0609626	5.62594	1.85e-08	2.77e-07	3645	2959	2337	2392	2010	2033	1816	2085
914	ENSMUSG00000034290	Nek9	protein_coding	1824.5	-0.389933	0.0693304	-5.62427	1.86e-08	2.79e-07	2034	1778	1510	1424	2215	2049	1625	2032
915	ENSMUSG00000030310	Slc6a1	protein_coding	1638.17	0.669156	0.118982	5.62402	1.87e-08	2.8e-07	2564	2432	1891	1727	964	1259	1415	1150
916	ENSMUSG00000028360	Slc44a5	protein_coding	241.038	0.706442	0.125649	5.62232	1.88e-08	2.82e-07	386	362	250	285	193	179	126	205
917	ENSMUSG00000027203	Dut	protein_coding	1869.53	-0.458404	0.0815746	-5.61944	1.92e-08	2.86e-07	1714	1852	1549	1547	2095	1923	2088	2131
918	ENSMUSG00000075478	Slitrk1	protein_coding	129.932	0.916753	0.163393	5.61073	2.01e-08	3.01e-07	229	211	136	156	70	87	78	109
919	ENSMUSG00000034799	Unc13a	protein_coding	1746.93	0.63884	0.113886	5.60945	2.03e-08	3.03e-07	3499	2136	1699	1902	1362	1381	1190	1283
920	ENSMUSG00000055235	Wdr86	protein_coding	119.325	-1.38805	0.247558	-5.60694	2.06e-08	3.07e-07	59	84	60	75	234	175	82	176
921	ENSMUSG00000039086	Ss18l1	protein_coding	1094.69	0.382601	0.0682509	5.60579	2.07e-08	3.08e-07	1608	1441	1050	1206	906	877	862	981
922	ENSMUSG00000031902	Nfatc3	protein_coding	1211.68	-0.571837	0.102066	-5.60264	2.11e-08	3.14e-07	1043	1164	997	918	1602	1472	1058	1420
923	ENSMUSG00000015143	Actn1	protein_coding	636.686	-0.515625	0.0920363	-5.60241	2.11e-08	3.14e-07	676	618	453	498	841	755	573	701
924	ENSMUSG00000028691	Prdx1	protein_coding	2853.86	-0.416951	0.0744525	-5.60023	2.14e-08	3.17e-07	2671	2987	2414	2290	3258	2945	3023	3212
925	ENSMUSG00000025289	Prdx4	protein_coding	1111.12	-0.466796	0.0833853	-5.59807	2.17e-08	3.21e-07	1013	1140	936	865	1318	1172	1193	1230
926	ENSMUSG00000029177	Cenpa	protein_coding	1418.32	-0.369321	0.0659873	-5.59684	2.18e-08	3.23e-07	1661	1399	1078	1166	1597	1515	1495	1487
927	ENSMUSG00000033032	Afap1l1	protein_coding	156.051	-0.742492	0.132824	-5.59004	2.27e-08	3.35e-07	132	131	119	113	199	191	164	191
928	ENSMUSG00000030806	Stx1b	protein_coding	1280	0.390721	0.0699206	5.58807	2.3e-08	3.39e-07	1737	1764	1317	1376	1040	992	1034	1156
929	ENSMUSG00000019139	Isyna1	protein_coding	638.73	-0.58454	0.104616	-5.58746	2.3e-08	3.4e-07	651	614	482	441	917	721	646	646
930	ENSMUSG00000006575	Rundc3a	protein_coding	1988.45	0.534666	0.0957119	5.5862	2.32e-08	3.42e-07	3315	2630	1995	2180	1503	1475	1728	1459
931	ENSMUSG00000026740	Dnajc1	protein_coding	626.731	0.508771	0.091089	5.58543	2.33e-08	3.43e-07	1047	803	642	673	539	518	403	521
932	ENSMUSG00000026626	Ppp2r5a	protein_coding	494.496	-0.47487	0.0850321	-5.58459	2.34e-08	3.44e-07	503	469	392	398	578	528	474	618
933	ENSMUSG00000038780	Smurf1	protein_coding	1254.6	0.353033	0.0632507	5.58149	2.38e-08	3.5e-07	1722	1728	1211	1356	1068	1057	976	1104
934	ENSMUSG00000025789	St8sia2	protein_coding	3213.5	0.306566	0.0549379	5.58022	2.4e-08	3.52e-07	4369	4378	3061	3395	2834	2812	2448	2881
935	ENSMUSG00000024268	Celf4	protein_coding	1906.2	0.390672	0.0700531	5.57679	2.45e-08	3.59e-07	2694	2664	1894	2007	1452	1599	1532	1703
936	ENSMUSG00000044576	Garem2	protein_coding	486.409	0.485007	0.0869991	5.57485	2.48e-08	3.63e-07	735	659	504	530	426	351	384	385
937	ENSMUSG00000041530	Ago1	protein_coding	6927.25	0.384837	0.0690413	5.57401	2.49e-08	3.64e-07	10239	8694	7177	7412	6264	6198	4568	5981
938	ENSMUSG00000019998	Stx7	protein_coding	2070.98	0.358067	0.064248	5.5732	2.5e-08	3.65e-07	2872	2886	1995	2206	1800	1663	1710	1745
939	ENSMUSG00000030774	Pak1	protein_coding	2154.29	0.374606	0.0672675	5.5689	2.56e-08	3.74e-07	3130	2999	2129	2181	1797	1668	1773	1913
940	ENSMUSG00000054115	Skp2	protein_coding	1500.46	-0.357823	0.0642573	-5.5686	2.57e-08	3.74e-07	1608	1546	1230	1226	1794	1531	1398	1722
941	ENSMUSG00000048450	Msx1	protein_coding	44.679	-5.28836	0.949792	-5.56791	2.58e-08	3.75e-07	1	1	4	3	153	117	11	59
942	ENSMUSG00000002059	Rab34	protein_coding	444.837	-0.626193	0.112517	-5.56534	2.62e-08	3.81e-07	490	349	298	359	609	517	467	469
943	ENSMUSG00000027968	Larp7	protein_coding	1152.63	-0.377069	0.067784	-5.5628	2.65e-08	3.86e-07	1181	1246	916	935	1258	1196	1183	1330
944	ENSMUSG00000024304	Cdh2	protein_coding	7213.13	-0.28815	0.0518023	-5.56249	2.66e-08	3.86e-07	7681	7739	5898	6337	7729	7565	6787	8209
945	ENSMUSG00000021585	Cast	protein_coding	148.928	-0.824421	0.148239	-5.56142	2.68e-08	3.88e-07	123	139	101	96	196	209	139	185
946	ENSMUSG00000045273	Cenph	protein_coding	285.37	-0.632627	0.113761	-5.561	2.68e-08	3.89e-07	288	227	204	233	320	374	288	342
947	ENSMUSG00000018339	Gpx3	protein_coding	183.293	-0.745438	0.134117	-5.55812	2.73e-08	3.95e-07	179	143	138	124	257	202	180	240
948	ENSMUSG00000003746	Man1a	protein_coding	115.141	-1.15594	0.208392	-5.54694	2.91e-08	4.2e-07	81	95	69	60	208	144	91	170
949	ENSMUSG00000021062	Rab15	protein_coding	987.083	-0.387676	0.0699333	-5.54351	2.96e-08	4.28e-07	1008	987	791	850	1183	1026	981	1080
950	ENSMUSG00000004099	Dnmt1	protein_coding	4974.99	-0.293476	0.0529467	-5.54285	2.98e-08	4.29e-07	5277	5124	4242	4349	5588	5326	4608	5410
951	ENSMUSG00000033633	Clec18a	protein_coding	82.0128	-1.26014	0.227407	-5.54135	3e-08	4.33e-07	76	59	41	34	130	142	76	97
952	ENSMUSG00000025795	Rassf3	protein_coding	177.863	-0.954154	0.17224	-5.53967	3.03e-08	4.36e-07	110	147	129	123	265	218	158	259
953	ENSMUSG00000031875	Cmtm3	protein_coding	262.242	-0.601793	0.108669	-5.53788	3.06e-08	4.4e-07	254	236	190	207	336	305	287	277
954	ENSMUSG00000025810	Nrp1	protein_coding	1015.78	0.423866	0.0765803	5.53492	3.11e-08	4.47e-07	1339	1419	1031	1165	822	864	721	907
955	ENSMUSG00000020589	Fam49a	protein_coding	792.482	0.417941	0.0755681	5.53066	3.19e-08	4.58e-07	1175	1065	846	795	631	712	593	653
956	ENSMUSG00000030126	Tmcc1	protein_coding	1716.22	0.298823	0.0541664	5.51675	3.45e-08	4.95e-07	2329	2268	1707	1782	1485	1466	1355	1568
957	ENSMUSG00000051331	Cacna1c	protein_coding	355.848	0.657523	0.119202	5.51602	3.47e-08	4.97e-07	609	488	377	399	267	255	203	334
958	ENSMUSG00000039835	Nhsl1	protein_coding	1545.24	0.400678	0.0726578	5.5146	3.5e-08	5e-07	2243	2017	1538	1718	1442	1285	1027	1347
959	ENSMUSG00000021569	Trip13	protein_coding	517.832	-0.451654	0.0819248	-5.51303	3.53e-08	5.04e-07	513	530	408	413	618	584	491	593
960	ENSMUSG00000022353	Mtss1	protein_coding	2178.88	0.321308	0.0582844	5.51277	3.53e-08	5.04e-07	3043	2921	2083	2313	1830	1869	1686	2011
961	ENSMUSG00000026434	Nucks1	protein_coding	3799.82	-0.317856	0.0576936	-5.50937	3.6e-08	5.14e-07	3939	3971	3198	3267	4165	3836	3735	4356
962	ENSMUSG00000063455	D630045J12Rik	protein_coding	2331.57	0.398803	0.0724334	5.50579	3.68e-08	5.24e-07	3351	3044	2447	2481	1946	2042	1533	2180
963	ENSMUSG00000028868	Wasf2	protein_coding	726.899	-0.521259	0.0947206	-5.50312	3.73e-08	5.31e-07	708	680	593	556	986	825	654	816
964	ENSMUSG00000032394	Igdcc3	protein_coding	316.594	0.674359	0.122604	5.50031	3.79e-08	5.39e-07	574	426	340	339	275	206	193	261
965	ENSMUSG00000034317	Trim59	protein_coding	1772.26	-0.356402	0.0648008	-5.49995	3.8e-08	5.4e-07	1891	1937	1471	1347	2002	1984	1673	1944
966	ENSMUSG00000039911	Spsb1	protein_coding	208.82	-0.748363	0.136093	-5.4989	3.82e-08	5.42e-07	172	186	156	147	230	304	218	246
967	ENSMUSG00000027854	Sike1	protein_coding	2561.38	0.306282	0.0557023	5.49856	3.83e-08	5.43e-07	3562	3414	2536	2609	2402	2194	1882	2281
968	ENSMUSG00000021871	Gm49342	protein_coding	520.074	-0.666319	0.121284	-5.49387	3.93e-08	5.57e-07	500	444	371	397	770	668	494	510
969	ENSMUSG00000030641	Ddias	protein_coding	295.643	-0.570894	0.103923	-5.49345	3.94e-08	5.58e-07	289	283	231	212	379	313	294	365
970	ENSMUSG00000009291	Pttg1ip	protein_coding	769.487	-0.389434	0.0708948	-5.49312	3.95e-08	5.58e-07	799	780	644	614	903	812	777	837
971	ENSMUSG00000036306	Lzts1	protein_coding	415.429	0.478391	0.0871095	5.49183	3.98e-08	5.62e-07	611	557	413	485	347	325	308	345
972	ENSMUSG00000063077	Kif1b	protein_coding	11936.3	0.421273	0.076712	5.49162	3.98e-08	5.62e-07	16306	16297	12363	13261	10126	10198	7577	11213
973	ENSMUSG00000028246	Faxc	protein_coding	2291.76	0.54753	0.0997153	5.49093	4e-08	5.63e-07	3196	3295	2500	2601	1922	1967	1249	2011
974	ENSMUSG00000036718	Micall2	protein_coding	219.36	0.67551	0.123045	5.48992	4.02e-08	5.66e-07	370	293	221	272	155	174	157	158
975	ENSMUSG00000033970	Rfc3	protein_coding	721.869	-0.399246	0.0727404	-5.48864	4.05e-08	5.69e-07	779	706	598	571	809	766	771	782
976	ENSMUSG00000078716	Tmem8b	protein_coding	849.829	0.38616	0.070357	5.48858	4.05e-08	5.69e-07	1294	1123	838	879	750	693	622	752
977	ENSMUSG00000063146	Clip2	protein_coding	2450.24	0.311046	0.0566872	5.48707	4.09e-08	5.73e-07	3506	3137	2389	2577	2111	1989	2033	2205
978	ENSMUSG00000031004	Mki67	protein_coding	10518.9	-0.512067	0.0933567	-5.48507	4.13e-08	5.79e-07	10255	9931	8346	8299	11596	13208	8772	13843
979	ENSMUSG00000025364	Pa2g4	protein_coding	4011.82	-0.323963	0.0590843	-5.48306	4.18e-08	5.85e-07	4076	4264	3449	3347	4482	4134	3994	4405
980	ENSMUSG00000078521	Aunip	protein_coding	131.166	-0.770325	0.140547	-5.48091	4.23e-08	5.92e-07	114	117	91	91	159	153	154	164
981	ENSMUSG00000032186	Tmod2	protein_coding	4055.03	0.468579	0.0855568	5.47682	4.33e-08	6.05e-07	5718	6042	4369	4034	3255	3374	2584	3819
982	ENSMUSG00000057706	Mex3b	protein_coding	1801.27	0.360225	0.0658214	5.47276	4.43e-08	6.19e-07	2728	2393	1676	1907	1523	1488	1386	1627
983	ENSMUSG00000032116	Stt3a	protein_coding	1622.68	-0.423407	0.0773839	-5.47152	4.46e-08	6.22e-07	1513	1726	1279	1368	1910	1809	1509	1880
984	ENSMUSG00000024862	Klc2	protein_coding	1438.24	0.348823	0.0637997	5.46748	4.56e-08	6.35e-07	2069	1901	1438	1488	1227	1181	1215	1196
985	ENSMUSG00000057738	Sptan1	protein_coding	11983.6	0.353259	0.0646104	5.46752	4.56e-08	6.35e-07	18704	14684	11724	12593	10059	10501	8735	10922
986	ENSMUSG00000005470	Asf1b	protein_coding	747.18	-0.535649	0.0979985	-5.46588	4.61e-08	6.4e-07	624	772	587	599	915	789	816	850
987	ENSMUSG00000074981	Dcdc5	transcribed_unitary_pseudogene	231.275	1.00258	0.183505	5.46352	4.67e-08	6.48e-07	548	280	248	268	143	166	108	174
988	ENSMUSG00000040339	Fam102b	protein_coding	1190.34	0.346259	0.0633843	5.46286	4.69e-08	6.5e-07	1597	1603	1245	1237	1040	1028	867	1070
989	ENSMUSG00000024513	Mbd2	protein_coding	728.65	-0.402856	0.0737947	-5.45915	4.78e-08	6.63e-07	773	754	569	584	826	766	788	781
990	ENSMUSG00000066438	Plekhd1	protein_coding	470.565	0.607176	0.111243	5.45812	4.81e-08	6.66e-07	816	673	457	508	352	317	383	368
991	ENSMUSG00000020728	Cep112	protein_coding	236.848	-0.626067	0.114718	-5.45746	4.83e-08	6.68e-07	225	225	177	168	269	279	232	319
992	ENSMUSG00000030060	Hmces	protein_coding	336.724	-0.539518	0.0988728	-5.45669	4.85e-08	6.7e-07	330	342	264	236	375	380	375	390
993	ENSMUSG00000022797	Tfrc	protein_coding	2146.85	0.500419	0.0917351	5.45504	4.9e-08	6.76e-07	3524	2911	2034	2370	1789	1885	1304	1837
994	ENSMUSG00000048782	Insc	protein_coding	146.893	0.754918	0.138392	5.45494	4.9e-08	6.76e-07	207	216	174	185	109	102	103	102
995	ENSMUSG00000026421	Csrp1	protein_coding	538.519	-0.778037	0.142651	-5.45411	4.92e-08	6.78e-07	397	424	444	396	663	520	732	666
996	ENSMUSG00000047261	Gap43	protein_coding	13766.4	0.414168	0.0760317	5.44731	5.11e-08	7.04e-07	18559	19044	14097	15315	10802	10544	12004	11510
997	ENSMUSG00000039137	Whrn	protein_coding	713.5	0.493723	0.0906519	5.44636	5.14e-08	7.07e-07	1219	907	725	743	626	556	529	552
998	ENSMUSG00000027639	Samhd1	protein_coding	771.007	-0.409533	0.0752034	-5.44568	5.16e-08	7.09e-07	790	796	605	633	952	824	726	861
999	ENSMUSG00000057113	Npm1	protein_coding	9901.12	-0.286527	0.0526159	-5.44564	5.16e-08	7.09e-07	10424	10823	8264	8473	10936	10068	9418	11133
1000	ENSMUSG00000024177	Nme4	protein_coding	302.159	-0.536028	0.0984918	-5.44236	5.26e-08	7.21e-07	317	293	224	222	384	327	307	349
1001	ENSMUSG00000004626	Stxbp2	protein_coding	428.18	-0.503075	0.0924604	-5.44098	5.3e-08	7.26e-07	482	384	325	325	466	518	457	473
1002	ENSMUSG00000056531	Ccdc18	protein_coding	181.301	-0.653281	0.120076	-5.44056	5.31e-08	7.27e-07	186	165	119	134	222	213	192	220
1003	ENSMUSG00000041789	2700046A07Rik	lincRNA	59.9568	1.189	0.218608	5.43896	5.36e-08	7.33e-07	92	98	76	87	33	42	34	30
1004	ENSMUSG00000031885	Cbfb	protein_coding	1630.5	-0.289199	0.0531983	-5.43624	5.44e-08	7.43e-07	1827	1740	1323	1380	1752	1711	1558	1826
1005	ENSMUSG00000028080	Lrba	protein_coding	1907.2	0.420031	0.0772827	5.43499	5.48e-08	7.48e-07	2568	2512	2002	2193	1616	1711	1243	1674
1006	ENSMUSG00000017561	Crlf3	protein_coding	444.872	-0.482498	0.0887948	-5.43385	5.52e-08	7.52e-07	451	398	368	359	491	502	446	539
1007	ENSMUSG00000021714	Cenpk	protein_coding	239.018	-0.68419	0.125918	-5.4336	5.52e-08	7.52e-07	248	208	156	174	322	238	290	273
1008	ENSMUSG00000045532	C1ql1	protein_coding	112.218	-1.00768	0.185575	-5.43006	5.63e-08	7.66e-07	66	102	70	77	172	132	137	130
1009	ENSMUSG00000046598	Bdh1	protein_coding	1074.21	0.397753	0.0732504	5.43005	5.63e-08	7.66e-07	1434	1514	1138	1121	875	870	887	898
1010	ENSMUSG00000009621	Vav2	protein_coding	1360.68	0.34435	0.063446	5.42745	5.72e-08	7.76e-07	2045	1753	1313	1420	1211	1127	1091	1146
1011	ENSMUSG00000047414	Flrt2	protein_coding	1008.98	0.563137	0.103774	5.42657	5.74e-08	7.79e-07	1472	1416	1061	1186	947	790	554	837
1012	ENSMUSG00000039671	Zmynd8	protein_coding	2385.55	0.35577	0.0656976	5.41527	6.12e-08	8.29e-07	3546	2998	2272	2650	2152	2049	1694	2110
1013	ENSMUSG00000024277	Mapre2	protein_coding	3327.93	0.318096	0.0587485	5.41453	6.14e-08	8.32e-07	4308	4504	3314	3604	2821	2819	2690	2965
1014	ENSMUSG00000022139	Mbnl2	protein_coding	612.072	-0.433565	0.0800891	-5.41354	6.18e-08	8.35e-07	683	596	444	507	698	714	568	710
1015	ENSMUSG00000024590	Lmnb1	protein_coding	8728.59	-0.31221	0.0576776	-5.41303	6.2e-08	8.37e-07	8885	9363	7322	7516	9534	9191	8212	10001
1016	ENSMUSG00000040675	Mthfd1l	protein_coding	488.613	-0.500651	0.0925081	-5.41196	6.23e-08	8.41e-07	436	506	370	406	571	548	508	556
1017	ENSMUSG00000058799	Nap1l1	protein_coding	9760.18	-0.233841	0.043219	-5.41061	6.28e-08	8.46e-07	11287	10618	8020	8430	10645	9881	9006	10772
1018	ENSMUSG00000032120	C2cd2l	protein_coding	662.277	0.406932	0.0752225	5.40972	6.31e-08	8.5e-07	921	911	666	726	577	511	524	560
1019	ENSMUSG00000047298	Kcnv2	protein_coding	79.1788	1.07376	0.198843	5.40004	6.66e-08	8.95e-07	117	148	99	94	42	46	53	53
1020	ENSMUSG00000029471	Camkk2	protein_coding	1063.02	0.378964	0.0702028	5.39813	6.73e-08	9.04e-07	1618	1419	1053	1073	873	860	830	965
1021	ENSMUSG00000074221	Zfp568	protein_coding	1145.49	-0.51489	0.0954378	-5.39504	6.85e-08	9.19e-07	1064	1118	893	928	1440	1397	962	1368
1022	ENSMUSG00000022340	Sybu	protein_coding	693.643	-0.413656	0.0766805	-5.39454	6.87e-08	9.2e-07	716	736	525	564	822	712	722	767
1023	ENSMUSG00000058325	Dock1	protein_coding	764.492	-0.505316	0.0936995	-5.39294	6.93e-08	9.28e-07	731	695	625	626	961	902	666	906
1024	ENSMUSG00000009378	Slc16a12	protein_coding	37.9576	-2.29365	0.425438	-5.39126	7e-08	9.35e-07	9	11	19	14	106	65	23	50
1025	ENSMUSG00000040640	Erc2	protein_coding	1177.28	0.373718	0.069332	5.39026	7.04e-08	9.4e-07	1610	1660	1214	1198	977	1050	857	1034
1026	ENSMUSG00000035969	Rusc2	protein_coding	1895.29	0.349257	0.0648189	5.38819	7.12e-08	9.5e-07	2706	2537	1992	1853	1619	1556	1595	1579
1027	ENSMUSG00000030956	Fam53b	protein_coding	581.94	0.471585	0.0875454	5.38675	7.17e-08	9.56e-07	784	878	639	587	481	474	430	476
1028	ENSMUSG00000021115	Vrk1	protein_coding	977.279	-0.370307	0.0687494	-5.38634	7.19e-08	9.58e-07	1018	1046	820	753	1072	1044	983	1105
1029	ENSMUSG00000076437	Selenoh	protein_coding	1324	-0.369529	0.068614	-5.38561	7.22e-08	9.61e-07	1386	1396	1053	1092	1494	1364	1431	1395
1030	ENSMUSG00000000631	Myo18a	protein_coding	2578.31	0.299859	0.0556866	5.38476	7.25e-08	9.64e-07	3639	3182	2541	2784	2405	2236	1919	2274
1031	ENSMUSG00000022385	Gtse1	protein_coding	676.055	-0.478238	0.0888146	-5.38468	7.26e-08	9.64e-07	650	665	524	561	791	662	759	785
1032	ENSMUSG00000061665	Cd2ap	protein_coding	940.913	-0.438573	0.0814681	-5.38337	7.31e-08	9.7e-07	985	908	735	777	1106	1128	813	1099
1033	ENSMUSG00000022322	Shcbp1	protein_coding	589.922	-0.526328	0.0977955	-5.38193	7.37e-08	9.77e-07	541	651	453	420	706	693	554	711
1034	ENSMUSG00000022973	Synj1	protein_coding	1498.22	0.419664	0.0779798	5.38171	7.38e-08	9.77e-07	2437	1895	1508	1536	1249	1274	1031	1350
1035	ENSMUSG00000039683	Sdk1	protein_coding	942.733	0.431089	0.0801224	5.38037	7.43e-08	9.83e-07	1434	1210	916	1075	847	771	627	829
1036	ENSMUSG00000066357	Wdr6	protein_coding	7017.21	0.251988	0.0468482	5.37881	7.5e-08	9.91e-07	9640	8992	6710	7278	6459	5958	5837	6176
1037	ENSMUSG00000048911	Rnf24	protein_coding	1058.81	0.352332	0.0655703	5.37336	7.73e-08	1.02e-06	1494	1434	1036	1119	952	863	779	962
1038	ENSMUSG00000022682	Rrn3	protein_coding	1971.11	0.293458	0.0546682	5.36798	7.96e-08	1.05e-06	2775	2616	1893	2017	1816	1676	1560	1711
1039	ENSMUSG00000037217	Syn1	protein_coding	773.372	0.459695	0.0856362	5.36799	7.96e-08	1.05e-06	1134	1096	744	863	594	611	648	625
1040	ENSMUSG00000018698	Lhx1	protein_coding	116.013	0.859373	0.160133	5.36663	8.02e-08	1.06e-06	210	148	141	140	80	80	80	74
1041	ENSMUSG00000041936	Agrn	protein_coding	12432.1	0.511404	0.0953262	5.36478	8.1e-08	1.07e-06	22702	14699	11952	13753	10523	10226	8838	9552
1042	ENSMUSG00000042035	Igsf3	protein_coding	1022.7	0.392851	0.0732321	5.36446	8.12e-08	1.07e-06	1460	1327	997	1173	864	861	718	938
1043	ENSMUSG00000004319	Clcn3	protein_coding	2293.47	0.332922	0.0620751	5.36322	8.18e-08	1.07e-06	3215	3021	2236	2460	1903	2090	1680	2083
1044	ENSMUSG00000027777	Schip1	protein_coding	106.19	0.922575	0.172044	5.36244	8.21e-08	1.08e-06	145	175	122	147	63	71	70	75
1045	ENSMUSG00000031546	Gins4	protein_coding	598.639	-0.41666	0.0777405	-5.35963	8.34e-08	1.09e-06	642	565	470	507	702	642	626	639
1046	ENSMUSG00000022906	Parp9	protein_coding	48.3443	-1.27341	0.237631	-5.35877	8.38e-08	1.1e-06	29	35	28	28	64	75	54	68
1047	ENSMUSG00000025950	Idh1	protein_coding	6242.8	0.326599	0.0609471	5.35873	8.38e-08	1.1e-06	8185	8482	6348	6589	5221	5040	5213	5629
1048	ENSMUSG00000028184	Adgrl2	protein_coding	3334.82	0.408438	0.0762761	5.35474	8.57e-08	1.12e-06	5333	4064	3304	3620	2973	2769	2242	2989
1049	ENSMUSG00000097518	Gm26694	lincRNA	212.544	-0.676778	0.126391	-5.35465	8.57e-08	1.12e-06	182	195	154	163	266	227	262	239
1050	ENSMUSG00000039126	Prune2	protein_coding	1006.61	0.676789	0.126402	5.35426	8.59e-08	1.12e-06	1767	1405	1021	1146	671	850	525	927
1051	ENSMUSG00000027074	Slc43a3	protein_coding	118.72	-0.813246	0.151911	-5.35344	8.63e-08	1.12e-06	103	100	81	83	167	149	116	147
1052	ENSMUSG00000024565	Sall3	protein_coding	178.645	0.874898	0.163766	5.34236	9.17e-08	1.19e-06	272	272	212	227	81	144	123	131
1053	ENSMUSG00000027499	Pkia	protein_coding	3498.89	0.33766	0.0632117	5.34173	9.21e-08	1.2e-06	4773	4833	3591	3505	2794	3044	2866	3073
1054	ENSMUSG00000031347	Cetn2	protein_coding	1027.88	-0.401623	0.0752445	-5.33757	9.42e-08	1.22e-06	1007	1126	819	822	1123	1093	1082	1161
1055	ENSMUSG00000024691	Fam111a	protein_coding	789.779	-0.525274	0.0984152	-5.33732	9.43e-08	1.22e-06	718	761	677	587	881	947	721	1016
1056	ENSMUSG00000048799	Cep120	protein_coding	1939.18	0.310243	0.0581395	5.33619	9.49e-08	1.23e-06	2570	2593	2021	1970	1658	1667	1495	1790
1057	ENSMUSG00000020799	Tekt1	protein_coding	119.625	-0.829874	0.155548	-5.33517	9.55e-08	1.24e-06	112	91	77	87	140	135	156	151
1058	ENSMUSG00000040430	Pitpnc1	protein_coding	1106.4	0.371083	0.0695543	5.33515	9.55e-08	1.24e-06	1616	1508	1080	1149	909	978	800	1001
1059	ENSMUSG00000020739	Nup85	protein_coding	1839.69	-0.319883	0.0599898	-5.33228	9.7e-08	1.25e-06	2004	1917	1511	1546	2075	1867	1916	1926
1060	ENSMUSG00000032014	Oaf	protein_coding	44.418	-1.48185	0.27796	-5.33117	9.76e-08	1.26e-06	19	34	29	17	77	58	52	63
1061	ENSMUSG00000040907	Atp1a3	protein_coding	2968.18	0.447095	0.0838774	5.33034	9.8e-08	1.27e-06	4348	4080	2833	3399	2241	2327	2577	2398
1062	ENSMUSG00000019970	Sgk1	protein_coding	153.743	-1.10366	0.207246	-5.32539	1.01e-07	1.3e-06	112	98	109	93	226	251	108	223
1063	ENSMUSG00000038375	Trp53inp2	protein_coding	3300.26	0.257084	0.0482742	5.32548	1.01e-07	1.3e-06	4601	4223	3205	3348	3082	2814	2688	2891
1064	ENSMUSG00000041313	Slc7a1	protein_coding	881.649	-0.494874	0.0929228	-5.32564	1.01e-07	1.3e-06	831	870	750	656	1013	1037	784	1114
1065	ENSMUSG00000042700	Sipa1l1	protein_coding	1625.97	-0.355529	0.0667583	-5.32561	1.01e-07	1.3e-06	1672	1682	1385	1328	1870	1667	1526	1913
1066	ENSMUSG00000005370	Msh6	protein_coding	1830.74	-0.341512	0.0641429	-5.32424	1.01e-07	1.3e-06	1880	1870	1531	1579	2093	1936	1683	2110
1067	ENSMUSG00000087006	Gm13889	protein_coding	134.245	0.879336	0.165182	5.32344	1.02e-07	1.31e-06	175	227	146	189	83	93	87	97
1068	ENSMUSG00000061787	Rps17	protein_coding	4194.5	-0.314927	0.0591608	-5.32324	1.02e-07	1.31e-06	4531	4393	3360	3649	4467	4276	4459	4504
1069	ENSMUSG00000002055	Spag5	protein_coding	1534.1	-0.359745	0.0675905	-5.32241	1.02e-07	1.31e-06	1745	1485	1285	1223	1788	1756	1394	1655
1070	ENSMUSG00000030983	Bccip	protein_coding	908.334	-0.395148	0.0742941	-5.3187	1.05e-07	1.34e-06	933	949	739	723	944	984	980	1021
1071	ENSMUSG00000030103	Bhlhe40	protein_coding	73.8458	1.05375	0.198499	5.30859	1.1e-07	1.41e-06	133	97	97	97	46	55	41	41
1072	ENSMUSG00000022858	Tra2b	protein_coding	3881.4	-0.25879	0.0487828	-5.30495	1.13e-07	1.44e-06	4279	4289	3236	3282	4161	3963	3796	4211
1073	ENSMUSG00000033721	Vav3	protein_coding	756.428	0.397363	0.0749163	5.30409	1.13e-07	1.45e-06	1053	1016	753	848	644	592	559	699
1074	ENSMUSG00000045751	Mms22l	protein_coding	700.325	-0.44617	0.0841439	-5.30246	1.14e-07	1.46e-06	692	719	538	577	853	769	627	843
1075	ENSMUSG00000027508	Pag1	protein_coding	1882.28	0.452775	0.0854003	5.30179	1.15e-07	1.46e-06	2548	2687	2003	2036	1601	1681	1157	1651
1076	ENSMUSG00000033965	Slc16a2	protein_coding	412.849	-0.461375	0.0870285	-5.30143	1.15e-07	1.46e-06	446	415	328	298	488	458	424	456
1077	ENSMUSG00000029009	Mthfr	protein_coding	1462.45	0.414934	0.0782718	5.3012	1.15e-07	1.46e-06	2426	1808	1439	1522	1260	1246	1080	1202
1078	ENSMUSG00000042644	Itpr3	protein_coding	61.8305	-1.21008	0.228423	-5.29755	1.17e-07	1.49e-06	49	37	32	41	73	107	64	86
1079	ENSMUSG00000020330	Hmmr	protein_coding	1219.19	-0.431023	0.0813828	-5.29624	1.18e-07	1.5e-06	1189	1257	991	979	1503	1367	1068	1423
1080	ENSMUSG00000029718	Pcolce	protein_coding	49.8223	-1.29231	0.244035	-5.2956	1.19e-07	1.5e-06	37	29	28	29	88	56	55	72
1081	ENSMUSG00000036103	Colec12	protein_coding	78.7372	-1.13308	0.214008	-5.29457	1.19e-07	1.51e-06	73	51	50	38	132	111	70	103
1082	ENSMUSG00000001305	Rrp15	protein_coding	527.7	-0.495535	0.0936775	-5.2898	1.22e-07	1.55e-06	535	491	458	379	583	618	503	655
1083	ENSMUSG00000042834	Nrep	protein_coding	13110.8	0.309874	0.0586449	5.28391	1.26e-07	1.6e-06	17488	17891	13059	13551	10825	10874	10914	11999
1084	ENSMUSG00000037235	Mxd4	protein_coding	1263.85	0.318914	0.0603627	5.2833	1.27e-07	1.6e-06	1675	1673	1276	1354	1100	1108	995	1087
1085	ENSMUSG00000028613	Lrp8	protein_coding	2562.22	0.365498	0.0692053	5.28136	1.28e-07	1.62e-06	3811	3251	2627	2660	2129	2361	1769	2306
1086	ENSMUSG00000039262	Prrc2b	protein_coding	12050.4	0.298963	0.0566058	5.2815	1.28e-07	1.62e-06	15955	15613	12139	12910	10846	10862	8632	10996
1087	ENSMUSG00000020471	Pold2	protein_coding	944.875	-0.501732	0.0950571	-5.27822	1.3e-07	1.64e-06	830	988	740	759	1137	976	1079	1023
1088	ENSMUSG00000029787	Avl9	protein_coding	2012.6	0.378132	0.0716537	5.27722	1.31e-07	1.65e-06	2786	2741	2002	2189	1678	1761	1368	1891
1089	ENSMUSG00000040312	Cchcr1	protein_coding	419.094	-0.52553	0.0995821	-5.27735	1.31e-07	1.65e-06	503	375	303	298	488	497	444	459
1090	ENSMUSG00000037725	Ckap2	protein_coding	911.177	-0.358001	0.0678641	-5.27527	1.33e-07	1.66e-06	938	970	744	751	1041	945	897	1024
1091	ENSMUSG00000034928	Rnf44	protein_coding	3716.74	0.262014	0.0496717	5.27491	1.33e-07	1.67e-06	5255	4686	3554	3854	3509	3185	2915	3302
1092	ENSMUSG00000004267	Eno2	protein_coding	588.466	0.605324	0.114807	5.27252	1.35e-07	1.69e-06	973	859	584	643	396	410	510	456
1093	ENSMUSG00000034656	Cacna1a	protein_coding	867.978	0.50854	0.0964633	5.27185	1.35e-07	1.69e-06	1519	1074	908	891	669	660	628	780
1094	ENSMUSG00000025574	Tk1	protein_coding	626.53	-0.453439	0.0860661	-5.2685	1.38e-07	1.72e-06	604	624	531	486	731	667	686	673
1095	ENSMUSG00000022076	Klhl1	protein_coding	487.217	0.467541	0.0887558	5.26772	1.38e-07	1.73e-06	664	718	536	496	398	378	370	414
1096	ENSMUSG00000022945	Chaf1b	protein_coding	558.827	-0.476865	0.0905317	-5.26738	1.38e-07	1.73e-06	535	590	398	469	662	604	609	603
1097	ENSMUSG00000025764	Jade1	protein_coding	905.695	-0.477296	0.0906522	-5.26513	1.4e-07	1.75e-06	846	932	728	712	1035	1096	797	1107
1098	ENSMUSG00000056812	St8sia3	protein_coding	474.489	0.460031	0.0873756	5.26499	1.4e-07	1.75e-06	639	684	514	505	397	397	360	369
1099	ENSMUSG00000022376	Adcy8	protein_coding	54.224	1.64591	0.312695	5.26363	1.41e-07	1.76e-06	92	68	78	105	18	44	18	20
1100	ENSMUSG00000024601	Isoc1	protein_coding	1167.22	-0.41026	0.0780376	-5.25721	1.46e-07	1.82e-06	1139	1301	943	893	1315	1271	1118	1386
1101	ENSMUSG00000068220	Lgals1	protein_coding	137.849	-1.00423	0.191114	-5.25464	1.48e-07	1.84e-06	88	86	107	101	212	148	179	160
1102	ENSMUSG00000040478	Prdm13	protein_coding	1176.37	-0.431489	0.0821908	-5.24984	1.52e-07	1.89e-06	1095	1291	942	933	1253	1361	1176	1364
1103	ENSMUSG00000008683	Rps15a	protein_coding	5188.45	-0.245157	0.0467143	-5.248	1.54e-07	1.91e-06	5764	5424	4458	4563	5507	5273	5010	5682
1104	ENSMUSG00000022433	Csnk1e	protein_coding	4117.82	0.313308	0.0597334	5.24511	1.56e-07	1.94e-06	5745	5400	3997	4369	3761	3288	3472	3473
1105	ENSMUSG00000033222	Ttf2	protein_coding	891.008	-0.372011	0.0709281	-5.24491	1.56e-07	1.94e-06	929	901	707	770	1031	1011	822	977
1106	ENSMUSG00000044156	Hepacam2	protein_coding	50.4278	-1.29511	0.246998	-5.24342	1.58e-07	1.95e-06	35	39	33	18	83	69	60	62
1107	ENSMUSG00000024538	Ppic	protein_coding	342.999	-0.677165	0.129178	-5.24212	1.59e-07	1.96e-06	258	302	283	266	472	413	348	378
1108	ENSMUSG00000062031	Pgghg	protein_coding	358.659	-0.551743	0.105288	-5.24032	1.6e-07	1.98e-06	335	346	249	307	428	432	392	372
1109	ENSMUSG00000057880	Abat	protein_coding	2473.45	-0.320397	0.0611781	-5.23712	1.63e-07	2.01e-06	2616	2640	2052	2066	2688	2784	2227	2802
1110	ENSMUSG00000074305	Peak1	protein_coding	386.303	-0.666938	0.127358	-5.2367	1.63e-07	2.01e-06	398	312	271	294	493	521	311	495
1111	ENSMUSG00000053012	Krcc1	protein_coding	410.182	-0.446526	0.0852738	-5.23637	1.64e-07	2.01e-06	430	389	338	322	471	461	403	471
1112	ENSMUSG00000025037	Maoa	protein_coding	631.528	-0.403497	0.0770896	-5.23413	1.66e-07	2.04e-06	648	670	489	514	699	664	628	755
1113	ENSMUSG00000051339	2900026A02Rik	protein_coding	236.948	-0.687106	0.131315	-5.23249	1.67e-07	2.05e-06	178	238	160	193	280	292	258	284
1114	ENSMUSG00000051378	Kif18b	protein_coding	581.016	-0.510112	0.0974972	-5.23207	1.68e-07	2.06e-06	504	609	472	448	727	660	573	647
1115	ENSMUSG00000045394	Epcam	protein_coding	75.2762	-1.04027	0.198893	-5.2303	1.69e-07	2.07e-06	62	54	51	43	116	81	79	112
1116	ENSMUSG00000070407	Hs3st3b1	protein_coding	175.244	0.747224	0.142979	5.2261	1.73e-07	2.12e-06	243	284	209	199	140	100	123	136
1117	ENSMUSG00000030867	Plk1	protein_coding	1113.42	-0.451459	0.0863991	-5.22528	1.74e-07	2.13e-06	1050	1093	861	981	1360	1185	1207	1147
1118	ENSMUSG00000049932	H2afx	protein_coding	2730.19	-0.446158	0.0854058	-5.22397	1.75e-07	2.14e-06	2472	2794	2225	2289	3219	2781	3062	2924
1119	ENSMUSG00000043091	Tuba1c	protein_coding	272.844	-0.635189	0.121622	-5.22263	1.76e-07	2.16e-06	219	258	209	217	330	294	324	314
1120	ENSMUSG00000030376	Slc8a2	protein_coding	800.066	0.539604	0.10335	5.22113	1.78e-07	2.17e-06	1062	1165	823	978	579	575	680	643
1121	ENSMUSG00000038379	Ttk	protein_coding	776.535	-0.49016	0.0938949	-5.22031	1.79e-07	2.18e-06	677	807	585	668	898	843	764	960
1122	ENSMUSG00000029111	Nelfa	protein_coding	1037.14	-0.349964	0.0670759	-5.21743	1.81e-07	2.21e-06	1100	1079	837	871	1182	1029	1060	1162
1123	ENSMUSG00000039231	Suv39h1	protein_coding	1128.51	-0.323048	0.0619234	-5.21689	1.82e-07	2.22e-06	1203	1180	936	952	1283	1184	1123	1194
1124	ENSMUSG00000040722	Scamp5	protein_coding	1316.47	0.356385	0.0683258	5.21596	1.83e-07	2.22e-06	1904	1718	1326	1375	1082	1106	1125	1082
1125	ENSMUSG00000028519	Dab1	protein_coding	527.463	-0.514009	0.0985491	-5.21577	1.83e-07	2.22e-06	485	600	386	387	617	576	545	631
1126	ENSMUSG00000028567	Txndc12	protein_coding	816.692	-0.367455	0.0704704	-5.21431	1.85e-07	2.24e-06	887	831	682	644	980	874	781	880
1127	ENSMUSG00000000901	Mmp11	protein_coding	319.239	-0.530026	0.101658	-5.21381	1.85e-07	2.24e-06	308	299	225	279	393	353	331	362
1128	ENSMUSG00000020277	Pfkl	protein_coding	4444.72	0.373984	0.0717426	5.21286	1.86e-07	2.25e-06	6224	5981	4331	4904	3692	3508	3890	3632
1129	ENSMUSG00000053553	3110082I17Rik	protein_coding	241.274	-0.605203	0.116096	-5.21297	1.86e-07	2.25e-06	214	224	182	192	315	282	255	258
1130	ENSMUSG00000033392	Clasp2	protein_coding	3803.96	0.351503	0.0674765	5.20927	1.9e-07	2.29e-06	5780	4977	3555	4020	3094	3376	2820	3479
1131	ENSMUSG00000030704	Rab6a	protein_coding	4177.1	0.283328	0.0544058	5.20768	1.91e-07	2.31e-06	5508	5685	4151	4244	3647	3509	3372	3849
1132	ENSMUSG00000030350	Prmt8	protein_coding	150.95	0.88055	0.16922	5.2036	1.95e-07	2.36e-06	243	225	195	170	91	88	131	92
1133	ENSMUSG00000005871	Apc	protein_coding	7633	0.498797	0.0958851	5.20203	1.97e-07	2.38e-06	11029	10584	8048	8505	6035	6720	4356	7166
1134	ENSMUSG00000069227	Gprin1	protein_coding	3290	0.382638	0.0735635	5.20146	1.98e-07	2.38e-06	4347	4561	3382	3572	2646	2540	2819	2862
1135	ENSMUSG00000054976	Nyap2	protein_coding	1290.54	0.457658	0.0881096	5.19419	2.06e-07	2.48e-06	1818	1877	1318	1378	909	1139	928	1175
1136	ENSMUSG00000058558	Rpl5	protein_coding	4244.54	-0.253165	0.0487602	-5.19205	2.08e-07	2.5e-06	4673	4659	3536	3653	4414	4456	4152	4581
1137	ENSMUSG00000035954	Dock4	protein_coding	829.609	0.460546	0.0887095	5.19162	2.08e-07	2.51e-06	1258	1054	864	930	703	737	511	724
1138	ENSMUSG00000061603	Akap6	protein_coding	2139.93	0.479993	0.0924583	5.19145	2.09e-07	2.51e-06	3156	2917	2130	2457	1896	1723	1255	1986
1139	ENSMUSG00000027221	Chst1	protein_coding	467.656	0.456717	0.088016	5.18903	2.11e-07	2.54e-06	700	652	467	500	380	367	385	370
1140	ENSMUSG00000040857	Erf	protein_coding	531.475	-0.590252	0.113815	-5.18608	2.15e-07	2.58e-06	426	498	442	420	619	568	637	603
1141	ENSMUSG00000041741	Pde3a	protein_coding	449.56	-0.614139	0.118584	-5.17894	2.23e-07	2.67e-06	360	476	322	350	474	501	518	577
1142	ENSMUSG00000028059	Arhgef2	protein_coding	2508.63	0.36311	0.0701172	5.17861	2.24e-07	2.68e-06	4034	3036	2466	2596	2136	2125	1963	2149
1143	ENSMUSG00000021391	Cenpp	protein_coding	201.707	-0.604811	0.116826	-5.17703	2.25e-07	2.7e-06	197	182	154	149	238	255	203	233
1144	ENSMUSG00000047875	Gpr157	protein_coding	127.994	-0.762715	0.147426	-5.17355	2.3e-07	2.75e-06	105	121	84	94	155	152	154	152
1145	ENSMUSG00000028439	Fam219a	protein_coding	1466.27	0.375577	0.0726476	5.16984	2.34e-07	2.8e-06	2070	1921	1522	1554	1257	1214	1259	1126
1146	ENSMUSG00000037820	Tgm2	protein_coding	155.503	-1.06142	0.205491	-5.16527	2.4e-07	2.86e-06	76	150	103	95	175	179	226	217
1147	ENSMUSG00000086029	Pax6os1	antisense	84.1243	-0.931439	0.180428	-5.16238	2.44e-07	2.9e-06	74	59	61	52	97	104	104	115
1148	ENSMUSG00000006586	Runx1t1	protein_coding	1308.31	0.440999	0.0854954	5.15816	2.49e-07	2.97e-06	1814	1869	1352	1402	922	1111	992	1207
1149	ENSMUSG00000031367	Ap1s2	protein_coding	943.326	0.418274	0.0810969	5.15771	2.5e-07	2.97e-06	1545	1195	937	967	761	761	747	811
1150	ENSMUSG00000022594	Lynx1	protein_coding	69.0873	-1.55872	0.302297	-5.15626	2.52e-07	2.99e-06	55	41	24	32	79	167	85	62
1151	ENSMUSG00000025935	Tram1	protein_coding	726.856	-0.407371	0.0790094	-5.15598	2.52e-07	2.99e-06	719	771	605	566	873	794	696	803
1152	ENSMUSG00000042826	Fgf11	protein_coding	337.834	0.540044	0.104739	5.15609	2.52e-07	2.99e-06	531	466	338	381	241	268	275	264
1153	ENSMUSG00000017386	Traf4	protein_coding	2365.97	0.400302	0.0776504	5.15518	2.53e-07	3e-06	3122	3193	2469	2658	2017	1757	2034	1952
1154	ENSMUSG00000033752	Mnd1	protein_coding	65.4297	-1.21029	0.234878	-5.15284	2.57e-07	3.04e-06	32	51	31	52	88	85	88	86
1155	ENSMUSG00000000056	Narf	protein_coding	2768.87	0.284568	0.0552309	5.15233	2.57e-07	3.04e-06	3762	3701	2696	2847	2455	2497	2064	2526
1156	ENSMUSG00000055421	Pcdh9	protein_coding	643.331	0.51873	0.100736	5.14941	2.61e-07	3.09e-06	1092	892	608	683	529	527	403	568
1157	ENSMUSG00000024130	Abca3	protein_coding	1443.1	0.341385	0.0664007	5.14129	2.73e-07	3.22e-06	2077	1860	1380	1584	1366	1218	1060	1223
1158	ENSMUSG00000051391	Ywhag	protein_coding	10606.2	0.282711	0.0549904	5.14108	2.73e-07	3.22e-06	13852	14008	10408	11349	9387	8634	8723	9756
1159	ENSMUSG00000078249	Hmga1b	protein_coding	470.129	-0.687896	0.133822	-5.1404	2.74e-07	3.23e-06	359	453	352	357	613	457	613	520
1160	ENSMUSG00000022422	Dscc1	protein_coding	177.863	-0.644388	0.125404	-5.13851	2.77e-07	3.26e-06	175	145	140	130	215	207	201	203
1161	ENSMUSG00000031262	Cenpi	protein_coding	386.79	-0.456866	0.0889698	-5.13506	2.82e-07	3.32e-06	429	385	279	305	467	433	378	433
1162	ENSMUSG00000030079	Ruvbl1	protein_coding	835.87	-0.405124	0.0789022	-5.1345	2.83e-07	3.33e-06	823	890	667	682	993	840	873	926
1163	ENSMUSG00000100706	Gm19744	processed_transcript	116.229	0.81129	0.15802	5.13411	2.83e-07	3.33e-06	206	159	135	135	94	88	65	76
1164	ENSMUSG00000028800	Hdac1	protein_coding	1230.99	-0.31569	0.061502	-5.133	2.85e-07	3.35e-06	1430	1219	989	1049	1422	1308	1171	1313
1165	ENSMUSG00000026792	Lrsam1	protein_coding	596.224	0.374008	0.0728676	5.13271	2.86e-07	3.35e-06	861	791	597	631	513	509	443	519
1166	ENSMUSG00000022537	Tmem44	protein_coding	947.696	0.467493	0.0911814	5.12707	2.94e-07	3.45e-06	1620	1124	956	1028	817	749	723	746
1167	ENSMUSG00000022816	Fstl1	protein_coding	2057.27	-0.506754	0.0988636	-5.12578	2.96e-07	3.47e-06	1775	2030	1710	1661	2606	2429	1769	2452
1168	ENSMUSG00000023961	Enpp4	protein_coding	136.706	-0.761604	0.148676	-5.12259	3.01e-07	3.53e-06	114	129	101	88	157	154	153	192
1169	ENSMUSG00000045932	Ifit2	protein_coding	125.507	-0.846305	0.165318	-5.11925	3.07e-07	3.59e-06	110	125	81	70	159	158	118	184
1170	ENSMUSG00000028933	Xrcc2	protein_coding	324.543	-0.515205	0.100726	-5.11491	3.14e-07	3.67e-06	354	315	250	227	395	382	301	384
1171	ENSMUSG00000024805	Pcgf5	protein_coding	174.786	-0.727333	0.142219	-5.11417	3.15e-07	3.68e-06	155	140	141	122	216	228	157	233
1172	ENSMUSG00000021760	Gpx8	protein_coding	426.703	-0.489245	0.0956813	-5.11328	3.17e-07	3.69e-06	395	435	328	351	541	464	414	485
1173	ENSMUSG00000022946	Dopey2	protein_coding	887.237	0.342988	0.0671406	5.1085	3.25e-07	3.78e-06	1239	1170	889	941	740	798	663	786
1174	ENSMUSG00000004347	Pde1c	protein_coding	717.195	0.555002	0.108692	5.10618	3.29e-07	3.83e-06	1295	897	735	757	600	591	430	606
1175	ENSMUSG00000018932	Map2k3	protein_coding	386.044	-0.536635	0.105134	-5.10428	3.32e-07	3.86e-06	356	379	306	297	478	434	439	388
1176	ENSMUSG00000048385	Scrt1	protein_coding	2186.35	0.408153	0.0799683	5.10393	3.33e-07	3.87e-06	2842	3132	2262	2383	1786	1670	1878	1813
1177	ENSMUSG00000078532	Nkain1	protein_coding	1882.96	0.382551	0.0749676	5.10288	3.35e-07	3.89e-06	2366	2450	2028	2173	1701	1462	1441	1635
1178	ENSMUSG00000031166	Wdr13	protein_coding	2269.08	0.303416	0.0594618	5.10271	3.35e-07	3.89e-06	3299	2971	2281	2201	1909	2042	1811	1987
1179	ENSMUSG00000047604	Frat2	protein_coding	834.427	-0.473983	0.0928958	-5.1023	3.36e-07	3.89e-06	808	820	649	690	859	884	998	944
1180	ENSMUSG00000028044	Cks1b	protein_coding	842.523	-0.483444	0.0947582	-5.10187	3.36e-07	3.9e-06	739	874	702	660	958	886	951	943
1181	ENSMUSG00000023004	Tuba1b	protein_coding	4910.65	-0.414259	0.0812656	-5.0976	3.44e-07	3.98e-06	4493	5076	4006	4235	5356	5128	5463	5403
1182	ENSMUSG00000033502	Cdc14a	protein_coding	599.947	-0.465431	0.0913564	-5.09468	3.49e-07	4.04e-06	644	583	474	454	748	700	513	706
1183	ENSMUSG00000028851	Nudc	protein_coding	2691.12	-0.362743	0.0712386	-5.09195	3.54e-07	4.09e-06	2710	2894	2237	2179	2861	2781	2948	2931
1184	ENSMUSG00000026426	Arl8a	protein_coding	2369.12	0.363179	0.0713938	5.08699	3.64e-07	4.2e-06	3334	3220	2317	2533	1941	1912	2071	1958
1185	ENSMUSG00000020297	Nsg2	protein_coding	5388.23	0.359832	0.070819	5.08101	3.75e-07	4.33e-06	7518	7282	5388	5702	4167	4321	4626	4843
1186	ENSMUSG00000070871	Ccnyl1	protein_coding	675.73	-0.368794	0.0726011	-5.07973	3.78e-07	4.35e-06	730	723	509	561	772	719	679	737
1187	ENSMUSG00000035274	Tpbg	protein_coding	183.33	-0.908649	0.178884	-5.07953	3.78e-07	4.35e-06	112	173	141	111	198	205	230	277
1188	ENSMUSG00000034487	Kdelc2	protein_coding	118.153	-0.811188	0.159718	-5.07888	3.8e-07	4.37e-06	92	98	75	98	158	133	139	143
1189	ENSMUSG00000030432	Rpl28	protein_coding	2522.89	-0.31054	0.0611468	-5.07859	3.8e-07	4.37e-06	2721	2682	2012	2189	2741	2655	2651	2590
1190	ENSMUSG00000038349	Plcl1	protein_coding	609.801	0.446887	0.0879958	5.07851	3.8e-07	4.37e-06	841	847	656	656	535	458	410	572
1191	ENSMUSG00000039477	Tnrc18	protein_coding	4370.22	0.256348	0.0504906	5.07715	3.83e-07	4.39e-06	5837	5403	4469	4547	4121	3633	3457	3999
1192	ENSMUSG00000041718	Alg13	protein_coding	461.839	-0.417977	0.0823836	-5.07354	3.9e-07	4.48e-06	490	451	371	374	521	533	435	529
1193	ENSMUSG00000014601	Strip1	protein_coding	2744.05	0.294847	0.0581231	5.0728	3.92e-07	4.49e-06	3689	3613	2695	2906	2402	2302	2340	2343
1194	ENSMUSG00000030930	Chst15	protein_coding	652.101	0.507219	0.100057	5.06932	3.99e-07	4.56e-06	940	916	663	752	624	507	388	547
1195	ENSMUSG00000055373	Fut9	protein_coding	232.649	0.654991	0.129206	5.06935	3.99e-07	4.56e-06	390	313	240	278	175	187	127	204
1196	ENSMUSG00000029861	Fam131b	protein_coding	832.108	0.403872	0.0797169	5.06633	4.06e-07	4.63e-06	1136	1201	836	879	677	659	695	697
1197	ENSMUSG00000019920	Lims1	protein_coding	1328.08	-0.379224	0.0748716	-5.06499	4.08e-07	4.66e-06	1410	1373	1079	1065	1635	1448	1154	1514
1198	ENSMUSG00000001802	Lrp3	protein_coding	1505.81	0.305078	0.0602428	5.06413	4.1e-07	4.68e-06	2089	1895	1531	1584	1360	1230	1262	1282
1199	ENSMUSG00000039396	Neil3	protein_coding	619.297	-0.502778	0.0993462	-5.06087	4.17e-07	4.76e-06	671	519	496	495	636	786	600	750
1200	ENSMUSG00000022021	Diaph3	protein_coding	291.682	-0.55157	0.109065	-5.05728	4.25e-07	4.84e-06	262	286	224	233	356	333	271	366
1201	ENSMUSG00000001870	Ltbp1	protein_coding	390.63	-1.89144	0.374075	-5.05632	4.27e-07	4.86e-06	187	169	180	162	832	734	222	598
1202	ENSMUSG00000025925	Terf1	protein_coding	420.785	-0.457718	0.0906093	-5.05156	4.38e-07	4.98e-06	420	422	353	315	472	499	408	480
1203	ENSMUSG00000018661	Cog1	protein_coding	920.653	0.33272	0.0658684	5.05128	4.39e-07	4.98e-06	1336	1165	916	972	832	777	737	763
1204	ENSMUSG00000071064	Zfp827	protein_coding	982.112	0.375497	0.0743954	5.04731	4.48e-07	5.08e-06	1329	1279	1030	1082	868	898	680	822
1205	ENSMUSG00000029752	Asns	protein_coding	561.748	-0.492427	0.0975687	-5.04697	4.49e-07	5.09e-06	625	553	396	430	577	582	651	690
1206	ENSMUSG00000020680	Taf15	protein_coding	2455.1	-0.364489	0.0722575	-5.0443	4.55e-07	5.15e-06	2641	2486	1941	2085	2564	2747	2201	3059
1207	ENSMUSG00000026735	Ptf1a	protein_coding	231.93	-0.730848	0.144907	-5.04355	4.57e-07	5.16e-06	160	242	161	175	267	278	276	280
1208	ENSMUSG00000036678	Aaas	protein_coding	680.218	-0.449486	0.0891242	-5.04337	4.57e-07	5.17e-06	709	651	539	550	830	661	768	731
1209	ENSMUSG00000021130	Galnt16	protein_coding	479.52	0.478195	0.0948233	5.04302	4.58e-07	5.17e-06	677	685	482	542	449	345	332	407
1210	ENSMUSG00000053550	Shisa7	protein_coding	404.156	0.698595	0.13857	5.04147	4.62e-07	5.21e-06	786	529	388	463	245	319	310	298
1211	ENSMUSG00000024426	Atat1	protein_coding	2366.35	0.46286	0.0918526	5.03916	4.68e-07	5.27e-06	3926	3061	2309	2517	1971	1752	2049	1792
1212	ENSMUSG00000028137	Celf3	protein_coding	5033.75	0.440365	0.0874113	5.03785	4.71e-07	5.3e-06	8476	6079	4964	5417	4130	3982	4251	3881
1213	ENSMUSG00000027784	Ppm1l	protein_coding	1401.92	0.446345	0.0886611	5.03428	4.8e-07	5.39e-06	2009	1828	1434	1622	1202	1213	849	1286
1214	ENSMUSG00000021973	Micu2	protein_coding	1034.87	-0.366085	0.0727459	-5.03238	4.84e-07	5.44e-06	1013	1095	879	853	1154	1134	991	1170
1215	ENSMUSG00000048022	Tmem229a	protein_coding	490.592	0.515651	0.102549	5.02833	4.95e-07	5.56e-06	666	788	508	511	373	397	341	432
1216	ENSMUSG00000025862	Stag2	protein_coding	3146.06	-0.367881	0.0731784	-5.02718	4.98e-07	5.59e-06	3254	3400	2521	2547	3543	3630	2705	3696
1217	ENSMUSG00000036402	Gng12	protein_coding	482.049	-0.469514	0.0934036	-5.02672	4.99e-07	5.59e-06	458	514	385	366	580	525	451	585
1218	ENSMUSG00000000782	Tcf7	protein_coding	81.9005	-1.4443	0.287846	-5.01762	5.23e-07	5.85e-06	32	58	53	41	162	133	57	110
1219	ENSMUSG00000026134	Prim2	protein_coding	607.235	-0.42136	0.0839737	-5.01776	5.23e-07	5.85e-06	587	622	515	481	727	630	609	687
1220	ENSMUSG00000030020	Prickle2	protein_coding	347.18	0.509249	0.101483	5.01808	5.22e-07	5.85e-06	526	490	340	393	282	273	225	317
1221	ENSMUSG00000052155	Acvr2a	protein_coding	1275.78	0.369703	0.0736776	5.01785	5.23e-07	5.85e-06	1796	1764	1247	1352	1043	1093	904	1217
1222	ENSMUSG00000036617	Etl4	protein_coding	420.12	-0.643067	0.128179	-5.01693	5.25e-07	5.86e-06	410	354	314	318	580	542	328	518
1223	ENSMUSG00000026414	Tnnt2	protein_coding	38.3662	-1.93623	0.386117	-5.01462	5.31e-07	5.93e-06	7	24	19	16	34	59	81	54
1224	ENSMUSG00000044201	Cdc25c	protein_coding	384.603	-0.470142	0.093781	-5.01319	5.35e-07	5.97e-06	410	372	295	300	430	422	439	409
1225	ENSMUSG00000058690	Ccser2	protein_coding	1359.79	0.408499	0.0814961	5.0125	5.37e-07	5.98e-06	1941	1806	1416	1461	1204	1192	848	1235
1226	ENSMUSG00000029687	Ezh2	protein_coding	3861.93	-0.219599	0.0438897	-5.00343	5.63e-07	6.26e-06	4566	4166	3242	3289	4045	4039	3615	4164
1227	ENSMUSG00000015094	Npdc1	protein_coding	1521.58	0.554133	0.110761	5.00295	5.65e-07	6.27e-06	2745	1985	1430	1671	1212	1181	1265	1027
1228	ENSMUSG00000004268	Emg1	protein_coding	1395.04	-0.336992	0.0673643	-5.00252	5.66e-07	6.28e-06	1434	1443	1180	1181	1584	1398	1440	1513
1229	ENSMUSG00000062328	Rpl17	protein_coding	3257.81	-0.313725	0.0627244	-5.00165	5.68e-07	6.31e-06	3402	3525	2662	2782	3424	3304	3419	3605
1230	ENSMUSG00000037169	Mycn	protein_coding	2747.35	0.29759	0.0595933	4.99368	5.92e-07	6.57e-06	3686	3602	2625	3013	2455	2263	2286	2392
1231	ENSMUSG00000030739	Myh14	protein_coding	200.183	-1.02879	0.206113	-4.99141	5.99e-07	6.64e-06	139	172	125	123	164	303	320	226
1232	ENSMUSG00000043542	Zc2hc1a	protein_coding	1492.13	0.314154	0.0629551	4.99013	6.03e-07	6.68e-06	2122	2045	1409	1522	1272	1283	1180	1343
1233	ENSMUSG00000044071	Fam19a2	protein_coding	170.697	0.681124	0.136553	4.98799	6.1e-07	6.75e-06	254	239	187	215	155	109	111	126
1234	ENSMUSG00000044288	Cnr1	protein_coding	1383.47	0.5182	0.103892	4.98789	6.1e-07	6.75e-06	2423	1907	1265	1466	1251	1043	867	1201
1235	ENSMUSG00000070570	Slc17a7	protein_coding	53.8635	1.34789	0.270366	4.98542	6.18e-07	6.83e-06	106	99	51	78	26	23	42	24
1236	ENSMUSG00000034813	Grip1	protein_coding	1538.76	0.298886	0.0599745	4.98354	6.24e-07	6.89e-06	2001	2056	1556	1620	1353	1310	1192	1413
1237	ENSMUSG00000052302	Tbc1d30	protein_coding	1243.75	0.355566	0.071382	4.98118	6.32e-07	6.96e-06	1625	1660	1326	1326	993	1077	942	1152
1238	ENSMUSG00000060961	Slc4a4	protein_coding	191.635	-0.682404	0.136996	-4.98118	6.32e-07	6.96e-06	175	161	149	140	250	232	165	258
1239	ENSMUSG00000025938	Slco5a1	protein_coding	1483.83	0.458053	0.0919656	4.9807	6.34e-07	6.97e-06	2368	1922	1482	1604	1188	1316	916	1371
1240	ENSMUSG00000019359	Gdpd2	protein_coding	47.809	1.33301	0.267695	4.97959	6.37e-07	7.01e-06	107	82	52	57	35	27	25	17
1241	ENSMUSG00000028066	Pmf1	protein_coding	562.478	-0.544753	0.109443	-4.9775	6.44e-07	7.07e-06	504	546	465	423	643	599	701	590
1242	ENSMUSG00000031169	Porcn	protein_coding	448.842	0.668226	0.134397	4.97203	6.63e-07	7.27e-06	871	576	433	506	341	318	365	294
1243	ENSMUSG00000026478	Lamc1	protein_coding	854.747	-0.602754	0.121298	-4.9692	6.72e-07	7.37e-06	729	784	636	719	1181	1080	691	1005
1244	ENSMUSG00000036473	Tbc1d24	protein_coding	1097.04	0.340192	0.0684892	4.96709	6.8e-07	7.44e-06	1612	1446	1099	1100	939	976	786	1002
1245	ENSMUSG00000002365	Snx9	protein_coding	351.939	-0.522685	0.105239	-4.96664	6.81e-07	7.45e-06	317	340	299	268	431	419	334	401
1246	ENSMUSG00000000826	Dnajc5	protein_coding	4171.85	0.281284	0.0566624	4.96421	6.9e-07	7.54e-06	5304	5553	4247	4374	3627	3589	3276	3885
1247	ENSMUSG00000000276	Dgke	protein_coding	488.275	0.475797	0.0958826	4.96228	6.97e-07	7.61e-06	740	705	478	517	368	380	410	397
1248	ENSMUSG00000038119	Cdon	protein_coding	2291.01	-0.919494	0.18541	-4.95925	7.08e-07	7.72e-06	1701	1883	1535	1581	3606	3166	1823	2942
1249	ENSMUSG00000046836	Brox	protein_coding	1576.38	0.288049	0.0581034	4.95752	7.14e-07	7.78e-06	2280	2075	1527	1556	1400	1379	1257	1383
1250	ENSMUSG00000048327	Ckap2l	protein_coding	1343.57	-0.402685	0.0813171	-4.95203	7.34e-07	8e-06	1255	1383	1139	1123	1588	1499	1223	1540
1251	ENSMUSG00000022708	Zbtb20	protein_coding	1000.41	0.673128	0.135943	4.95156	7.36e-07	8.01e-06	1894	1307	1121	995	745	802	499	918
1252	ENSMUSG00000067274	Rplp0	protein_coding	9247.79	-0.373597	0.0754613	-4.95084	7.39e-07	8.03e-06	11341	8776	7025	7470	9468	10675	8606	11140
1253	ENSMUSG00000037606	Osbpl5	protein_coding	445.348	0.470209	0.0950103	4.94903	7.46e-07	8.1e-06	727	542	463	485	348	372	322	384
1254	ENSMUSG00000042210	Abhd14a	protein_coding	197.383	-0.626095	0.126547	-4.94754	7.52e-07	8.16e-06	186	202	136	140	210	234	233	235
1255	ENSMUSG00000035513	Ntng2	protein_coding	630.909	0.526544	0.106442	4.94677	7.55e-07	8.18e-06	1051	853	692	609	471	502	535	457
1256	ENSMUSG00000007050	Lsm2	protein_coding	722.987	-0.438551	0.0887054	-4.94391	7.66e-07	8.29e-06	770	755	554	549	836	706	832	793
1257	ENSMUSG00000021557	Agtpbp1	protein_coding	1289.14	0.363355	0.0734959	4.94388	7.66e-07	8.29e-06	1971	1646	1277	1332	1111	1112	890	1203
1258	ENSMUSG00000040658	Dnph1	protein_coding	479.984	-0.548677	0.111026	-4.94188	7.74e-07	8.37e-06	388	475	394	387	560	498	534	579
1259	ENSMUSG00000020701	Tmem132e	protein_coding	1229.37	0.415717	0.0841385	4.94087	7.78e-07	8.4e-06	1730	1561	1189	1501	1131	945	968	973
1260	ENSMUSG00000023963	Cyp39a1	protein_coding	460.807	-0.432258	0.0874866	-4.94085	7.78e-07	8.4e-06	479	478	374	345	521	514	430	559
1261	ENSMUSG00000015133	Lrrk1	protein_coding	87.1421	-1.11492	0.225661	-4.94068	7.79e-07	8.4e-06	38	67	63	61	131	112	93	119
1262	ENSMUSG00000025207	Sema4g	protein_coding	1494.77	0.54647	0.110641	4.93913	7.85e-07	8.46e-06	2886	1800	1467	1544	1192	1198	1110	1133
1263	ENSMUSG00000031214	Ophn1	protein_coding	700.962	0.379833	0.0769158	4.93829	7.88e-07	8.49e-06	1046	927	665	762	607	588	501	634
1264	ENSMUSG00000022892	App	protein_coding	5860.41	0.235458	0.0476852	4.93775	7.9e-07	8.5e-06	7683	7626	5724	6013	5569	5087	4608	5299
1265	ENSMUSG00000100215	Gm8292	processed_pseudogene	509.729	-0.43736	0.0885739	-4.9378	7.9e-07	8.5e-06	515	538	396	399	573	518	569	573
1266	ENSMUSG00000068735	Trp53i11	protein_coding	4574.62	0.316981	0.0642241	4.93555	7.99e-07	8.59e-06	6051	6052	4418	5104	4166	3700	3820	3839
1267	ENSMUSG00000027296	Itpka	protein_coding	113.259	-0.913281	0.185048	-4.93538	8e-07	8.59e-06	78	80	88	83	142	116	153	150
1268	ENSMUSG00000072825	Cep170b	protein_coding	1816.35	0.3104	0.0628959	4.93513	8.01e-07	8.6e-06	2361	2350	1876	1961	1516	1535	1506	1621
1269	ENSMUSG00000035456	Prdm8	protein_coding	165.405	0.688805	0.139658	4.93208	8.14e-07	8.73e-06	279	224	180	192	137	97	114	136
1270	ENSMUSG00000041895	Wipi1	protein_coding	499.441	-0.532146	0.107908	-4.93148	8.16e-07	8.75e-06	434	467	393	430	516	631	504	600
1271	ENSMUSG00000030302	Atp2b2	protein_coding	536.103	0.463793	0.094057	4.93098	8.18e-07	8.76e-06	793	694	548	617	375	456	414	472
1272	ENSMUSG00000039735	Fnbp1l	protein_coding	6539.05	0.32237	0.0653782	4.93085	8.19e-07	8.76e-06	9750	8470	6325	6657	5583	5821	4632	6197
1273	ENSMUSG00000049336	Tenm2	protein_coding	922.839	0.473487	0.0960321	4.93051	8.2e-07	8.77e-06	1275	1267	995	1031	681	855	586	834
1274	ENSMUSG00000020300	Cpeb4	protein_coding	1299.65	0.402427	0.0816539	4.92845	8.29e-07	8.85e-06	1965	1727	1272	1386	1161	1061	843	1226
1275	ENSMUSG00000061911	Myt1l	protein_coding	1073.72	0.393423	0.0798947	4.92426	8.47e-07	9.03e-06	1669	1390	1034	1145	908	951	724	970
1276	ENSMUSG00000061689	Dlgap4	protein_coding	2572.77	0.307705	0.0625239	4.9214	8.59e-07	9.16e-06	3752	3302	2520	2623	2282	2094	2211	2171
1277	ENSMUSG00000032036	Kirrel3	protein_coding	227.453	0.598827	0.121695	4.92072	8.62e-07	9.19e-06	344	339	237	253	160	170	189	169
1278	ENSMUSG00000045215	Asxl3	protein_coding	1447.45	0.472414	0.0960343	4.91922	8.69e-07	9.25e-06	2190	2003	1489	1533	1191	1288	841	1332
1279	ENSMUSG00000045994	B3gat1	protein_coding	651.609	0.484196	0.0984345	4.91897	8.7e-07	9.25e-06	1085	869	630	691	473	505	533	558
1280	ENSMUSG00000040721	Zfhx2	protein_coding	1982.09	0.434623	0.0883746	4.91797	8.74e-07	9.29e-06	3343	2461	1858	2159	1610	1707	1357	1774
1281	ENSMUSG00000048747	E130114P18Rik	protein_coding	740.225	-0.369629	0.0751659	-4.9175	8.77e-07	9.31e-06	765	816	575	603	802	781	748	853
1282	ENSMUSG00000015053	Gata2	protein_coding	43.5093	1.35485	0.275591	4.91618	8.83e-07	9.37e-06	70	78	52	66	14	22	25	32
1283	ENSMUSG00000033596	Rfwd3	protein_coding	1502.73	-0.348297	0.070868	-4.91473	8.89e-07	9.43e-06	1495	1621	1276	1229	1754	1563	1412	1703
1284	ENSMUSG00000033768	Nrxn2	protein_coding	1680.74	0.387105	0.0787895	4.91315	8.96e-07	9.49e-06	2329	2323	1675	1812	1353	1311	1485	1388
1285	ENSMUSG00000036862	Dchs1	protein_coding	2614.68	0.331285	0.0674284	4.91314	8.96e-07	9.49e-06	3869	3118	2561	2899	2208	2282	1928	2431
1286	ENSMUSG00000019944	Rhobtb1	protein_coding	721.558	0.348688	0.0709764	4.91273	8.98e-07	9.5e-06	990	957	712	791	621	633	537	633
1287	ENSMUSG00000051989	Smim11	protein_coding	286.754	-0.559987	0.114072	-4.90905	9.15e-07	9.67e-06	272	283	247	185	331	329	314	328
1288	ENSMUSG00000026037	Orc2	protein_coding	713.15	-0.407341	0.0829845	-4.90864	9.17e-07	9.68e-06	736	791	566	531	787	755	696	869
1289	ENSMUSG00000020883	Fbxl20	protein_coding	1469.06	0.3668	0.0747349	4.90802	9.2e-07	9.7e-06	2265	1782	1544	1495	1227	1355	1059	1262
1290	ENSMUSG00000031320	Rps4x	protein_coding	7761.17	-0.303515	0.0618808	-4.90484	9.35e-07	9.85e-06	8205	8322	6407	6649	8991	7757	8000	7933
1291	ENSMUSG00000047534	Mis18bp1	protein_coding	919.566	-0.349667	0.0713044	-4.90387	9.4e-07	9.9e-06	1065	930	765	703	1077	990	846	1028
1292	ENSMUSG00000021286	Zfyve21	protein_coding	287.054	-0.553547	0.112933	-4.90157	9.51e-07	1e-05	281	244	248	213	350	298	321	331
1293	ENSMUSG00000061175	Fnip2	protein_coding	856.008	0.33099	0.067533	4.90116	9.53e-07	1e-05	1196	1131	844	907	767	737	620	775
1294	ENSMUSG00000032221	Mns1	protein_coding	403.563	-0.730612	0.149088	-4.90054	9.56e-07	1e-05	477	351	267	224	573	561	355	444
1295	ENSMUSG00000041126	H2afv	protein_coding	3312.21	-0.387718	0.0791351	-4.89945	9.61e-07	1.01e-05	3175	3559	2745	2707	3621	3443	3713	3503
1296	ENSMUSG00000022407	Adsl	protein_coding	842.671	-0.355552	0.0725994	-4.89745	9.71e-07	1.02e-05	918	925	658	665	962	854	869	924
1297	ENSMUSG00000020439	Smtn	protein_coding	358.707	-0.480043	0.0980809	-4.89436	9.86e-07	1.03e-05	360	341	282	291	426	377	406	381
1298	ENSMUSG00000021066	Atl1	protein_coding	1062.77	0.346224	0.070742	4.89418	9.87e-07	1.03e-05	1592	1392	1055	1066	876	889	891	910
1299	ENSMUSG00000027778	Ift80	protein_coding	845.024	-0.436174	0.0891191	-4.89429	9.87e-07	1.03e-05	888	849	680	650	1035	960	706	1025
1300	ENSMUSG00000028411	Aptx	protein_coding	684.903	0.365915	0.0747878	4.89271	9.95e-07	1.04e-05	955	915	654	771	603	586	518	578
1301	ENSMUSG00000036867	Smad6	protein_coding	124.926	-0.78218	0.159884	-4.89219	9.97e-07	1.04e-05	90	119	93	87	167	139	133	164
1302	ENSMUSG00000033998	Kcnk1	protein_coding	1026.33	-0.512106	0.104687	-4.8918	9.99e-07	1.04e-05	818	1113	832	813	1250	1160	1045	1150
1303	ENSMUSG00000029838	Ptn	protein_coding	1904.7	0.300721	0.0614899	4.89057	1.01e-06	1.05e-05	2421	2565	1922	2039	1722	1624	1512	1654
1304	ENSMUSG00000027438	Napb	protein_coding	1328.65	0.322097	0.065863	4.89041	1.01e-06	1.05e-05	1809	1819	1343	1341	1089	1126	1060	1230
1305	ENSMUSG00000018899	Irf1	protein_coding	41.8977	-1.27878	0.261571	-4.88886	1.01e-06	1.06e-05	34	22	25	23	57	54	64	50
1306	ENSMUSG00000100252	Mir124-2hg	lincRNA	3573.33	0.461963	0.0945249	4.88721	1.02e-06	1.06e-05	6426	4483	3345	3686	2796	3071	2610	2996
1307	ENSMUSG00000028609	Magoh	protein_coding	1232.34	-0.356497	0.0729507	-4.88682	1.02e-06	1.07e-05	1220	1321	1046	1006	1329	1272	1272	1401
1308	ENSMUSG00000001473	Tubb6	protein_coding	659.302	-1.098	0.224725	-4.88596	1.03e-06	1.07e-05	567	372	302	542	923	738	904	854
1309	ENSMUSG00000037851	Iars	protein_coding	2662.17	-0.263718	0.0539926	-4.88434	1.04e-06	1.08e-05	2933	2881	2229	2277	2942	2740	2418	3003
1310	ENSMUSG00000027654	Fam83d	protein_coding	405.871	-0.455296	0.0933033	-4.87974	1.06e-06	1.1e-05	443	410	315	299	502	409	400	484
1311	ENSMUSG00000021819	Zswim8	protein_coding	2648.66	0.383793	0.0786768	4.8781	1.07e-06	1.11e-05	4338	3127	2611	2809	2337	2303	2013	2119
1312	ENSMUSG00000027935	Rab13	protein_coding	179.653	-0.626407	0.128441	-4.87702	1.08e-06	1.11e-05	171	165	141	125	201	231	175	226
1313	ENSMUSG00000023886	Smoc2	protein_coding	33.9201	2.41495	0.495497	4.8738	1.09e-06	1.13e-05	15	67	87	60	10	10	6	15
1314	ENSMUSG00000022122	Ednrb	protein_coding	593.06	-0.505543	0.103747	-4.87282	1.1e-06	1.14e-05	519	591	492	471	639	618	695	693
1315	ENSMUSG00000062981	Mrpl42	protein_coding	672.654	-0.41984	0.0861686	-4.87231	1.1e-06	1.14e-05	660	729	514	550	767	702	743	719
1316	ENSMUSG00000018169	Mfng	protein_coding	1404.09	0.364632	0.0749562	4.86459	1.15e-06	1.18e-05	1994	1796	1472	1481	1332	1068	1159	1120
1317	ENSMUSG00000024163	Mapk8ip3	protein_coding	3423.58	0.32237	0.0662737	4.86422	1.15e-06	1.18e-05	5324	4154	3210	3651	3000	2984	2655	2976
1318	ENSMUSG00000029186	Pi4k2b	protein_coding	352.989	-0.502473	0.103428	-4.85821	1.18e-06	1.22e-05	371	332	261	284	410	428	307	440
1319	ENSMUSG00000069910	Spdl1	protein_coding	344.126	-0.474546	0.0977113	-4.85661	1.19e-06	1.23e-05	374	357	269	236	384	399	346	400
1320	ENSMUSG00000059013	Sh2d3c	protein_coding	527.268	0.59464	0.122541	4.85258	1.22e-06	1.25e-05	777	779	496	661	413	341	459	382
1321	ENSMUSG00000058546	Rpl23a	protein_coding	2147.78	-0.355787	0.0733326	-4.85169	1.22e-06	1.26e-05	2186	2316	1628	1897	2373	2163	2306	2341
1322	ENSMUSG00000024074	Crim1	protein_coding	833.751	0.405248	0.083549	4.85042	1.23e-06	1.26e-05	1151	1095	854	947	796	679	549	723
1323	ENSMUSG00000027977	Ndst3	protein_coding	494.609	0.501196	0.103345	4.84973	1.24e-06	1.27e-05	803	683	481	530	382	423	310	454
1324	ENSMUSG00000028456	Unc13b	protein_coding	2554.88	0.345375	0.0712719	4.84588	1.26e-06	1.29e-05	3880	3156	2611	2605	2419	2242	1761	2193
1325	ENSMUSG00000029781	Fkbp9	protein_coding	739.809	-0.536067	0.110627	-4.84573	1.26e-06	1.29e-05	585	749	611	600	955	813	710	870
1326	ENSMUSG00000027799	Nbea	protein_coding	4136.96	0.406914	0.0839919	4.84468	1.27e-06	1.3e-05	6109	5445	4249	4381	3368	3738	2597	3930
1327	ENSMUSG00000020185	E2f7	protein_coding	919.939	-0.375054	0.0774197	-4.84442	1.27e-06	1.3e-05	942	986	740	748	1067	1074	822	1010
1328	ENSMUSG00000029802	Abcg2	protein_coding	485.475	-0.413402	0.0853502	-4.8436	1.28e-06	1.3e-05	485	505	400	383	559	497	491	569
1329	ENSMUSG00000001510	Dlx3	protein_coding	103.432	-0.861042	0.177822	-4.84215	1.28e-06	1.31e-05	73	75	81	79	139	116	124	128
1330	ENSMUSG00000016664	Pacsin2	protein_coding	993.65	-0.360004	0.0743615	-4.84127	1.29e-06	1.32e-05	1029	1015	817	841	1176	961	995	1131
1331	ENSMUSG00000030583	Sipa1l3	protein_coding	1720.63	0.357616	0.0738847	4.84019	1.3e-06	1.32e-05	2473	2144	1781	1849	1664	1504	1173	1433
1332	ENSMUSG00000025794	Rpl14	protein_coding	4220.77	-0.23615	0.0488416	-4.83501	1.33e-06	1.36e-05	4807	4554	3512	3673	4571	4223	4213	4397
1333	ENSMUSG00000030397	Mark4	protein_coding	784.01	0.330711	0.0684069	4.83447	1.33e-06	1.36e-05	1134	1024	772	810	682	652	642	673
1334	ENSMUSG00000024589	Nedd4l	protein_coding	1089.84	0.402287	0.0832304	4.83341	1.34e-06	1.37e-05	1644	1418	981	1276	881	924	802	979
1335	ENSMUSG00000035936	Aldh5a1	protein_coding	658.071	-0.413032	0.0854675	-4.83262	1.35e-06	1.37e-05	656	698	541	511	791	701	597	787
1336	ENSMUSG00000049775	Tmsb4x	protein_coding	12946.8	0.209587	0.0433717	4.83235	1.35e-06	1.37e-05	17407	16667	12714	12599	12049	11163	10788	11812
1337	ENSMUSG00000040327	Cul9	protein_coding	756.689	0.392422	0.0812329	4.83083	1.36e-06	1.38e-05	1188	915	763	813	615	640	611	628
1338	ENSMUSG00000027287	Snap23	protein_coding	384.553	-0.482432	0.0999091	-4.82871	1.37e-06	1.39e-05	430	349	286	308	491	430	344	452
1339	ENSMUSG00000031970	Dbndd1	protein_coding	488.717	0.403841	0.0836407	4.82829	1.38e-06	1.4e-05	715	672	481	517	398	398	399	409
1340	ENSMUSG00000031928	Mre11a	protein_coding	832.838	-0.353373	0.0732081	-4.82697	1.39e-06	1.4e-05	851	892	695	677	933	926	768	943
1341	ENSMUSG00000049672	Zbtb14	protein_coding	1192.72	-0.346312	0.0717737	-4.82505	1.4e-06	1.42e-05	1235	1277	904	1061	1392	1252	1115	1344
1342	ENSMUSG00000030695	Aldoa	protein_coding	6561.73	0.429576	0.08907	4.82291	1.41e-06	1.43e-05	9360	8936	6247	7643	5514	4917	5850	4956
1343	ENSMUSG00000024165	Jpt2	protein_coding	3597.15	-0.375966	0.077973	-4.82174	1.42e-06	1.44e-05	3338	3798	2974	3140	4333	3716	3474	4000
1344	ENSMUSG00000028484	Psip1	protein_coding	11209.9	-0.215025	0.0446066	-4.82047	1.43e-06	1.44e-05	12694	12369	9559	9659	11459	11724	10519	12263
1345	ENSMUSG00000021219	Rgs6	protein_coding	729.273	0.480115	0.0996191	4.81951	1.44e-06	1.45e-05	1149	976	743	779	668	475	521	666
1346	ENSMUSG00000028655	Mfsd2a	protein_coding	122.7	0.743059	0.15419	4.81911	1.44e-06	1.45e-05	189	194	119	156	85	92	86	87
1347	ENSMUSG00000029482	Aacs	protein_coding	1682.23	0.328887	0.0682447	4.81923	1.44e-06	1.45e-05	2422	2216	1659	1726	1496	1419	1434	1330
1348	ENSMUSG00000036242	3632451O06Rik	protein_coding	797.061	0.35539	0.0737893	4.81628	1.46e-06	1.47e-05	1146	1048	802	833	737	639	566	734
1349	ENSMUSG00000035152	Ap2b1	protein_coding	6414.84	0.233068	0.0484392	4.81157	1.5e-06	1.51e-05	8543	8403	6005	6683	5892	5589	5160	5874
1350	ENSMUSG00000041216	Clvs1	protein_coding	220.071	0.625711	0.130246	4.80408	1.55e-06	1.56e-05	337	300	242	261	187	178	114	185
1351	ENSMUSG00000039860	Srrm3	protein_coding	931.641	0.437955	0.091192	4.80255	1.57e-06	1.57e-05	1589	1141	884	1006	790	722	712	797
1352	ENSMUSG00000041974	Spidr	protein_coding	625.57	-0.39709	0.0827233	-4.80022	1.58e-06	1.59e-05	628	633	518	517	754	657	574	734
1353	ENSMUSG00000004798	Ulk2	protein_coding	3034.63	0.242482	0.0505362	4.79818	1.6e-06	1.6e-05	3929	3945	3073	3070	2724	2644	2441	2801
1354	ENSMUSG00000027834	Serpini1	protein_coding	700.895	0.485932	0.101371	4.79361	1.64e-06	1.64e-05	1121	1048	687	679	547	645	473	568
1355	ENSMUSG00000024063	Lbh	protein_coding	3429.5	0.303552	0.0633652	4.79051	1.66e-06	1.66e-05	4347	4579	3477	3706	2901	2880	2872	3042
1356	ENSMUSG00000075316	Scn9a	protein_coding	956.175	0.56968	0.118973	4.78833	1.68e-06	1.68e-05	1749	1188	971	1026	756	814	535	849
1357	ENSMUSG00000021983	Atp8a2	protein_coding	490.096	0.632163	0.132062	4.78688	1.69e-06	1.69e-05	715	697	542	584	368	419	237	453
1358	ENSMUSG00000078607	1810010H24Rik	protein_coding	53.9806	-1.09669	0.229126	-4.78642	1.7e-06	1.7e-05	51	39	32	26	73	67	77	63
1359	ENSMUSG00000017999	Ddx27	protein_coding	1056.92	-0.31211	0.0652249	-4.78514	1.71e-06	1.71e-05	1150	1097	892	879	1151	1088	1100	1121
1360	ENSMUSG00000029126	Nsg1	protein_coding	3881.12	0.341847	0.0714512	4.78434	1.72e-06	1.71e-05	5164	5317	3795	4235	3062	3227	3328	3409
1361	ENSMUSG00000032300	1700017B05Rik	protein_coding	261.451	-0.6531	0.136532	-4.78349	1.72e-06	1.72e-05	186	247	207	214	335	301	280	302
1362	ENSMUSG00000024497	Pou4f3	protein_coding	302.494	0.671998	0.140487	4.78334	1.72e-06	1.72e-05	366	480	370	354	199	208	249	229
1363	ENSMUSG00000053604	Rpia	protein_coding	381.222	-0.450718	0.0942508	-4.78211	1.73e-06	1.73e-05	381	371	308	310	401	446	372	461
1364	ENSMUSG00000001472	Tcf25	protein_coding	4872.19	0.255351	0.0534014	4.78173	1.74e-06	1.73e-05	6512	6338	4650	5142	4388	4124	4137	4280
1365	ENSMUSG00000000605	Clcn4	protein_coding	2403.46	0.2914	0.0609442	4.78142	1.74e-06	1.73e-05	3152	3261	2359	2518	2001	2151	1931	2160
1366	ENSMUSG00000038248	Sobp	protein_coding	460.423	0.400281	0.0837169	4.78136	1.74e-06	1.73e-05	678	622	467	477	371	372	359	413
1367	ENSMUSG00000055540	Epha6	protein_coding	343.657	0.76266	0.159529	4.7807	1.75e-06	1.73e-05	652	458	368	389	279	271	143	289
1368	ENSMUSG00000033031	C330027C09Rik	protein_coding	1351.41	-0.357042	0.0746987	-4.77976	1.76e-06	1.74e-05	1468	1382	1113	1094	1510	1449	1179	1673
1369	ENSMUSG00000022761	Lztr1	protein_coding	1679.63	0.259092	0.0542949	4.77194	1.82e-06	1.81e-05	2377	2105	1631	1717	1467	1472	1373	1522
1370	ENSMUSG00000050711	Scg2	protein_coding	138.411	0.779656	0.163428	4.77064	1.84e-06	1.82e-05	198	235	168	146	81	91	100	116
1371	ENSMUSG00000050908	Tvp23a	protein_coding	576.195	0.353757	0.0741847	4.76859	1.86e-06	1.83e-05	797	748	609	602	505	476	459	489
1372	ENSMUSG00000043384	Gprasp1	protein_coding	4868.71	0.258764	0.0542872	4.76657	1.87e-06	1.85e-05	7013	6157	4629	4944	4291	4369	3692	4591
1373	ENSMUSG00000061751	Kalrn	protein_coding	2135.68	0.585	0.122753	4.76568	1.88e-06	1.86e-05	3471	2795	2276	2434	1734	1905	1039	1893
1374	ENSMUSG00000038740	Mvb12b	protein_coding	2610.39	0.342254	0.0718366	4.76434	1.89e-06	1.87e-05	3392	3413	2737	2854	2307	2054	2255	2145
1375	ENSMUSG00000029712	Actl6b	protein_coding	896.321	0.474208	0.0996136	4.76048	1.93e-06	1.9e-05	1468	1220	852	953	644	731	767	710
1376	ENSMUSG00000101797	Gm29266	lincRNA	77.3845	-0.972222	0.204225	-4.76054	1.93e-06	1.9e-05	67	62	41	54	101	106	66	121
1377	ENSMUSG00000024524	Gnal	protein_coding	879.833	0.399149	0.0838671	4.7593	1.94e-06	1.91e-05	1182	1306	918	875	687	732	689	786
1378	ENSMUSG00000028675	Pnrc2	protein_coding	2445.02	-0.30135	0.0633318	-4.75827	1.95e-06	1.92e-05	2693	2710	2086	1880	2761	2547	2265	2745
1379	ENSMUSG00000010529	Gm266	protein_coding	76.7864	-0.962794	0.202378	-4.75741	1.96e-06	1.93e-05	67	60	42	54	114	87	70	119
1380	ENSMUSG00000038648	Creb3l2	protein_coding	188.161	-0.776713	0.163261	-4.7575	1.96e-06	1.93e-05	167	161	138	125	292	243	145	234
1381	ENSMUSG00000032898	Fbxo21	protein_coding	3473.54	0.248991	0.0523434	4.75688	1.97e-06	1.93e-05	4556	4475	3335	3718	3094	2995	2864	3154
1382	ENSMUSG00000029246	Ppat	protein_coding	769.326	-0.425091	0.0893686	-4.75661	1.97e-06	1.93e-05	718	844	626	606	915	863	701	894
1383	ENSMUSG00000032744	Heyl	protein_coding	827.291	-1.43638	0.301982	-4.75651	1.97e-06	1.93e-05	319	585	527	424	847	1059	1306	1368
1384	ENSMUSG00000024782	Ak3	protein_coding	1135.44	-0.294035	0.0618549	-4.75362	2e-06	1.96e-05	1333	1111	944	967	1240	1211	1107	1214
1385	ENSMUSG00000025738	Fbxl16	protein_coding	1430.16	0.320045	0.0673812	4.74976	2.04e-06	1.99e-05	1945	1949	1390	1505	1276	1158	1211	1202
1386	ENSMUSG00000001761	Smo	protein_coding	2696.02	-0.356251	0.0750169	-4.74894	2.04e-06	2e-05	2609	2862	2331	2225	3281	2857	2559	2869
1387	ENSMUSG00000034858	Fam214a	protein_coding	429.803	0.464398	0.0978064	4.74813	2.05e-06	2.01e-05	692	582	435	436	350	392	298	341
1388	ENSMUSG00000046709	Mapk10	protein_coding	894.412	0.405356	0.0853793	4.7477	2.06e-06	2.01e-05	1205	1250	903	988	662	724	736	808
1389	ENSMUSG00000031027	Stk33	protein_coding	256.67	-0.577537	0.121676	-4.74651	2.07e-06	2.02e-05	236	264	209	169	321	295	287	268
1390	ENSMUSG00000031584	Gsr	protein_coding	690.156	-0.450244	0.0948536	-4.74673	2.07e-06	2.02e-05	620	764	512	584	769	741	736	791
1391	ENSMUSG00000046768	Rhoj	protein_coding	148.866	-2.19823	0.463113	-4.74663	2.07e-06	2.02e-05	43	60	68	50	338	295	76	240
1392	ENSMUSG00000041712	Ubr7	protein_coding	1628.68	-0.289342	0.0609971	-4.74354	2.1e-06	2.04e-05	1703	1736	1408	1385	1837	1710	1548	1743
1393	ENSMUSG00000036403	Cep135	protein_coding	532.184	-0.552798	0.116542	-4.74334	2.1e-06	2.04e-05	591	461	420	375	613	679	438	698
1394	ENSMUSG00000041570	Camsap2	protein_coding	3347.51	0.308217	0.0649901	4.74253	2.11e-06	2.05e-05	4475	4538	3347	3458	2844	2943	2420	3232
1395	ENSMUSG00000029475	Kdm2b	protein_coding	1483.53	0.267641	0.0564855	4.73822	2.16e-06	2.09e-05	1965	1928	1459	1561	1374	1282	1174	1309
1396	ENSMUSG00000042744	Hectd4	protein_coding	4732.93	0.42992	0.0907739	4.73616	2.18e-06	2.11e-05	7516	5882	4709	5194	3717	4265	2998	4468
1397	ENSMUSG00000032369	Plscr1	protein_coding	183.671	-0.658788	0.139148	-4.73444	2.2e-06	2.13e-05	161	174	112	159	227	195	219	215
1398	ENSMUSG00000040649	Rimklb	protein_coding	2983.97	0.491014	0.103779	4.73136	2.23e-06	2.16e-05	5610	3661	2832	3033	2348	2534	2135	2455
1399	ENSMUSG00000049811	Fam161a	protein_coding	121.637	-0.762747	0.161248	-4.73027	2.24e-06	2.17e-05	124	92	100	69	146	146	144	147
1400	ENSMUSG00000020108	Ddit4	protein_coding	1570.08	0.450444	0.0952789	4.72764	2.27e-06	2.2e-05	2120	2210	1583	1811	1083	1455	1239	1272
1401	ENSMUSG00000040785	Ttc3	protein_coding	15771.9	0.295852	0.0625807	4.72753	2.27e-06	2.2e-05	21651	20961	15685	16042	14511	13836	10956	14924
1402	ENSMUSG00000025785	Exosc7	protein_coding	560.236	-0.413956	0.087619	-4.7245	2.31e-06	2.23e-05	547	572	497	424	649	605	565	622
1403	ENSMUSG00000020743	Mif4gd	protein_coding	203.266	-0.587523	0.124407	-4.7226	2.33e-06	2.25e-05	206	173	161	151	219	248	237	224
1404	ENSMUSG00000034636	Zyg11b	protein_coding	3133.53	0.359438	0.0761487	4.72022	2.36e-06	2.27e-05	4393	4203	3200	3259	2821	2750	2017	2935
1405	ENSMUSG00000024940	Ltbp3	protein_coding	271.996	-0.646051	0.136932	-4.71806	2.38e-06	2.3e-05	242	278	195	191	371	368	229	305
1406	ENSMUSG00000013698	Pea15a	protein_coding	9808.77	0.300558	0.0637238	4.71658	2.4e-06	2.31e-05	12333	13122	10144	10410	8709	8069	8349	8353
1407	ENSMUSG00000026930	Gpsm1	protein_coding	2510.63	0.310966	0.0659328	4.71641	2.4e-06	2.31e-05	3792	3097	2470	2563	2066	2150	2121	2199
1408	ENSMUSG00000103332	Pcdhga2	protein_coding	209.096	0.566538	0.12016	4.71485	2.42e-06	2.33e-05	323	305	200	243	159	155	160	169
1409	ENSMUSG00000038022	Mindy4	protein_coding	310.292	-0.564613	0.119764	-4.71437	2.42e-06	2.33e-05	268	300	274	217	365	345	357	341
1410	ENSMUSG00000019899	Lama2	protein_coding	112.14	0.816418	0.173212	4.7134	2.44e-06	2.34e-05	171	170	109	160	67	88	68	87
1411	ENSMUSG00000031227	Magee1	protein_coding	1694.09	0.347937	0.0738175	4.71348	2.44e-06	2.34e-05	2235	2367	1739	1754	1331	1394	1401	1553
1412	ENSMUSG00000021700	Rab3c	protein_coding	1386.62	0.348778	0.0740223	4.7118	2.46e-06	2.36e-05	2018	1954	1383	1323	1166	1110	1090	1291
1413	ENSMUSG00000028322	Exosc3	protein_coding	552.17	-0.456653	0.0969745	-4.70901	2.49e-06	2.39e-05	507	577	467	424	601	572	608	651
1414	ENSMUSG00000036052	Dnajb5	protein_coding	737.32	0.519748	0.110402	4.70779	2.5e-06	2.4e-05	1326	975	690	772	537	599	599	571
1415	ENSMUSG00000044707	Ccnjl	protein_coding	423.681	-0.474198	0.100739	-4.7072	2.51e-06	2.4e-05	406	459	322	327	537	427	413	507
1416	ENSMUSG00000079111	Kdelr2	protein_coding	862.578	-0.326364	0.0693396	-4.70675	2.52e-06	2.41e-05	923	935	677	733	994	902	857	909
1417	ENSMUSG00000050069	Grem2	protein_coding	49.6387	1.13115	0.240369	4.7059	2.53e-06	2.42e-05	102	85	53	56	29	27	31	32
1418	ENSMUSG00000050357	Carmil2	protein_coding	240.18	0.620035	0.131808	4.70407	2.55e-06	2.44e-05	373	358	233	284	190	154	204	172
1419	ENSMUSG00000030189	Ybx3	protein_coding	1659.82	-0.345838	0.0735272	-4.70354	2.56e-06	2.44e-05	1633	1792	1381	1403	1922	1681	1719	1759
1420	ENSMUSG00000046330	Rpl37a	protein_coding	2376.24	-0.306911	0.0652559	-4.70319	2.56e-06	2.44e-05	2580	2607	1967	1920	2527	2390	2535	2554
1421	ENSMUSG00000060671	Atp8b2	protein_coding	1289.86	0.357908	0.0761457	4.70031	2.6e-06	2.48e-05	1881	1548	1268	1483	1104	1138	909	1172
1422	ENSMUSG00000056073	Grik2	protein_coding	470.664	0.486542	0.10355	4.69863	2.62e-06	2.5e-05	824	633	454	467	394	377	340	388
1423	ENSMUSG00000074682	Zcchc3	protein_coding	1002.78	-0.385084	0.0819897	-4.69674	2.64e-06	2.52e-05	986	1047	820	842	1196	959	1015	1165
1424	ENSMUSG00000026283	Ing5	protein_coding	677.367	-0.343664	0.0731865	-4.69574	2.66e-06	2.53e-05	762	658	541	586	788	733	639	734
1425	ENSMUSG00000022471	Xrcc6	protein_coding	481.58	-0.411806	0.0877084	-4.69517	2.66e-06	2.53e-05	487	477	413	380	589	499	473	538
1426	ENSMUSG00000038855	Itpkb	protein_coding	504.359	0.528743	0.112645	4.69388	2.68e-06	2.55e-05	628	695	595	597	449	423	300	409
1427	ENSMUSG00000032050	Rdx	protein_coding	4331.62	-0.291377	0.0620854	-4.69317	2.69e-06	2.55e-05	4660	4802	3504	3666	4898	4599	3799	4948
1428	ENSMUSG00000022769	Sdf2l1	protein_coding	302.262	-0.522445	0.111334	-4.6926	2.7e-06	2.56e-05	294	319	201	247	354	305	336	364
1429	ENSMUSG00000019877	Serinc1	protein_coding	6733.04	0.227784	0.0485453	4.6922	2.7e-06	2.56e-05	8842	8891	6451	6852	6009	5870	5520	6267
1430	ENSMUSG00000029414	Kntc1	protein_coding	1094.86	-0.464853	0.0990891	-4.69127	2.72e-06	2.57e-05	1226	1009	826	875	1271	1415	895	1287
1431	ENSMUSG00000025128	Bhlhe22	protein_coding	643.773	0.493949	0.105365	4.68798	2.76e-06	2.61e-05	827	1025	684	678	557	444	473	568
1432	ENSMUSG00000050050	Ccdc158	protein_coding	74.1163	-0.899472	0.192245	-4.67879	2.89e-06	2.73e-05	54	69	53	44	98	86	86	98
1433	ENSMUSG00000040896	Kcnd3	protein_coding	1705.3	0.373991	0.0799373	4.67855	2.89e-06	2.73e-05	2572	2219	1643	1826	1544	1503	1103	1543
1434	ENSMUSG00000019528	Gyg	protein_coding	339.469	-0.589862	0.126179	-4.67481	2.94e-06	2.78e-05	296	332	282	239	433	362	415	340
1435	ENSMUSG00000020099	Unc5b	protein_coding	618.842	1.42684	0.30527	4.67402	2.95e-06	2.79e-05	1081	808	960	941	506	308	172	311
1436	ENSMUSG00000027500	Stmn2	protein_coding	14780.9	0.324496	0.0694293	4.67376	2.96e-06	2.79e-05	20254	19859	14629	15500	12313	11521	13116	12971
1437	ENSMUSG00000020593	Lpin1	protein_coding	421.7	0.457849	0.0979649	4.6736	2.96e-06	2.79e-05	588	619	425	456	316	379	298	364
1438	ENSMUSG00000045689	Pcdhb4	protein_coding	87.1538	0.828117	0.177281	4.67121	2.99e-06	2.82e-05	151	130	89	109	59	54	57	70
1439	ENSMUSG00000068101	Cenpm	protein_coding	285.318	-0.614564	0.131567	-4.67112	3e-06	2.82e-05	257	291	228	185	383	307	338	286
1440	ENSMUSG00000055761	Nkain3	protein_coding	283.175	0.75723	0.162145	4.67008	3.01e-06	2.83e-05	474	447	299	314	208	215	119	269
1441	ENSMUSG00000026074	Map4k4	protein_coding	8768.35	0.241055	0.0516286	4.66902	3.03e-06	2.85e-05	11640	11108	8633	9126	7792	7961	6606	8364
1442	ENSMUSG00000005357	Slc1a6	protein_coding	315.348	-0.547464	0.117295	-4.66741	3.05e-06	2.87e-05	270	306	276	231	342	349	350	384
1443	ENSMUSG00000025272	Tro	protein_coding	2074.59	0.287233	0.0615665	4.66541	3.08e-06	2.89e-05	2992	2557	1975	2232	1872	1797	1538	1938
1444	ENSMUSG00000034377	Tulp4	protein_coding	6949.38	0.360732	0.0773442	4.66398	3.1e-06	2.91e-05	9752	9242	7132	7258	5902	6364	4488	6562
1445	ENSMUSG00000036989	Trim3	protein_coding	743.334	0.422537	0.0906833	4.65947	3.17e-06	2.97e-05	1255	908	720	784	619	614	577	614
1446	ENSMUSG00000057388	Mrpl18	protein_coding	653.903	-0.352864	0.0757384	-4.65898	3.18e-06	2.98e-05	691	647	530	574	693	719	671	711
1447	ENSMUSG00000010048	Ifrd2	protein_coding	256.331	-0.513566	0.110238	-4.65872	3.18e-06	2.98e-05	264	235	206	195	334	265	254	299
1448	ENSMUSG00000044224	Dnajc21	protein_coding	584.284	-0.372453	0.07996	-4.65799	3.19e-06	2.99e-05	602	640	462	471	668	642	544	666
1449	ENSMUSG00000025508	Rplp2	protein_coding	3671.94	-0.290821	0.0624473	-4.65706	3.21e-06	3e-05	3940	3934	3008	3189	4028	3529	3804	4038
1450	ENSMUSG00000022639	Dubr	lincRNA	532.099	0.377097	0.0809988	4.65559	3.23e-06	3.02e-05	766	729	527	554	448	427	399	495
1451	ENSMUSG00000042873	Lhfpl4	protein_coding	1927.17	0.307012	0.0659739	4.65353	3.26e-06	3.05e-05	2424	2583	1989	2062	1627	1625	1564	1752
1452	ENSMUSG00000038518	Jarid2	protein_coding	1122.19	0.287868	0.0618822	4.65188	3.29e-06	3.07e-05	1551	1492	1077	1161	1012	979	851	1020
1453	ENSMUSG00000047045	Tmem164	protein_coding	1959.27	-0.268563	0.0577401	-4.65123	3.3e-06	3.08e-05	2127	2090	1643	1710	2252	1996	1813	2119
1454	ENSMUSG00000027210	Meis2	protein_coding	1284.42	0.454162	0.0976807	4.64945	3.33e-06	3.1e-05	1530	1972	1459	1340	993	1058	993	1086
1455	ENSMUSG00000021466	Ptch1	protein_coding	2023.2	-0.312614	0.0672487	-4.64862	3.34e-06	3.11e-05	2108	2236	1604	1748	2216	2230	1813	2312
1456	ENSMUSG00000026687	Aldh9a1	protein_coding	721.796	-0.358486	0.0772006	-4.64356	3.42e-06	3.19e-05	752	756	589	598	871	732	729	762
1457	ENSMUSG00000026675	Hsd17b7	protein_coding	842.208	0.311231	0.0670301	4.64316	3.43e-06	3.19e-05	1219	1067	838	868	781	729	630	733
1458	ENSMUSG00000038351	Sgsm2	protein_coding	1067.75	0.373408	0.0804314	4.64256	3.44e-06	3.2e-05	1698	1294	1031	1150	947	840	866	895
1459	ENSMUSG00000060639	Hist1h4i	protein_coding	160.032	-0.677594	0.14598	-4.6417	3.46e-06	3.21e-05	140	128	121	131	181	166	197	204
1460	ENSMUSG00000021112	Mpp5	protein_coding	805.557	-0.393177	0.0847408	-4.63975	3.49e-06	3.24e-05	822	853	649	646	876	938	706	980
1461	ENSMUSG00000071647	Eml3	protein_coding	414.451	-0.422031	0.0909775	-4.63885	3.5e-06	3.25e-05	465	380	347	320	480	475	387	472
1462	ENSMUSG00000032228	Tcf12	protein_coding	5105.32	0.317202	0.06839	4.63814	3.52e-06	3.26e-05	6836	6743	4951	5626	4783	4547	3510	4567
1463	ENSMUSG00000008668	Rps18	protein_coding	3731.72	-0.271109	0.0584774	-4.63613	3.55e-06	3.29e-05	4018	3935	3091	3342	4000	3787	3850	3908
1464	ENSMUSG00000028194	Ddah1	protein_coding	1066.55	0.419931	0.0905848	4.63578	3.56e-06	3.29e-05	1330	1583	1121	1158	835	855	894	887
1465	ENSMUSG00000057236	Rbbp4	protein_coding	7211.3	-0.205354	0.0443258	-4.63283	3.61e-06	3.33e-05	8167	8101	6094	6243	7829	7372	6800	7477
1466	ENSMUSG00000029675	Eln	protein_coding	77.6607	-0.911175	0.196787	-4.63025	3.65e-06	3.37e-05	57	63	62	46	88	112	87	99
1467	ENSMUSG00000015749	Anp32e	protein_coding	7736.05	-0.294978	0.0637118	-4.62989	3.66e-06	3.38e-05	7906	8524	6547	6567	8001	8116	7385	9041
1468	ENSMUSG00000028081	Rps3a1	protein_coding	5915.5	-0.226834	0.0490312	-4.62633	3.72e-06	3.43e-05	6591	6571	4997	5100	6488	6111	5731	6003
1469	ENSMUSG00000027597	Ahcy	protein_coding	680.83	-0.418639	0.0905299	-4.62432	3.76e-06	3.46e-05	634	697	538	600	800	683	722	763
1470	ENSMUSG00000043940	Wdfy3	protein_coding	5631.64	0.496388	0.107465	4.61907	3.85e-06	3.55e-05	8598	7453	5869	6273	4850	4937	2980	5195
1471	ENSMUSG00000029333	NA	NA	1148.21	0.320984	0.0695015	4.61837	3.87e-06	3.56e-05	1655	1536	1138	1141	953	1001	857	1091
1472	ENSMUSG00000016028	Celsr1	protein_coding	307.395	-0.599939	0.129973	-4.61588	3.91e-06	3.6e-05	300	250	264	222	435	365	270	349
1473	ENSMUSG00000063632	Sox11	protein_coding	9507.14	0.28207	0.0611486	4.61287	3.97e-06	3.65e-05	14585	11489	9155	9588	8153	8436	7735	8395
1474	ENSMUSG00000026923	Notch1	protein_coding	5153.28	-0.298329	0.0647183	-4.60965	4.03e-06	3.71e-05	5460	5476	4283	4453	5561	5862	4484	5837
1475	ENSMUSG00000024014	Pim1	protein_coding	618.308	-0.451136	0.0978891	-4.60865	4.05e-06	3.72e-05	544	645	488	534	664	660	662	734
1476	ENSMUSG00000038602	Slc35f1	protein_coding	1117.95	-0.408716	0.0887318	-4.60619	4.1e-06	3.76e-05	1085	1295	857	869	1201	1210	1075	1387
1477	ENSMUSG00000026447	Pik3c2b	protein_coding	784.355	0.438091	0.0951188	4.60572	4.11e-06	3.77e-05	1309	961	768	845	687	609	530	725
1478	ENSMUSG00000000531	Grasp	protein_coding	154.96	-0.757825	0.164557	-4.60525	4.12e-06	3.77e-05	133	108	112	132	219	152	187	183
1479	ENSMUSG00000043279	Trim56	protein_coding	308.29	-0.628883	0.136555	-4.60533	4.12e-06	3.77e-05	288	272	242	227	374	373	244	447
1480	ENSMUSG00000090733	Rps27	protein_coding	2923.1	-0.350125	0.0760305	-4.60507	4.12e-06	3.77e-05	2955	3015	2314	2629	3136	2845	3159	3334
1481	ENSMUSG00000036249	Rbm43	protein_coding	56.5794	-0.983472	0.213659	-4.603	4.16e-06	3.81e-05	49	48	36	30	81	66	69	71
1482	ENSMUSG00000020521	Rnft1	protein_coding	287.722	-0.470264	0.102228	-4.60013	4.22e-06	3.86e-05	319	272	232	209	312	338	288	338
1483	ENSMUSG00000025266	Gnl3l	protein_coding	2027.83	0.263454	0.0572911	4.59851	4.26e-06	3.89e-05	2724	2680	2002	2050	1805	1794	1526	1920
1484	ENSMUSG00000022512	Cldn1	protein_coding	155.926	-2.54596	0.553765	-4.59754	4.28e-06	3.9e-05	27	54	66	40	390	319	74	252
1485	ENSMUSG00000028496	Mllt3	protein_coding	963.777	0.362078	0.0787623	4.5971	4.28e-06	3.91e-05	1352	1369	953	975	884	819	655	872
1486	ENSMUSG00000038264	Sema7a	protein_coding	434.776	0.48164	0.104825	4.59469	4.33e-06	3.95e-05	570	638	480	468	321	322	336	404
1487	ENSMUSG00000048108	Tmem72	protein_coding	1697.91	0.489544	0.106566	4.5938	4.35e-06	3.96e-05	2989	2029	1771	1755	1320	1508	1050	1533
1488	ENSMUSG00000035547	Capn5	protein_coding	250.235	0.523608	0.114006	4.5928	4.37e-06	3.98e-05	387	348	235	296	223	186	176	200
1489	ENSMUSG00000034586	Hid1	protein_coding	597.006	0.404204	0.0880297	4.59168	4.4e-06	4e-05	916	827	561	622	476	476	494	513
1490	ENSMUSG00000045328	Cenpe	protein_coding	2177.64	-0.34846	0.0758946	-4.59137	4.4e-06	4e-05	2275	2271	1826	1785	2392	2495	1852	2601
1491	ENSMUSG00000062380	Tubb3	protein_coding	27956.4	0.336111	0.0732264	4.59002	4.43e-06	4.03e-05	37007	37450	27883	30575	24515	21317	24748	23426
1492	ENSMUSG00000030465	Psd3	protein_coding	1305.28	0.447272	0.0974868	4.58802	4.47e-06	4.06e-05	1917	1733	1367	1419	1166	1188	749	1136
1493	ENSMUSG00000027884	Clcc1	protein_coding	646.943	-0.360341	0.0785656	-4.5865	4.51e-06	4.09e-05	760	645	532	491	705	732	605	738
1494	ENSMUSG00000043668	Tox3	protein_coding	1464.31	0.388448	0.0847351	4.58426	4.56e-06	4.13e-05	1991	2084	1450	1571	1117	1124	1231	1357
1495	ENSMUSG00000036155	Mgat5	protein_coding	1510.41	0.337183	0.0735875	4.58206	4.6e-06	4.17e-05	1981	2070	1578	1558	1254	1290	1093	1465
1496	ENSMUSG00000003559	As3mt	protein_coding	395.077	-0.45614	0.0995818	-4.58056	4.64e-06	4.2e-05	389	440	302	294	425	452	386	483
1497	ENSMUSG00000035413	Tmem98	protein_coding	813.923	-0.379985	0.0829655	-4.58004	4.65e-06	4.21e-05	804	883	648	676	931	825	884	865
1498	ENSMUSG00000036026	Tmem63b	protein_coding	2056.75	0.345268	0.0754227	4.57777	4.7e-06	4.25e-05	3175	2529	1983	2187	1789	1623	1770	1716
1499	ENSMUSG00000052512	Nav2	protein_coding	1344.17	0.39381	0.0861419	4.57164	4.84e-06	4.37e-05	2169	1655	1281	1457	1067	1157	954	1264
1500	ENSMUSG00000022661	Cd200	protein_coding	1208.72	0.339145	0.0741918	4.5712	4.85e-06	4.38e-05	1590	1690	1241	1240	998	963	1004	1102
1501	ENSMUSG00000041670	Rims1	protein_coding	420.252	0.428892	0.0938524	4.56985	4.88e-06	4.4e-05	609	609	443	408	372	323	303	372
1502	ENSMUSG00000078773	Rad54b	protein_coding	335.811	-0.463156	0.101349	-4.56989	4.88e-06	4.4e-05	380	307	258	263	355	411	323	398
1503	ENSMUSG00000058388	Phtf1	protein_coding	1210.7	-0.285862	0.062563	-4.56919	4.9e-06	4.41e-05	1346	1270	1040	998	1388	1221	1133	1340
1504	ENSMUSG00000023017	Asic1	protein_coding	371.85	0.459725	0.100625	4.56869	4.91e-06	4.42e-05	583	474	354	434	321	275	277	323
1505	ENSMUSG00000044155	Lsm8	protein_coding	1001.16	-0.307788	0.0673844	-4.56764	4.93e-06	4.44e-05	1061	1043	855	847	1067	1018	1017	1119
1506	ENSMUSG00000047675	Rps8	protein_coding	4454.55	-0.275007	0.0602171	-4.56693	4.95e-06	4.45e-05	4733	4785	3730	3902	4923	4310	4520	4843
1507	ENSMUSG00000033722	BC034090	protein_coding	420.811	-0.491801	0.107706	-4.56614	4.97e-06	4.47e-05	452	401	310	333	555	384	433	508
1508	ENSMUSG00000026156	B3gat2	protein_coding	342.94	0.43507	0.0953266	4.564	5.02e-06	4.51e-05	524	463	328	377	303	275	248	289
1509	ENSMUSG00000032492	Pth1r	protein_coding	329.315	-0.589747	0.129278	-4.56183	5.07e-06	4.55e-05	245	318	267	275	404	347	354	403
1510	ENSMUSG00000039166	Akap7	protein_coding	1578.54	0.292067	0.0640492	4.56004	5.11e-06	4.59e-05	2228	2076	1552	1586	1283	1418	1301	1408
1511	ENSMUSG00000059447	Hadhb	protein_coding	544.127	-0.402979	0.088423	-4.55741	5.18e-06	4.64e-05	564	564	444	427	694	589	518	567
1512	ENSMUSG00000062866	Phactr2	protein_coding	1091.84	-0.435335	0.0955424	-4.55646	5.2e-06	4.66e-05	1113	1064	883	889	1218	1360	894	1339
1513	ENSMUSG00000033004	Mycbp2	protein_coding	5020.78	0.472646	0.103753	4.5555	5.23e-06	4.68e-05	7616	6674	5162	5527	4005	4629	2808	4703
1514	ENSMUSG00000035847	Ids	protein_coding	2433.56	0.265974	0.0584423	4.55105	5.34e-06	4.78e-05	3423	3221	2353	2397	2045	2200	1963	2223
1515	ENSMUSG00000032902	Slc16a1	protein_coding	691.282	-0.591184	0.12998	-4.54828	5.41e-06	4.84e-05	537	673	558	555	969	814	574	832
1516	ENSMUSG00000024981	Acsl5	protein_coding	375.432	-0.442604	0.0973198	-4.54793	5.42e-06	4.84e-05	379	415	278	290	409	397	398	446
1517	ENSMUSG00000028378	Ptgr1	protein_coding	169.026	-0.613042	0.134806	-4.5476	5.43e-06	4.85e-05	142	153	139	131	211	202	165	202
1518	ENSMUSG00000031709	Tbc1d9	protein_coding	2031.22	0.259628	0.0570993	4.54696	5.44e-06	4.86e-05	2733	2440	2133	2109	1843	1833	1560	1824
1519	ENSMUSG00000022425	Enpp2	protein_coding	151.29	0.827715	0.1821	4.54537	5.48e-06	4.89e-05	230	243	161	192	79	98	137	98
1520	ENSMUSG00000056870	Gulp1	protein_coding	423.962	-0.416893	0.0917463	-4.54398	5.52e-06	4.92e-05	425	439	349	334	514	470	385	485
1521	ENSMUSG00000037628	Cdkn3	protein_coding	123.083	-0.737911	0.162415	-4.54338	5.54e-06	4.93e-05	111	110	102	70	164	144	146	132
1522	ENSMUSG00000039982	Dtx4	protein_coding	4418.25	-0.400629	0.0882124	-4.54165	5.58e-06	4.97e-05	4569	4808	3150	3764	5387	4022	4474	5324
1523	ENSMUSG00000044408	Sptssa	protein_coding	1699.89	-0.344587	0.0758928	-4.54045	5.61e-06	5e-05	1728	1920	1408	1334	1778	1805	1816	1842
1524	ENSMUSG00000030729	Pgm2l1	protein_coding	2369.18	0.373922	0.0824087	4.53741	5.7e-06	5.06e-05	3505	3235	2348	2397	1939	2165	1555	2245
1525	ENSMUSG00000046607	Hrk	protein_coding	297.603	0.748425	0.164998	4.53596	5.73e-06	5.1e-05	358	479	367	369	155	210	246	230
1526	ENSMUSG00000001924	Uba1	protein_coding	10282.7	0.22964	0.0506307	4.53558	5.74e-06	5.1e-05	13804	12952	9634	10996	9715	8739	8437	9233
1527	ENSMUSG00000031398	Plxna3	protein_coding	2907.93	0.53079	0.117077	4.53367	5.8e-06	5.15e-05	5775	3465	2768	2947	2374	2458	1991	2266
1528	ENSMUSG00000027546	Atp9a	protein_coding	3336.9	0.379664	0.0838268	4.52915	5.92e-06	5.25e-05	4325	4608	3449	3668	2683	2607	3004	2722
1529	ENSMUSG00000029386	Tctn2	processed_transcript	492.337	-0.474695	0.104826	-4.5284	5.94e-06	5.27e-05	487	455	427	378	609	515	562	492
1530	ENSMUSG00000062867	Impdh2	protein_coding	1089.01	-0.34179	0.0754905	-4.52759	5.97e-06	5.29e-05	1086	1138	917	936	1309	1116	1067	1154
1531	ENSMUSG00000049866	Arl4c	protein_coding	1278.22	0.357043	0.0788758	4.52665	5.99e-06	5.31e-05	1662	1800	1269	1389	1007	1072	1080	1107
1532	ENSMUSG00000021318	Gli3	protein_coding	948.293	-0.449491	0.0993212	-4.52563	6.02e-06	5.32e-05	971	883	688	866	1148	1190	821	1032
1533	ENSMUSG00000045871	Slitrk6	protein_coding	319.529	0.513546	0.113475	4.52562	6.02e-06	5.32e-05	500	484	334	302	236	279	225	266
1534	ENSMUSG00000037784	Dzip1l	protein_coding	433.922	-0.452292	0.0999942	-4.52318	6.09e-06	5.38e-05	428	404	372	350	552	474	389	503
1535	ENSMUSG00000028394	Pole3	protein_coding	1473.66	-0.31135	0.0688511	-4.52208	6.12e-06	5.41e-05	1492	1569	1273	1250	1551	1523	1475	1673
1536	ENSMUSG00000022246	Rai14	protein_coding	1892.64	0.287256	0.0635578	4.5196	6.2e-06	5.46e-05	2519	2600	1904	1872	1789	1667	1454	1602
1537	ENSMUSG00000041164	Zmiz2	protein_coding	3282.21	0.25701	0.0568659	4.51958	6.2e-06	5.46e-05	4442	4246	3179	3401	3057	2701	2797	2844
1538	ENSMUSG00000020973	Dnaaf2	protein_coding	448.96	-0.46997	0.103996	-4.51911	6.21e-06	5.47e-05	436	461	338	368	557	435	514	479
1539	ENSMUSG00000041729	Coro2b	protein_coding	2610.91	0.330909	0.0732241	4.51912	6.21e-06	5.47e-05	3950	3190	2377	2950	2319	2226	2106	2168
1540	ENSMUSG00000044986	Tst	protein_coding	51.7557	-1.10241	0.244184	-4.51468	6.34e-06	5.58e-05	31	43	35	30	70	76	69	53
1541	ENSMUSG00000024968	Rcor2	protein_coding	4179.63	0.268162	0.059405	4.51414	6.36e-06	5.59e-05	5999	4996	4117	4398	3890	3574	3505	3486
1542	ENSMUSG00000035580	Kcnh8	protein_coding	225.546	0.548517	0.121515	4.51399	6.36e-06	5.59e-05	349	320	212	268	174	197	163	165
1543	ENSMUSG00000020288	Ahsa2	protein_coding	724.383	0.329433	0.0730074	4.51232	6.41e-06	5.63e-05	1077	918	704	758	633	585	577	656
1544	ENSMUSG00000051768	Xrcc1	protein_coding	1095.53	-0.313235	0.0694443	-4.51059	6.46e-06	5.68e-05	1253	1109	892	919	1240	1150	1144	1091
1545	ENSMUSG00000035671	Zswim4	protein_coding	2030.3	0.266425	0.0591095	4.50731	6.57e-06	5.76e-05	2663	2718	1976	2108	1864	1704	1690	1771
1546	ENSMUSG00000040152	Thbs1	protein_coding	116.333	0.873609	0.193961	4.50405	6.67e-06	5.85e-05	155	204	113	168	71	92	83	66
1547	ENSMUSG00000061613	U2af1	protein_coding	1337.96	-0.34299	0.0761875	-4.50192	6.73e-06	5.9e-05	1453	1409	1154	1019	1353	1387	1423	1535
1548	ENSMUSG00000037692	Ahdc1	protein_coding	1021.67	0.343369	0.0762776	4.50157	6.75e-06	5.91e-05	1286	1366	1090	1107	880	806	835	911
1549	ENSMUSG00000050822	Slc29a4	protein_coding	1196.45	0.372199	0.0826857	4.50137	6.75e-06	5.91e-05	1642	1624	1235	1259	946	951	1074	992
1550	ENSMUSG00000042688	Mapk6	protein_coding	5053.07	0.22845	0.0507613	4.50047	6.78e-06	5.93e-05	6651	6479	4873	5262	4797	4429	3865	4699
1551	ENSMUSG00000002985	Apoe	protein_coding	989.712	-0.50432	0.112129	-4.49768	6.87e-06	6.01e-05	990	804	856	807	1205	1295	841	1105
1552	ENSMUSG00000020393	Kremen1	protein_coding	987.962	-0.355199	0.0789766	-4.49752	6.88e-06	6.01e-05	943	1076	840	820	1125	1046	981	1078
1553	ENSMUSG00000038909	Kat7	protein_coding	1674.98	-0.262539	0.0583849	-4.49669	6.9e-06	6.03e-05	1798	1764	1416	1497	1826	1741	1641	1758
1554	ENSMUSG00000035365	Parpbp	protein_coding	258.785	-0.501111	0.111471	-4.49542	6.94e-06	6.06e-05	272	248	198	198	296	318	229	318
1555	ENSMUSG00000026039	Sgo2a	protein_coding	376.054	-0.427509	0.095129	-4.494	6.99e-06	6.1e-05	368	364	304	325	446	429	353	419
1556	ENSMUSG00000052798	Nup107	protein_coding	1153.93	-0.266673	0.0593463	-4.4935	7.01e-06	6.11e-05	1276	1193	984	1007	1243	1191	1109	1265
1557	ENSMUSG00000016534	Lamp2	protein_coding	1375.38	-0.327797	0.0729844	-4.49132	7.08e-06	6.16e-05	1428	1520	1136	1119	1621	1436	1227	1574
1558	ENSMUSG00000038533	Cbfa2t2	protein_coding	2067.73	0.284832	0.0634294	4.49054	7.1e-06	6.18e-05	2795	2673	2053	2172	1883	1831	1465	1955
1559	ENSMUSG00000020864	Ankrd40	protein_coding	2258.64	-0.277023	0.061699	-4.48992	7.13e-06	6.2e-05	2351	2482	1926	1929	2458	2383	2257	2335
1560	ENSMUSG00000026646	Suv39h2	protein_coding	560.693	-0.372875	0.08306	-4.48922	7.15e-06	6.21e-05	558	585	467	467	622	580	546	667
1561	ENSMUSG00000024793	Tnfrsf25	protein_coding	47.4584	-1.27988	0.285276	-4.48646	7.24e-06	6.29e-05	52	22	22	24	52	65	77	61
1562	ENSMUSG00000031628	Casp3	protein_coding	1678.85	0.274343	0.0611924	4.48328	7.35e-06	6.38e-05	2233	2280	1613	1733	1498	1502	1270	1537
1563	ENSMUSG00000022912	Pros1	protein_coding	254.447	-0.538352	0.120093	-4.48278	7.37e-06	6.39e-05	241	256	182	206	306	324	221	303
1564	ENSMUSG00000028661	Epha8	protein_coding	1422.63	0.440274	0.0982213	4.48247	7.38e-06	6.4e-05	2312	1885	1508	1349	1011	1305	1135	1144
1565	ENSMUSG00000031934	Panx1	protein_coding	1310.11	0.282389	0.0630487	4.47891	7.5e-06	6.5e-05	1728	1783	1289	1342	1195	1131	1064	1120
1566	ENSMUSG00000096883	Shisa8	protein_coding	37.6933	1.20558	0.269306	4.47663	7.58e-06	6.57e-05	59	68	54	43	26	21	20	20
1567	ENSMUSG00000028587	Orc1	protein_coding	120.573	-0.745416	0.166587	-4.47463	7.65e-06	6.62e-05	129	91	86	80	147	177	114	140
1568	ENSMUSG00000019927	Ube2d1	protein_coding	2117.03	0.282849	0.0632349	4.47299	7.71e-06	6.67e-05	2871	2927	2031	2126	1894	1776	1784	1827
1569	ENSMUSG00000022698	Naa50	protein_coding	2498.78	-0.350103	0.0782804	-4.47242	7.73e-06	6.69e-05	2404	2778	2087	2066	2763	2711	2256	2981
1570	ENSMUSG00000024844	Banf1	protein_coding	1787.45	-0.398025	0.0889979	-4.47229	7.74e-06	6.69e-05	1694	1945	1436	1479	2042	1673	1960	2067
1571	ENSMUSG00000019731	Slc35e1	protein_coding	1078.99	-0.322166	0.0720573	-4.47097	7.79e-06	6.72e-05	1072	1133	925	937	1216	1163	1024	1173
1572	ENSMUSG00000048922	Cdca2	protein_coding	1017.54	-0.313617	0.0701623	-4.46988	7.83e-06	6.75e-05	1142	1044	861	827	1176	1081	895	1163
1573	ENSMUSG00000007815	Rhoa	protein_coding	3238.87	-0.233592	0.0522731	-4.46868	7.87e-06	6.78e-05	3570	3484	2748	2875	3607	3208	3053	3497
1574	ENSMUSG00000059602	Syn3	protein_coding	157.19	0.7355	0.16461	4.46814	7.89e-06	6.79e-05	255	229	170	188	130	115	68	141
1575	ENSMUSG00000021697	Depdc1b	protein_coding	450.564	-0.62981	0.140994	-4.46692	7.94e-06	6.83e-05	347	479	323	350	467	555	588	464
1576	ENSMUSG00000050064	Zfp697	protein_coding	426.881	0.401199	0.0898218	4.46661	7.95e-06	6.84e-05	560	592	435	481	353	343	329	378
1577	ENSMUSG00000079499	6530402F18Rik	processed_transcript	322.7	0.535017	0.119838	4.46451	8.03e-06	6.9e-05	434	501	378	317	263	252	201	293
1578	ENSMUSG00000031778	Cx3cl1	protein_coding	83.5268	0.881744	0.197517	4.46413	8.04e-06	6.91e-05	118	139	101	102	54	43	67	59
1579	ENSMUSG00000066894	Vsig10	protein_coding	100.937	-0.90989	0.203886	-4.46273	8.09e-06	6.95e-05	61	71	75	85	148	106	113	135
1580	ENSMUSG00000021932	Rnaseh2b	protein_coding	434.799	-0.467959	0.104874	-4.46211	8.12e-06	6.96e-05	433	465	356	305	518	541	426	442
1581	ENSMUSG00000023966	Rsph9	protein_coding	164.475	-0.623619	0.139786	-4.46122	8.15e-06	6.99e-05	160	164	120	110	182	170	204	203
1582	ENSMUSG00000031274	Col4a5	protein_coding	963.572	-0.458161	0.102712	-4.46062	8.17e-06	7e-05	1035	924	699	811	1317	1092	793	1078
1583	ENSMUSG00000052727	Map1b	protein_coding	24527.7	0.38748	0.0868758	4.46016	8.19e-06	7.01e-05	36972	31466	23935	26750	20892	21784	15191	23650
1584	ENSMUSG00000020167	Tcf3	protein_coding	3204.15	-0.305034	0.0684217	-4.45815	8.27e-06	7.08e-05	3385	3329	2697	2775	3871	3189	3204	3247
1585	ENSMUSG00000021143	Pacs2	protein_coding	3371.49	0.24049	0.0539668	4.45626	8.34e-06	7.13e-05	4461	4310	3291	3514	3159	2894	2844	2887
1586	ENSMUSG00000032086	Bace1	protein_coding	1543.15	0.287747	0.0645707	4.45631	8.34e-06	7.13e-05	2082	1996	1527	1634	1365	1438	1115	1395
1587	ENSMUSG00000047085	Lrrc4b	protein_coding	1192.84	0.446157	0.100124	4.45604	8.35e-06	7.13e-05	1608	1638	1233	1373	987	815	1077	956
1588	ENSMUSG00000015501	Hivep2	protein_coding	421.037	0.431379	0.0968711	4.45312	8.46e-06	7.23e-05	595	588	453	431	341	377	274	380
1589	ENSMUSG00000031358	Msl3	protein_coding	616.317	-0.364365	0.081853	-4.45145	8.53e-06	7.28e-05	625	630	498	538	713	678	554	707
1590	ENSMUSG00000022044	Stmn4	protein_coding	3048.61	0.449248	0.100929	4.45114	8.54e-06	7.28e-05	4278	4309	3096	3354	2037	2292	2590	2881
1591	ENSMUSG00000059834	Sclt1	protein_coding	613.174	-0.420794	0.0945974	-4.44826	8.66e-06	7.38e-05	703	617	503	428	714	717	534	724
1592	ENSMUSG00000022091	Sorbs3	protein_coding	198.182	-0.610437	0.137289	-4.44636	8.73e-06	7.44e-05	191	156	161	156	254	250	213	195
1593	ENSMUSG00000075284	Wipf1	protein_coding	246.977	-0.475746	0.10704	-4.44457	8.81e-06	7.5e-05	256	228	198	198	300	280	232	286
1594	ENSMUSG00000025889	Snca	protein_coding	1925.46	0.314091	0.0707142	4.4417	8.93e-06	7.59e-05	2605	2577	1924	2006	1601	1596	1709	1623
1595	ENSMUSG00000022305	Lrp12	protein_coding	1468.04	0.27142	0.061116	4.44106	8.95e-06	7.61e-05	1885	1953	1463	1540	1292	1312	1171	1300
1596	ENSMUSG00000097248	Gm2694	lincRNA	99.491	0.812626	0.183028	4.4399	9e-06	7.65e-05	177	154	89	127	63	64	76	72
1597	ENSMUSG00000001441	Npepps	protein_coding	3201.86	0.231398	0.0521428	4.43778	9.09e-06	7.71e-05	4516	3915	3050	3313	2948	2914	2461	2933
1598	ENSMUSG00000028434	Epb41l4b	protein_coding	392.144	-0.655244	0.147648	-4.43787	9.09e-06	7.71e-05	342	335	332	277	368	542	501	406
1599	ENSMUSG00000032586	Traip	protein_coding	284.084	-0.441989	0.099591	-4.43804	9.08e-06	7.71e-05	313	263	228	224	311	311	295	331
1600	ENSMUSG00000029922	Mkrn1	protein_coding	2963.26	0.320429	0.072212	4.43733	9.11e-06	7.72e-05	3836	4049	3049	3085	2461	2363	2592	2612
1601	ENSMUSG00000034614	Pik3ip1	protein_coding	388.343	0.396984	0.0894961	4.43577	9.17e-06	7.77e-05	576	479	422	407	343	310	290	337
1602	ENSMUSG00000032172	Olfm2	protein_coding	671.399	0.419436	0.0946022	4.43368	9.26e-06	7.84e-05	877	915	718	752	537	527	594	524
1603	ENSMUSG00000066568	Lsm14a	protein_coding	2908.71	-0.217439	0.0490555	-4.43251	9.31e-06	7.87e-05	3300	3227	2492	2467	3145	2944	2696	3159
1604	ENSMUSG00000062901	Klhl24	protein_coding	2481.01	0.305251	0.068871	4.43222	9.33e-06	7.88e-05	3551	3151	2537	2493	2227	2226	1699	2347
1605	ENSMUSG00000043639	Rbm20	protein_coding	46.8827	-1.10113	0.248499	-4.43112	9.37e-06	7.92e-05	33	30	31	32	72	64	42	67
1606	ENSMUSG00000033597	Caskin1	protein_coding	931.023	0.400831	0.0904858	4.42976	9.43e-06	7.96e-05	1563	1148	898	958	773	772	763	750
1607	ENSMUSG00000009418	Nav1	protein_coding	2395.51	0.444883	0.100456	4.42863	9.48e-06	8e-05	3891	2989	2403	2580	1860	2216	1463	2237
1608	ENSMUSG00000038539	Atf5	protein_coding	800.183	-0.438195	0.0989478	-4.42854	9.49e-06	8e-05	813	746	654	670	829	782	958	928
1609	ENSMUSG00000047013	Fbxo41	protein_coding	343.123	0.493213	0.111379	4.42825	9.5e-06	8e-05	519	498	353	352	267	235	294	289
1610	ENSMUSG00000029430	Ran	protein_coding	7871.46	-0.281365	0.0635415	-4.42806	9.51e-06	8e-05	8049	8750	6671	6744	8802	7824	7963	8338
1611	ENSMUSG00000032625	Thsd7a	protein_coding	2074.01	0.433316	0.0978768	4.42715	9.55e-06	8.03e-05	3064	2735	2124	2268	1789	1847	1190	1950
1612	ENSMUSG00000028358	Zfp618	protein_coding	1857.74	0.355084	0.0802383	4.42538	9.63e-06	8.1e-05	2531	2381	1877	2088	1645	1654	1205	1742
1613	ENSMUSG00000071415	Rpl23	protein_coding	4540.41	-0.267517	0.0604593	-4.42474	9.66e-06	8.11e-05	4716	5044	3835	3933	4739	4623	4522	5027
1614	ENSMUSG00000055013	Agap1	protein_coding	4645.87	0.297042	0.067144	4.42395	9.69e-06	8.14e-05	5715	6285	4751	5004	3887	4070	3638	4315
1615	ENSMUSG00000036564	Ndrg4	protein_coding	1842.72	0.293146	0.0662691	4.42358	9.71e-06	8.14e-05	2606	2503	1772	1826	1547	1559	1577	1626
1616	ENSMUSG00000045440	Insm2	protein_coding	318.444	-0.518572	0.117227	-4.42365	9.7e-06	8.14e-05	298	324	240	253	446	331	295	364
1617	ENSMUSG00000022033	Pbk	protein_coding	1523.88	-0.387611	0.0876588	-4.42182	9.79e-06	8.2e-05	1394	1693	1322	1191	1647	1639	1598	1697
1618	ENSMUSG00000033578	Tmem35a	protein_coding	789.065	0.351928	0.0795871	4.42192	9.78e-06	8.2e-05	1059	1078	764	874	634	655	663	688
1619	ENSMUSG00000053166	Cdh22	protein_coding	309.902	-0.56827	0.128511	-4.42195	9.78e-06	8.2e-05	254	303	239	258	340	340	388	336
1620	ENSMUSG00000041245	Wnk3	protein_coding	872.382	0.402802	0.0911179	4.42067	9.84e-06	8.23e-05	1263	1178	889	922	749	763	538	831
1621	ENSMUSG00000044117	2900011O08Rik	protein_coding	1102.92	0.361918	0.0818753	4.42035	9.85e-06	8.24e-05	1549	1549	1072	1145	920	864	975	913
1622	ENSMUSG00000040867	Begain	protein_coding	815.316	0.568744	0.12873	4.41812	9.96e-06	8.32e-05	1464	969	829	927	575	591	740	582
1623	ENSMUSG00000041491	Cep78	protein_coding	804.446	0.318172	0.0721059	4.41256	1.02e-05	8.53e-05	1192	1017	770	848	697	717	597	726
1624	ENSMUSG00000022364	Tbc1d31	protein_coding	449.138	-0.404151	0.0916088	-4.41171	1.03e-05	8.56e-05	485	451	373	342	473	547	423	511
1625	ENSMUSG00000023919	Cenpq	protein_coding	424.074	-0.408576	0.0926146	-4.41157	1.03e-05	8.56e-05	459	443	332	325	454	488	462	438
1626	ENSMUSG00000047003	Zfp41	protein_coding	2780.85	0.325996	0.0739167	4.41031	1.03e-05	8.59e-05	3451	3807	2887	2997	2588	2276	1994	2584
1627	ENSMUSG00000058756	Thra	protein_coding	5288.66	0.414696	0.0940275	4.41037	1.03e-05	8.59e-05	6874	7585	5595	5676	3949	4058	4836	4358
1628	ENSMUSG00000063445	Nmral1	protein_coding	1036.61	-0.333496	0.075617	-4.41033	1.03e-05	8.59e-05	1035	1119	861	883	1131	1076	1096	1098
1629	ENSMUSG00000030701	Plekhb1	protein_coding	195.178	-0.714996	0.162145	-4.40961	1.04e-05	8.61e-05	182	173	126	149	189	228	286	214
1630	ENSMUSG00000026193	Fn1	protein_coding	2209.64	-0.405652	0.0920229	-4.40816	1.04e-05	8.67e-05	2214	2150	1773	1927	2497	2710	1803	2642
1631	ENSMUSG00000040563	Plppr2	protein_coding	823.267	0.388703	0.0882077	4.40667	1.05e-05	8.72e-05	1210	1078	847	858	710	667	726	608
1632	ENSMUSG00000031824	6430548M08Rik	protein_coding	1275.1	0.403911	0.0917437	4.4026	1.07e-05	8.88e-05	1727	1726	1340	1391	1158	1043	1089	885
1633	ENSMUSG00000031714	Gab1	protein_coding	722.918	-0.321422	0.07304	-4.40063	1.08e-05	8.96e-05	758	787	601	594	818	737	718	791
1634	ENSMUSG00000055489	Ano5	protein_coding	77.1545	-0.909861	0.206998	-4.3955	1.11e-05	9.15e-05	68	53	43	64	118	104	70	94
1635	ENSMUSG00000037206	Islr	protein_coding	42.5337	-1.33997	0.30503	-4.39292	1.12e-05	9.26e-05	21	28	35	17	63	58	37	76
1636	ENSMUSG00000029563	Foxp2	protein_coding	249.251	0.539755	0.12288	4.39255	1.12e-05	9.27e-05	366	329	284	279	226	219	144	189
1637	ENSMUSG00000041540	Sox5	protein_coding	107.444	0.761019	0.173268	4.39215	1.12e-05	9.28e-05	163	179	118	120	76	85	53	92
1638	ENSMUSG00000031925	Maml2	protein_coding	392.546	0.443245	0.100923	4.39191	1.12e-05	9.28e-05	508	540	409	464	337	316	262	357
1639	ENSMUSG00000041840	Haus1	protein_coding	331.438	-0.441421	0.100565	-4.38942	1.14e-05	9.39e-05	335	340	276	247	390	352	362	350
1640	ENSMUSG00000042272	Sestd1	protein_coding	2195.95	0.315225	0.0718314	4.3884	1.14e-05	9.42e-05	3244	2902	2093	2223	1949	1971	1515	2058
1641	ENSMUSG00000064373	Selenop	protein_coding	334.63	-0.735445	0.167602	-4.38805	1.14e-05	9.43e-05	247	268	292	244	487	468	265	385
1642	ENSMUSG00000026234	Ncl	protein_coding	12548.9	-0.281807	0.0642463	-4.38635	1.15e-05	9.5e-05	12736	13653	10932	10752	13631	13105	11416	14490
1643	ENSMUSG00000028495	Rps6	protein_coding	3830.97	-0.292246	0.0666283	-4.38621	1.15e-05	9.5e-05	3837	4164	3216	3398	4293	3853	3850	4086
1644	ENSMUSG00000042225	Ammecr1	protein_coding	345.529	-0.507931	0.115811	-4.38584	1.16e-05	9.51e-05	352	328	265	272	420	452	284	399
1645	ENSMUSG00000020020	Usp44	protein_coding	147.977	-0.848954	0.193643	-4.38412	1.16e-05	9.57e-05	147	102	110	92	226	222	111	173
1646	ENSMUSG00000042766	Trim46	protein_coding	614.119	0.490059	0.111782	4.38407	1.16e-05	9.57e-05	1056	792	608	638	490	471	539	441
1647	ENSMUSG00000069793	Slfn9	protein_coding	262.262	-0.668996	0.152596	-4.3841	1.16e-05	9.57e-05	238	256	195	176	349	367	195	327
1648	ENSMUSG00000032245	Cln6	protein_coding	426.526	-0.466351	0.106406	-4.38274	1.17e-05	9.63e-05	373	408	354	375	498	458	464	463
1649	ENSMUSG00000025931	Paqr8	protein_coding	224.122	0.585564	0.133631	4.38195	1.18e-05	9.66e-05	330	305	212	299	195	152	172	164
1650	ENSMUSG00000031561	Tenm3	protein_coding	3931.21	0.44949	0.102591	4.38139	1.18e-05	9.68e-05	5238	5206	4101	4709	3556	3425	2223	3562
1651	ENSMUSG00000029385	Ccng2	protein_coding	2610.93	0.223902	0.0511389	4.3783	1.2e-05	9.81e-05	3588	3363	2530	2563	2313	2405	2109	2366
1652	ENSMUSG00000056258	Kcnq3	protein_coding	271.871	0.681364	0.155669	4.377	1.2e-05	9.86e-05	444	358	325	303	174	279	146	200
1653	ENSMUSG00000024600	Slc27a6	protein_coding	68.4363	-0.968265	0.221243	-4.37648	1.21e-05	9.87e-05	52	38	50	54	83	75	86	100
1654	ENSMUSG00000030111	A2m	protein_coding	277.59	0.525356	0.120037	4.3766	1.21e-05	9.87e-05	474	378	251	311	205	219	209	236
1655	ENSMUSG00000021676	Iqgap2	protein_coding	1030.08	-0.497255	0.113656	-4.37509	1.21e-05	9.93e-05	1035	927	771	895	1425	1142	815	1251
1656	ENSMUSG00000006517	Mvd	protein_coding	847.652	0.393255	0.0898955	4.37458	1.22e-05	9.95e-05	1151	1185	863	908	678	677	761	668
1657	ENSMUSG00000068394	Cep152	protein_coding	393.378	-0.437461	0.100035	-4.37308	1.23e-05	0.0001001	432	354	329	309	424	486	363	456
1658	ENSMUSG00000052310	Slc39a1	protein_coding	837.159	-0.381775	0.0873421	-4.37103	1.24e-05	0.000100987	829	871	738	650	1042	863	836	874
1659	ENSMUSG00000051517	Arhgef39	protein_coding	361.349	-0.431689	0.098786	-4.36994	1.24e-05	0.000101434	400	332	286	294	396	408	403	372
1660	ENSMUSG00000027386	Fbln7	protein_coding	39.2444	-1.34709	0.308334	-4.36894	1.25e-05	0.000101839	28	14	26	25	74	55	36	51
1661	ENSMUSG00000011179	Odc1	protein_coding	3932.13	-0.364927	0.0835445	-4.36806	1.25e-05	0.000102191	3595	4295	3366	3293	4506	3883	4035	4461
1662	ENSMUSG00000038605	Samd10	protein_coding	1038.82	0.317846	0.0727898	4.36663	1.26e-05	0.000102739	1362	1374	1065	1106	921	839	893	868
1663	ENSMUSG00000022051	Bnip3l	protein_coding	2665.28	0.221567	0.0507657	4.36451	1.27e-05	0.000103682	3467	3413	2603	2752	2404	2430	2176	2378
1664	ENSMUSG00000055723	Rras2	protein_coding	348.516	-0.465127	0.106575	-4.36431	1.28e-05	0.000103715	355	355	283	257	465	382	338	360
1665	ENSMUSG00000037896	Rcor1	protein_coding	1324.69	-0.307529	0.0704942	-4.36247	1.29e-05	0.000104531	1420	1362	1078	1179	1494	1349	1191	1570
1666	ENSMUSG00000031654	Cbln1	protein_coding	161.478	0.682753	0.156524	4.36197	1.29e-05	0.000104708	273	210	174	194	124	91	138	118
1667	ENSMUSG00000018819	Lsp1	protein_coding	137.426	0.653428	0.149825	4.36127	1.29e-05	0.000104984	208	171	164	169	111	93	108	94
1668	ENSMUSG00000027792	Bche	protein_coding	313.045	0.51683	0.118535	4.36015	1.3e-05	0.000105457	451	403	344	369	293	275	187	231
1669	ENSMUSG00000030671	Pde3b	protein_coding	826.356	-0.329177	0.0755303	-4.35822	1.31e-05	0.000106332	873	894	681	677	894	941	739	944
1670	ENSMUSG00000037572	Wdhd1	protein_coding	1229.98	-0.313201	0.0718821	-4.35714	1.32e-05	0.000106793	1404	1298	951	1044	1353	1371	1064	1429
1671	ENSMUSG00000036940	Kdm1a	protein_coding	3672.2	0.235917	0.0541514	4.35661	1.32e-05	0.000106989	4853	4720	3558	3816	3234	3126	3162	3328
1672	ENSMUSG00000028556	Dock7	protein_coding	4352.42	0.333336	0.0765515	4.35441	1.33e-05	0.00010801	6447	5408	4241	4679	3838	3910	2879	4131
1673	ENSMUSG00000014074	Rnf168	protein_coding	1043.24	-0.320794	0.0737009	-4.35264	1.35e-05	0.000108819	1050	1141	905	849	1145	1113	980	1187
1674	ENSMUSG00000040479	Dgkz	protein_coding	1593.95	-0.31469	0.0723046	-4.35228	1.35e-05	0.000108935	1817	1605	1361	1281	1702	1630	1748	1642
1675	ENSMUSG00000027996	Sfrp2	protein_coding	9181.23	1.05556	0.242539	4.35213	1.35e-05	0.000108946	14786	14478	11438	12051	8851	5219	4055	4821
1676	ENSMUSG00000056222	Spock1	protein_coding	3392.82	0.29606	0.0680472	4.3508	1.36e-05	0.000109547	4359	4540	3206	3822	3028	2747	2707	3143
1677	ENSMUSG00000025912	Mybl1	protein_coding	2828.33	0.402954	0.0926214	4.35055	1.36e-05	0.000109609	4566	3519	2963	2795	2369	2707	1811	2441
1678	ENSMUSG00000022865	Cxadr	protein_coding	2702.93	0.283532	0.0651769	4.35018	1.36e-05	0.000109663	3747	3573	2653	2731	2406	2424	1909	2593
1679	ENSMUSG00000036192	Rorb	protein_coding	6350.85	-0.265542	0.0610412	-4.35021	1.36e-05	0.000109663	7456	6805	5599	4835	6665	6557	6248	6976
1680	ENSMUSG00000000740	Rpl13	protein_coding	4048.12	-0.275879	0.0634234	-4.3498	1.36e-05	0.000109791	4395	4255	3383	3553	4427	3957	4285	4212
1681	ENSMUSG00000041420	Meis3	protein_coding	1501.81	0.403944	0.0928789	4.34915	1.37e-05	0.000110053	2434	1842	1430	1645	1256	1237	1300	1123
1682	ENSMUSG00000030057	Cnbp	protein_coding	6676.05	-0.261777	0.0602085	-4.34783	1.37e-05	0.000110652	6924	7467	5764	5670	7042	6919	6703	7081
1683	ENSMUSG00000058966	Fam57b	protein_coding	774.414	0.439882	0.101183	4.34737	1.38e-05	0.00011082	1174	1013	805	823	597	574	717	606
1684	ENSMUSG00000033545	Znrf1	protein_coding	1702.64	0.326215	0.07508	4.3449	1.39e-05	0.000112002	2689	2083	1555	1821	1513	1424	1333	1499
1685	ENSMUSG00000048899	Rimkla	protein_coding	555.102	0.350521	0.080676	4.34479	1.39e-05	0.000112002	760	767	540	594	505	466	400	495
1686	ENSMUSG00000029875	Ccdc184	protein_coding	299.594	0.481717	0.110962	4.34127	1.42e-05	0.000113679	405	443	313	328	243	228	254	226
1687	ENSMUSG00000036185	Sapcd1	protein_coding	286.835	-0.474379	0.109271	-4.3413	1.42e-05	0.000113679	280	262	254	221	319	326	312	312
1688	ENSMUSG00000046807	Lrrc75b	protein_coding	600.364	0.34429	0.0793576	4.33846	1.43e-05	0.00011508	803	808	612	640	479	518	487	532
1689	ENSMUSG00000074802	Gas2l3	protein_coding	713.803	-0.36455	0.084084	-4.33554	1.45e-05	0.000116549	777	715	558	613	808	833	608	827
1690	ENSMUSG00000032264	Zw10	protein_coding	870.236	-0.275444	0.0635551	-4.33395	1.46e-05	0.000117261	995	912	713	744	963	908	808	962
1691	ENSMUSG00000034098	Fstl5	protein_coding	250.457	0.582204	0.134333	4.33405	1.46e-05	0.000117261	307	412	281	277	181	210	164	211
1692	ENSMUSG00000031508	Ankrd10	protein_coding	1811.6	-0.293349	0.0676891	-4.33377	1.47e-05	0.000117285	2227	1758	1470	1517	1926	1805	1815	2065
1693	ENSMUSG00000025420	Katnal2	protein_coding	294.747	-0.434854	0.100366	-4.3327	1.47e-05	0.000117794	334	275	236	227	331	343	279	342
1694	ENSMUSG00000030805	Stx4a	protein_coding	266.672	-0.501078	0.115676	-4.33174	1.48e-05	0.00011824	271	235	200	232	280	338	280	292
1695	ENSMUSG00000102424	Paupar	lincRNA	207.934	0.537909	0.124227	4.33005	1.49e-05	0.000119079	349	262	221	225	183	172	136	158
1696	ENSMUSG00000015889	Lta4h	protein_coding	1101.91	-0.316916	0.0732103	-4.32884	1.5e-05	0.000119597	1150	1227	854	956	1201	1109	1142	1207
1697	ENSMUSG00000048039	Isg20l2	protein_coding	1184.68	-0.310656	0.0717625	-4.32895	1.5e-05	0.000119597	1237	1273	915	1079	1367	1204	1152	1284
1698	ENSMUSG00000025854	Fam20c	protein_coding	676.819	0.390994	0.0903265	4.32867	1.5e-05	0.000119605	926	876	696	768	536	547	601	541
1699	ENSMUSG00000041020	Map7d2	protein_coding	307.051	0.506268	0.11696	4.32858	1.5e-05	0.000119605	523	419	269	346	253	235	224	258
1700	ENSMUSG00000096257	Ccer2	protein_coding	259.396	0.604765	0.139748	4.32755	1.51e-05	0.000120096	339	350	301	330	187	160	221	213
1701	ENSMUSG00000047215	Rpl9	protein_coding	4721.6	-0.231915	0.0535956	-4.32712	1.51e-05	0.000120261	5112	5247	4029	4108	4867	4861	4664	5049
1702	ENSMUSG00000053641	Dennd4a	protein_coding	1201.67	-0.367804	0.0850054	-4.32683	1.51e-05	0.000120349	1245	1274	911	1045	1302	1481	1050	1346
1703	ENSMUSG00000028626	Col9a2	protein_coding	624.961	-0.428644	0.0991053	-4.32514	1.52e-05	0.000121208	709	580	456	534	790	752	545	659
1704	ENSMUSG00000022443	Myh9	protein_coding	1531.21	-0.358672	0.0829547	-4.32371	1.53e-05	0.000121923	1562	1474	1296	1352	1861	1721	1313	1692
1705	ENSMUSG00000010095	Slc3a2	protein_coding	1277.96	-0.349697	0.0808893	-4.32315	1.54e-05	0.000122163	1258	1386	1029	1103	1337	1281	1376	1458
1706	ENSMUSG00000029512	Ulk1	protein_coding	2101.38	0.260447	0.0602521	4.32262	1.54e-05	0.000122321	3048	2694	2037	2051	1982	1841	1705	1770
1707	ENSMUSG00000069135	Fgfr1op	protein_coding	689.383	-0.310443	0.0718399	-4.32132	1.55e-05	0.000122974	762	719	586	559	726	771	666	749
1708	ENSMUSG00000017132	Cyth1	protein_coding	720.748	0.358175	0.0828931	4.32092	1.55e-05	0.000123051	986	911	785	761	625	569	627	582
1709	ENSMUSG00000029674	Limk1	protein_coding	1829.17	0.313457	0.0725461	4.3208	1.55e-05	0.000123051	2355	2368	1937	1949	1728	1428	1527	1534
1710	ENSMUSG00000053128	Rnf26	protein_coding	289.198	-0.522328	0.120881	-4.321	1.55e-05	0.000123051	266	281	249	211	390	290	303	318
1711	ENSMUSG00000022416	Cacna1i	protein_coding	108.88	0.837238	0.193787	4.32041	1.56e-05	0.000123201	204	142	122	132	91	95	49	65
1712	ENSMUSG00000039774	Galnt12	protein_coding	39.9177	-1.57505	0.364725	-4.31845	1.57e-05	0.000124156	14	26	17	27	92	58	26	55
1713	ENSMUSG00000074457	S100a16	protein_coding	139.667	0.795134	0.184122	4.31852	1.57e-05	0.000124156	189	183	216	155	112	102	98	76
1714	ENSMUSG00000045438	Cox19	protein_coding	930.774	0.326123	0.0755535	4.31645	1.59e-05	0.000125217	1318	1177	917	1009	789	729	807	820
1715	ENSMUSG00000043168	4930426D05Rik	antisense	31.167	1.5478	0.358623	4.31594	1.59e-05	0.000125436	36	54	52	51	22	17	6	16
1716	ENSMUSG00000022428	Cby1	protein_coding	618.829	-0.431532	0.100025	-4.31424	1.6e-05	0.00012633	573	657	508	498	648	660	720	672
1717	ENSMUSG00000013275	Slc41a1	protein_coding	550.205	-0.385121	0.089331	-4.31117	1.62e-05	0.000128024	551	525	464	482	618	591	505	667
1718	ENSMUSG00000028902	Sf3a3	protein_coding	1837.08	-0.273261	0.0633943	-4.3105	1.63e-05	0.00012834	1897	1988	1593	1588	1980	1887	1829	1968
1719	ENSMUSG00000053644	Aldh7a1	protein_coding	916.18	-0.30409	0.0705499	-4.31028	1.63e-05	0.000128395	963	1005	777	750	1060	966	866	974
1720	ENSMUSG00000020436	Gabrg2	protein_coding	761.142	0.374623	0.0869396	4.309	1.64e-05	0.000129069	1089	1070	750	776	566	655	637	666
1721	ENSMUSG00000031756	Cenpn	protein_coding	346.705	-0.395602	0.0918288	-4.30804	1.65e-05	0.000129557	366	365	276	272	386	384	360	372
1722	ENSMUSG00000023008	Fmnl3	protein_coding	420.813	-0.395661	0.0918508	-4.30765	1.65e-05	0.000129711	495	382	328	349	478	485	416	446
1723	ENSMUSG00000030528	Blm	protein_coding	911.854	-0.336087	0.078029	-4.3072	1.65e-05	0.000129901	1070	933	738	715	1008	1007	793	1088
1724	ENSMUSG00000048915	Efna5	protein_coding	891.348	0.357746	0.0830689	4.30662	1.66e-05	0.00013017	1229	1089	946	992	821	791	589	790
1725	ENSMUSG00000034158	Lrrc58	protein_coding	1440.44	-0.304285	0.0706905	-4.30447	1.67e-05	0.000131366	1581	1466	1276	1166	1640	1516	1266	1668
1726	ENSMUSG00000029863	Casp2	protein_coding	1771.88	-0.226645	0.0526566	-4.30421	1.68e-05	0.000131391	2063	1864	1501	1543	1915	1839	1609	1937
1727	ENSMUSG00000045174	Amer3	protein_coding	377.076	0.396489	0.0921173	4.30418	1.68e-05	0.000131391	544	522	385	384	322	303	312	304
1728	ENSMUSG00000026192	Atic	protein_coding	1493.16	-0.386976	0.0899113	-4.30397	1.68e-05	0.000131437	1530	1334	1297	1309	1835	1590	1301	1754
1729	ENSMUSG00000002908	Kcnn1	protein_coding	458.389	0.378756	0.0880567	4.30127	1.7e-05	0.000132751	680	615	443	484	406	355	379	380
1730	ENSMUSG00000020886	Dlg4	protein_coding	1926.49	0.36218	0.0842027	4.30129	1.7e-05	0.000132751	2953	2604	1866	1906	1550	1649	1697	1513
1731	ENSMUSG00000030662	Ipo5	protein_coding	5016.84	-0.262582	0.0610444	-4.30148	1.7e-05	0.000132751	5330	5393	4169	4506	5867	5029	4605	5415
1732	ENSMUSG00000059791	Nrm	protein_coding	601.393	-0.40678	0.0946282	-4.29872	1.72e-05	0.000134211	604	636	456	508	746	613	652	601
1733	ENSMUSG00000027109	Sp3	protein_coding	2281.32	-0.255201	0.0593997	-4.29634	1.74e-05	0.000135583	2533	2492	1908	1945	2534	2311	2037	2612
1734	ENSMUSG00000020553	Pctp	protein_coding	179.759	-0.605987	0.141064	-4.29583	1.74e-05	0.00013582	141	169	140	151	224	186	199	217
1735	ENSMUSG00000062683	Atp5g2	protein_coding	913.886	-0.337543	0.0785789	-4.2956	1.74e-05	0.000135886	943	991	731	775	1000	928	996	959
1736	ENSMUSG00000027944	Hax1	protein_coding	689.612	-0.356619	0.0830534	-4.29386	1.76e-05	0.00013688	668	741	554	605	742	737	713	758
1737	ENSMUSG00000032435	Dync1li1	protein_coding	2103.28	0.268813	0.0626119	4.29331	1.76e-05	0.000137138	2947	2792	1939	2178	1852	1736	1761	1927
1738	ENSMUSG00000022208	Jph4	protein_coding	693.976	0.417594	0.097337	4.29019	1.79e-05	0.000138772	1133	914	640	735	552	541	596	573
1739	ENSMUSG00000035722	Abca7	protein_coding	514.416	0.555098	0.129384	4.2903	1.78e-05	0.000138772	1009	589	505	549	425	414	368	384
1740	ENSMUSG00000031785	Adgrg1	protein_coding	3844.3	0.292193	0.0681218	4.28928	1.79e-05	0.000139265	5119	4885	3649	4369	3494	3098	3270	3306
1741	ENSMUSG00000045294	Insig1	protein_coding	2516.09	0.271488	0.0633106	4.2882	1.8e-05	0.000139786	3385	3145	2525	2668	2108	2237	2186	2146
1742	ENSMUSG00000045671	Spred2	protein_coding	923.867	-0.300343	0.0700377	-4.2883	1.8e-05	0.000139786	969	1000	728	830	1028	985	891	987
1743	ENSMUSG00000028007	Snx7	protein_coding	87.3767	-0.876085	0.204363	-4.2869	1.81e-05	0.000140528	59	85	69	48	104	110	118	97
1744	ENSMUSG00000047181	Samd14	protein_coding	3748.59	0.275761	0.0643288	4.28674	1.81e-05	0.000140547	5125	4893	3794	3733	3311	3087	3334	3173
1745	ENSMUSG00000036503	Rnf13	protein_coding	771.829	-0.292365	0.0682284	-4.2851	1.83e-05	0.000141513	881	830	621	637	802	828	763	849
1746	ENSMUSG00000060126	Tpt1	protein_coding	14889.9	-0.268494	0.0626959	-4.28247	1.85e-05	0.000143113	15825	16191	12607	12859	15880	14427	15646	16007
1747	ENSMUSG00000026247	Ecel1	protein_coding	221.942	0.505932	0.118176	4.28118	1.86e-05	0.000143867	344	286	248	235	201	154	168	177
1748	ENSMUSG00000020787	P2rx1	protein_coding	90.6069	-0.833601	0.194731	-4.28079	1.86e-05	0.00014404	68	82	67	59	116	129	111	85
1749	ENSMUSG00000032733	Snx33	protein_coding	331.31	-0.480142	0.112173	-4.28038	1.87e-05	0.000144224	293	341	264	275	388	385	296	407
1750	ENSMUSG00000023942	Slc29a1	protein_coding	254.831	-0.603371	0.140983	-4.27973	1.87e-05	0.000144568	210	223	220	198	338	259	306	265
1751	ENSMUSG00000001419	Mef2d	protein_coding	1337.55	0.25525	0.0596479	4.27928	1.87e-05	0.000144777	1768	1675	1374	1380	1148	1189	1099	1213
1752	ENSMUSG00000039480	Nt5dc1	protein_coding	130.451	-0.593449	0.138715	-4.27817	1.88e-05	0.000145418	127	125	96	96	150	150	136	163
1753	ENSMUSG00000022253	Nadk2	protein_coding	1080.94	-0.307051	0.0718093	-4.27592	1.9e-05	0.000146815	1116	1208	907	887	1124	1138	1067	1231
1754	ENSMUSG00000090523	Gypc	protein_coding	193.538	-0.493967	0.115533	-4.27554	1.91e-05	0.000146984	208	188	140	152	225	216	193	231
1755	ENSMUSG00000000278	Scpep1	protein_coding	692.141	-0.338491	0.079208	-4.27345	1.92e-05	0.00014829	706	710	574	606	792	686	710	758
1756	ENSMUSG00000027506	Tpd52	protein_coding	2297.56	-0.327489	0.0766799	-4.27086	1.95e-05	0.000149935	2297	2556	1936	1881	2296	2480	2437	2520
1757	ENSMUSG00000034390	Cmip	protein_coding	3403.09	0.242233	0.056738	4.26933	1.96e-05	0.000150888	4457	4377	3428	3458	2985	2908	2965	3016
1758	ENSMUSG00000025474	Tubgcp2	protein_coding	1102.95	-0.270511	0.0633707	-4.2687	1.97e-05	0.000151226	1213	1143	928	972	1200	1180	1091	1126
1759	ENSMUSG00000032400	Zwilch	protein_coding	432.832	-0.398362	0.0933655	-4.26669	1.98e-05	0.000152511	513	391	336	358	509	477	396	501
1760	ENSMUSG00000001504	Irx2	protein_coding	1093.36	0.393463	0.0923039	4.2627	2.02e-05	0.000154921	1628	1496	964	1244	986	820	917	878
1761	ENSMUSG00000009681	Bcr	protein_coding	1709.23	0.256062	0.0600697	4.26275	2.02e-05	0.000154921	2251	2212	1616	1856	1517	1471	1394	1561
1762	ENSMUSG00000078591	Hs3st4	protein_coding	391.821	-1.14449	0.268477	-4.26291	2.02e-05	0.000154921	161	337	271	246	491	502	510	551
1763	ENSMUSG00000097391	Mirg	lincRNA	68.96	1.04705	0.245613	4.263	2.02e-05	0.000154921	155	97	75	77	27	50	49	45
1764	ENSMUSG00000053137	Mapk11	protein_coding	836.326	0.51696	0.121292	4.26212	2.02e-05	0.000155233	1555	996	764	944	713	681	647	581
1765	ENSMUSG00000032314	Etfa	protein_coding	992.352	-0.297552	0.0698295	-4.26111	2.03e-05	0.00015585	1028	1040	873	840	1057	1087	968	1060
1766	ENSMUSG00000023336	Wfdc1	protein_coding	99.4769	-2.34392	0.550196	-4.26015	2.04e-05	0.000156438	33	34	39	31	216	191	32	209
1767	ENSMUSG00000034275	Igsf9b	protein_coding	272.054	0.729801	0.1714	4.25789	2.06e-05	0.000157943	440	364	314	330	191	234	109	254
1768	ENSMUSG00000072235	Tuba1a	protein_coding	40122.3	0.32033	0.0752365	4.25764	2.07e-05	0.000158032	52381	54077	40141	43219	33128	31721	36309	34468
1769	ENSMUSG00000050912	Tmem123	protein_coding	1656.6	-0.375304	0.0881522	-4.25746	2.07e-05	0.00015807	1497	1868	1386	1365	1849	1704	1634	1955
1770	ENSMUSG00000041040	Fam117b	protein_coding	1849.59	0.291818	0.0685456	4.25729	2.07e-05	0.000158105	2413	2494	1743	2036	1600	1602	1400	1752
1771	ENSMUSG00000026988	Wdsub1	protein_coding	280.399	-0.438244	0.102956	-4.25661	2.08e-05	0.000158411	281	282	228	223	348	294	276	314
1772	ENSMUSG00000031586	Rbpms	protein_coding	2458.95	0.332653	0.0781478	4.25672	2.07e-05	0.000158411	3371	3409	2402	2549	2000	1891	2166	2225
1773	ENSMUSG00000008153	Clstn3	protein_coding	823.873	0.319197	0.0749955	4.25621	2.08e-05	0.000158608	1094	1092	811	901	698	658	684	754
1774	ENSMUSG00000026917	Wdr5	protein_coding	1678.5	-0.25971	0.0610281	-4.25558	2.09e-05	0.000158967	1760	1835	1409	1493	1819	1753	1622	1783
1775	ENSMUSG00000001435	Col18a1	protein_coding	1189.3	-0.934127	0.219532	-4.25509	2.09e-05	0.000159177	711	889	902	893	1918	1560	1065	1454
1776	ENSMUSG00000022474	Pmm1	protein_coding	824.185	-0.414992	0.0975323	-4.25492	2.09e-05	0.000159177	843	842	648	676	917	777	991	893
1777	ENSMUSG00000031209	Heph	protein_coding	879.695	-0.429418	0.10092	-4.25503	2.09e-05	0.000159177	823	902	703	751	1002	1110	738	1016
1778	ENSMUSG00000030744	Rps3	protein_coding	10765.1	-0.255775	0.0601372	-4.25319	2.11e-05	0.000160325	11431	11581	9206	9489	11636	10497	11082	11422
1779	ENSMUSG00000023411	Nfatc4	protein_coding	247.49	-0.574861	0.135202	-4.25188	2.12e-05	0.000161174	257	223	180	190	359	295	203	280
1780	ENSMUSG00000040771	Oard1	protein_coding	745.383	-0.351223	0.0826166	-4.25124	2.13e-05	0.000161547	727	828	625	606	823	785	773	803
1781	ENSMUSG00000027883	Gpsm2	protein_coding	1395.32	-0.294039	0.0691979	-4.24925	2.14e-05	0.000162897	1413	1453	1184	1264	1558	1446	1321	1542
1782	ENSMUSG00000001248	Gramd1a	protein_coding	2975.7	0.448288	0.105574	4.24621	2.17e-05	0.000165038	5527	3592	2788	2998	2452	2414	2393	2327
1783	ENSMUSG00000034384	Barhl2	protein_coding	982.542	0.538672	0.126867	4.24597	2.18e-05	0.000165123	1230	1493	1008	1208	635	683	843	881
1784	ENSMUSG00000052539	Magi3	protein_coding	884.7	-0.414926	0.0977337	-4.24548	2.18e-05	0.000165396	984	825	686	742	1019	1075	712	1071
1785	ENSMUSG00000041453	Rpl21	protein_coding	4550.97	-0.257459	0.0606508	-4.24494	2.19e-05	0.000165698	4921	4952	3763	4022	4653	4572	4717	4930
1786	ENSMUSG00000003352	Cacnb3	protein_coding	3151.52	0.301372	0.0710419	4.24217	2.21e-05	0.00016767	4607	3911	3138	3236	2710	2610	2827	2590
1787	ENSMUSG00000033854	Kcnk10	protein_coding	167.512	0.603011	0.142153	4.24198	2.22e-05	0.000167717	247	247	154	216	118	132	113	145
1788	ENSMUSG00000031565	Fgfr1	protein_coding	1117.91	-0.298543	0.0703845	-4.24161	2.22e-05	0.000167907	1245	1161	918	954	1363	1122	1060	1166
1789	ENSMUSG00000025026	Add3	protein_coding	1075.84	-0.288883	0.068117	-4.24098	2.23e-05	0.000168285	1155	1147	892	932	1235	1183	966	1138
1790	ENSMUSG00000014633	Cmc2	protein_coding	231.915	-0.495732	0.116909	-4.24031	2.23e-05	0.000168696	227	230	199	163	266	257	258	252
1791	ENSMUSG00000031103	Elf4	protein_coding	65.3464	-0.886245	0.20903	-4.23979	2.24e-05	0.000168997	42	61	45	46	78	82	74	89
1792	ENSMUSG00000024743	Syt7	protein_coding	791.679	0.335232	0.0790869	4.23878	2.25e-05	0.000169663	1197	1026	713	859	708	659	599	710
1793	ENSMUSG00000031292	Cdkl5	protein_coding	260.225	0.56175	0.132554	4.23789	2.26e-05	0.000170247	391	382	274	283	201	248	141	216
1794	ENSMUSG00000004366	Sst	protein_coding	129.466	0.747073	0.176316	4.23712	2.26e-05	0.000170659	215	168	144	165	123	66	91	89
1795	ENSMUSG00000005609	Ctr9	protein_coding	2403.81	0.208716	0.0492591	4.2371	2.26e-05	0.000170659	3175	3016	2359	2446	2226	2175	1881	2237
1796	ENSMUSG00000007589	Tinf2	protein_coding	497.88	-0.359029	0.0847633	-4.23567	2.28e-05	0.000171655	542	471	410	433	593	513	471	560
1797	ENSMUSG00000039976	Tbc1d16	protein_coding	3952.17	0.249768	0.0589767	4.23503	2.29e-05	0.000172051	4928	5186	4040	4099	3466	3581	3083	3656
1798	ENSMUSG00000042743	Sgtb	protein_coding	837.938	0.381121	0.0900398	4.23281	2.31e-05	0.000173665	1064	1160	893	911	660	731	585	806
1799	ENSMUSG00000037386	Rims2	protein_coding	810.924	0.378456	0.0894262	4.23205	2.32e-05	0.000174163	1175	1065	859	822	696	739	513	754
1800	ENSMUSG00000052369	Tmem106c	protein_coding	540.891	-0.344149	0.0813338	-4.23132	2.32e-05	0.000174636	580	552	462	436	592	565	575	572
1801	ENSMUSG00000057818	1600029O15Rik	transcribed_processed_pseudogene	207.59	0.509185	0.120358	4.23057	2.33e-05	0.000175121	314	291	204	236	172	186	139	158
1802	ENSMUSG00000021176	Efcab11	protein_coding	131.254	-0.890483	0.210514	-4.23004	2.34e-05	0.000175441	150	104	76	70	187	187	170	105
1803	ENSMUSG00000007617	Homer1	protein_coding	714.718	0.359491	0.0849895	4.22983	2.34e-05	0.000175505	1005	1035	714	695	648	619	493	637
1804	ENSMUSG00000005973	Rcn1	protein_coding	2065.53	-0.294475	0.0696607	-4.22728	2.37e-05	0.000177416	2045	2262	1771	1794	2352	2176	1948	2213
1805	ENSMUSG00000030560	Ctsc	protein_coding	168.786	-0.719785	0.170302	-4.22653	2.37e-05	0.000177907	115	156	132	133	230	210	142	223
1806	ENSMUSG00000022314	Rad21	protein_coding	6998.78	-0.236019	0.0558685	-4.22454	2.39e-05	0.000179298	7466	7894	6027	5986	7544	7360	6337	7685
1807	ENSMUSG00000031984	2810004N23Rik	protein_coding	469.521	-0.379691	0.0898776	-4.22454	2.39e-05	0.000179298	492	489	392	368	554	508	414	556
1808	ENSMUSG00000047407	Tgif1	protein_coding	421.628	-0.432143	0.102305	-4.22405	2.4e-05	0.000179589	417	365	358	376	450	483	417	496
1809	ENSMUSG00000030327	Necap1	protein_coding	975.261	0.265439	0.0628573	4.22289	2.41e-05	0.000180421	1292	1280	989	982	873	840	793	873
1810	ENSMUSG00000024897	Apba1	protein_coding	930.784	0.334649	0.0793072	4.21966	2.45e-05	0.000182927	1332	1280	864	979	742	770	767	860
1811	ENSMUSG00000036046	5031439G07Rik	protein_coding	3877.35	0.250085	0.0592891	4.21806	2.46e-05	0.000184128	5042	5026	3801	4084	3572	3128	3115	3710
1812	ENSMUSG00000025809	Itgb1	protein_coding	3452.53	-0.314475	0.0745879	-4.21616	2.48e-05	0.000185583	3421	3686	2930	3014	3991	3671	3005	3983
1813	ENSMUSG00000041417	Pik3r1	protein_coding	5223.1	0.382739	0.0909667	4.20746	2.58e-05	0.000192771	6848	7272	5684	5366	4176	5046	3365	4774
1814	ENSMUSG00000032518	Rpsa	protein_coding	6502.55	-0.303978	0.0722563	-4.20693	2.59e-05	0.000193115	6389	6885	5735	5625	7410	6399	6615	6972
1815	ENSMUSG00000020312	Shc2	protein_coding	1602.57	0.313559	0.074548	4.20613	2.6e-05	0.000193696	2476	2028	1445	1693	1419	1296	1287	1453
1816	ENSMUSG00000027447	Cst3	protein_coding	1491.84	-0.399118	0.0948964	-4.20583	2.6e-05	0.000193853	1459	1563	1208	1237	1618	1525	1796	1501
1817	ENSMUSG00000038517	Tbkbp1	protein_coding	311.509	0.498723	0.118597	4.20518	2.61e-05	0.000194303	542	372	310	345	278	228	235	245
1818	ENSMUSG00000032303	Chrna3	protein_coding	2374.56	0.278789	0.0663122	4.20418	2.62e-05	0.000195059	3327	2916	2275	2595	2306	1959	1937	1985
1819	ENSMUSG00000020841	Cpd	protein_coding	1349.83	-0.367293	0.0874053	-4.20218	2.64e-05	0.000196665	1329	1421	1117	1140	1507	1520	1136	1662
1820	ENSMUSG00000068744	Psrc1	protein_coding	398.402	-0.386346	0.0919415	-4.20209	2.64e-05	0.000196665	480	395	297	312	463	435	404	422
1821	ENSMUSG00000047344	Lancl3	protein_coding	118.818	0.710902	0.169201	4.20151	2.65e-05	0.00019706	210	162	117	146	89	96	60	101
1822	ENSMUSG00000034883	Lrr1	protein_coding	128.415	-0.688459	0.163981	-4.19842	2.69e-05	0.000199663	96	140	92	90	144	156	151	152
1823	ENSMUSG00000061607	Mdc1	protein_coding	2917.27	-0.327887	0.078115	-4.1975	2.7e-05	0.000200371	3208	2905	2459	2446	3373	3264	2380	3431
1824	ENSMUSG00000049502	Dtx3l	protein_coding	53.9859	-0.973922	0.232117	-4.19582	2.72e-05	0.000201749	34	47	37	36	66	63	59	85
1825	ENSMUSG00000000078	Klf6	protein_coding	992.343	-0.32595	0.0777628	-4.19159	2.77e-05	0.00020522	1036	1103	798	822	1086	982	946	1204
1826	ENSMUSG00000021259	Cyp46a1	protein_coding	293.712	-0.587166	0.14008	-4.19163	2.77e-05	0.00020522	361	236	208	206	336	371	353	281
1827	ENSMUSG00000036782	Klhl13	protein_coding	1320.03	0.288694	0.068884	4.19101	2.78e-05	0.000205636	1735	1807	1268	1391	1261	1084	1050	1142
1828	ENSMUSG00000020808	Pimreg	protein_coding	1170.03	-0.34917	0.0833178	-4.19082	2.78e-05	0.000205702	1167	1237	1003	963	1375	1178	1260	1178
1829	ENSMUSG00000047037	Nipa1	protein_coding	371.723	0.407933	0.0973528	4.19025	2.79e-05	0.000206105	552	514	349	405	315	311	255	342
1830	ENSMUSG00000073434	Wdr90	protein_coding	1185.9	-0.380526	0.0908499	-4.18852	2.81e-05	0.000207576	1498	1066	887	976	1401	1389	1126	1209
1831	ENSMUSG00000002308	Cd320	protein_coding	410.026	-0.380441	0.0908447	-4.18782	2.82e-05	0.000208107	416	433	343	325	436	430	430	471
1832	ENSMUSG00000056679	Gpr173	protein_coding	740.472	0.304321	0.0726723	4.18757	2.82e-05	0.000208222	985	986	744	775	622	617	611	676
1833	ENSMUSG00000026955	Sapcd2	protein_coding	543.759	-0.412791	0.0985929	-4.18682	2.83e-05	0.000208803	541	490	444	497	591	627	586	558
1834	ENSMUSG00000020612	Prkar1a	protein_coding	7625.29	0.202412	0.0483466	4.18668	2.83e-05	0.000208821	9897	9877	7419	7637	6847	6605	6347	7255
1835	ENSMUSG00000032783	Troap	protein_coding	344.227	-0.427268	0.10206	-4.18643	2.83e-05	0.000208936	399	326	253	280	410	335	373	388
1836	ENSMUSG00000020653	Klf11	protein_coding	474.67	0.333255	0.0796504	4.18397	2.86e-05	0.0002111	668	634	485	477	414	397	369	424
1837	ENSMUSG00000018451	6330403K07Rik	lincRNA	2521.66	0.281655	0.0673396	4.18261	2.88e-05	0.000212259	3351	3293	2523	2631	2136	2128	2250	2144
1838	ENSMUSG00000033705	Stard9	protein_coding	401.071	0.628551	0.150335	4.18101	2.9e-05	0.000213641	774	495	393	447	311	339	202	359
1839	ENSMUSG00000054027	Nt5dc3	protein_coding	435.675	0.360234	0.0862231	4.17793	2.94e-05	0.000216437	592	598	453	448	356	364	337	399
1840	ENSMUSG00000030619	Eed	protein_coding	954.193	-0.331293	0.0793241	-4.17645	2.96e-05	0.000217738	983	1060	806	754	1011	951	995	1095
1841	ENSMUSG00000021687	Scamp1	protein_coding	1693.8	0.262436	0.0628414	4.17616	2.96e-05	0.000217895	2278	2323	1685	1625	1484	1475	1348	1573
1842	ENSMUSG00000014602	Kif1a	protein_coding	8159.21	0.224921	0.0538731	4.17501	2.98e-05	0.000218867	11167	10410	7617	8437	7186	7501	6267	7798
1843	ENSMUSG00000020230	Prmt2	protein_coding	1940.43	0.312102	0.0747588	4.17479	2.98e-05	0.000218867	2645	2543	1973	2011	1638	1526	1755	1664
1844	ENSMUSG00000030683	Sez6l2	protein_coding	1301.38	0.384205	0.0920283	4.17486	2.98e-05	0.000218867	1912	1691	1284	1417	1068	977	1205	1037
1845	ENSMUSG00000067215	Usp51	protein_coding	85.3199	-0.742729	0.177953	-4.17373	3e-05	0.000219773	91	68	54	61	118	93	88	110
1846	ENSMUSG00000021366	Hivep1	protein_coding	2268.23	0.321916	0.0771721	4.1714	3.03e-05	0.000221913	2996	2899	2350	2470	2095	2016	1497	2117
1847	ENSMUSG00000035561	Aldh1b1	protein_coding	174.537	0.587111	0.140837	4.16871	3.06e-05	0.000224429	287	230	173	208	135	146	138	112
1848	ENSMUSG00000020493	Prr11	protein_coding	913.383	-0.375866	0.090178	-4.16804	3.07e-05	0.000224971	920	995	777	697	1066	1001	780	1105
1849	ENSMUSG00000063681	Crb1	protein_coding	491.554	-1.099	0.263783	-4.16631	3.1e-05	0.000226446	394	374	260	311	518	1019	459	567
1850	ENSMUSG00000036273	Lrrk2	protein_coding	85.4908	-0.79286	0.190337	-4.16557	3.11e-05	0.000227062	66	80	50	70	94	109	88	123
1851	ENSMUSG00000037071	Scd1	protein_coding	680.74	0.394889	0.0949122	4.16057	3.17e-05	0.000231902	893	935	679	783	491	599	550	599
1852	ENSMUSG00000078486	Perm1	protein_coding	146.637	0.687263	0.165187	4.16052	3.18e-05	0.000231902	292	170	151	168	103	112	102	112
1853	ENSMUSG00000024330	Col11a2	protein_coding	188.738	0.992327	0.238601	4.15895	3.2e-05	0.000233135	527	200	200	182	122	147	111	102
1854	ENSMUSG00000025582	Nptx1	protein_coding	495.098	0.372094	0.0894637	4.15916	3.19e-05	0.000233135	744	627	512	508	387	461	384	414
1855	ENSMUSG00000037605	Adgrl3	protein_coding	1186.03	0.431358	0.103715	4.15906	3.2e-05	0.000233135	1707	1593	1192	1328	1012	1048	677	1141
1856	ENSMUSG00000058267	Mrps14	protein_coding	678.454	-0.369705	0.088912	-4.1581	3.21e-05	0.000233874	687	748	565	524	713	709	753	735
1857	ENSMUSG00000033653	Vps8	protein_coding	1201.81	0.249511	0.0600158	4.15742	3.22e-05	0.000234451	1573	1557	1169	1268	1099	1050	951	1092
1858	ENSMUSG00000032101	Ddx25	protein_coding	560.217	0.351539	0.0845707	4.15674	3.23e-05	0.000235026	751	753	583	590	530	454	452	441
1859	ENSMUSG00000032352	Lrrc1	protein_coding	485.16	-0.361195	0.0869014	-4.15638	3.23e-05	0.000235278	502	486	425	392	554	554	469	504
1860	ENSMUSG00000025791	Pgm2	protein_coding	1393.7	0.316244	0.0761113	4.15502	3.25e-05	0.000236551	1794	1871	1394	1519	1218	1126	1221	1159
1861	ENSMUSG00000025008	Tctn3	protein_coding	334.558	-0.420192	0.101134	-4.15482	3.26e-05	0.000236638	333	311	271	298	409	356	327	369
1862	ENSMUSG00000053113	Socs3	protein_coding	286.571	-0.426295	0.102619	-4.15416	3.26e-05	0.000237197	309	268	216	249	329	297	308	318
1863	ENSMUSG00000030559	Rab38	protein_coding	38.9984	-3.28869	0.791841	-4.15322	3.28e-05	0.000238051	4	4	13	8	112	86	10	68
1864	ENSMUSG00000010205	Raver1	protein_coding	2094.79	-0.28255	0.0680344	-4.15305	3.28e-05	0.000238105	2277	2250	1730	1801	2473	2013	2117	2166
1865	ENSMUSG00000021303	Gng4	protein_coding	167.074	-0.600229	0.144558	-4.15217	3.29e-05	0.000238896	131	178	128	126	190	199	189	188
1866	ENSMUSG00000050896	Rtn4rl2	protein_coding	237.223	0.488978	0.117778	4.1517	3.3e-05	0.000239264	313	336	249	279	197	175	195	184
1867	ENSMUSG00000038370	Pcp4l1	protein_coding	163.195	-0.63038	0.151856	-4.15117	3.31e-05	0.000239695	130	184	108	124	200	183	191	181
1868	ENSMUSG00000021196	Pfkp	protein_coding	3796.86	1.14719	0.276439	4.14989	3.33e-05	0.000240864	10018	4283	3755	4845	2254	2538	1793	2458
1869	ENSMUSG00000022770	Dlg1	protein_coding	1040.73	-0.34813	0.0838905	-4.14981	3.33e-05	0.000240864	1166	999	879	859	1197	1126	874	1269
1870	ENSMUSG00000026029	Casp8	protein_coding	95.4306	-0.741014	0.178623	-4.14848	3.35e-05	0.000242149	80	94	56	75	117	135	98	106
1871	ENSMUSG00000046056	Sbsn	protein_coding	60.7621	1.02118	0.246226	4.14733	3.36e-05	0.000243236	115	93	71	71	24	33	50	45
1872	ENSMUSG00000007029	Vars	protein_coding	2502.16	-0.248197	0.0598662	-4.14587	3.39e-05	0.000244667	2927	2548	2037	2250	2816	2456	2489	2600
1873	ENSMUSG00000035835	Plppr3	protein_coding	4299.1	0.420272	0.101389	4.14516	3.4e-05	0.000245293	7537	5193	3958	4582	3661	3459	3658	3207
1874	ENSMUSG00000030802	Bckdk	protein_coding	781.945	-0.332363	0.0801897	-4.14471	3.4e-05	0.000245652	798	841	631	676	931	822	784	787
1875	ENSMUSG00000045039	Megf8	protein_coding	2387.27	0.232642	0.0561458	4.14354	3.42e-05	0.000246784	3377	2870	2298	2480	2131	2080	2033	2123
1876	ENSMUSG00000069729	Arid1b	protein_coding	3260.34	0.245736	0.0593156	4.14286	3.43e-05	0.000247386	4171	4178	3282	3420	3005	2876	2421	3106
1877	ENSMUSG00000022415	Syngr1	protein_coding	531.921	0.361821	0.0873497	4.14222	3.44e-05	0.000247953	725	719	539	569	415	433	455	469
1878	ENSMUSG00000055430	Nap1l5	protein_coding	289.391	0.497718	0.120164	4.14198	3.44e-05	0.000248081	398	419	301	326	205	238	253	215
1879	ENSMUSG00000053329	D10Jhu81e	protein_coding	586.486	-0.352539	0.0851284	-4.14126	3.45e-05	0.000248728	590	623	504	473	631	643	619	611
1880	ENSMUSG00000030753	Thap12	protein_coding	2912.41	-0.300022	0.0724747	-4.13968	3.48e-05	0.000250321	2819	3210	2573	2461	3193	3061	2820	3191
1881	ENSMUSG00000066705	Fxyd6	protein_coding	2626.72	-0.270452	0.06538	-4.13661	3.52e-05	0.000253558	2866	2798	2234	2243	2750	2638	2813	2727
1882	ENSMUSG00000059208	Hnrnpm	protein_coding	8209.4	-0.219349	0.0530339	-4.13602	3.53e-05	0.000254085	8929	9088	7135	7141	8998	7999	7872	8838
1883	ENSMUSG00000032297	Celf6	protein_coding	261.064	0.462932	0.111932	4.13584	3.54e-05	0.000254153	396	355	264	281	217	217	216	186
1884	ENSMUSG00000032411	Tfdp2	protein_coding	3255.24	-0.261348	0.0632524	-4.13182	3.6e-05	0.000258494	3507	3560	2764	2784	3570	3520	2807	3683
1885	ENSMUSG00000037568	Vash2	protein_coding	1524.55	0.285197	0.0690264	4.13171	3.6e-05	0.000258494	1981	1977	1579	1589	1231	1321	1235	1453
1886	ENSMUSG00000040331	Nsmce4a	protein_coding	1853.47	-0.292105	0.0707111	-4.13096	3.61e-05	0.000259198	1846	1988	1633	1596	2021	1900	1874	1981
1887	ENSMUSG00000029219	Slc10a4	protein_coding	269.28	0.597248	0.144595	4.13048	3.62e-05	0.000259608	466	370	287	274	226	173	240	175
1888	ENSMUSG00000024048	Myl12a	protein_coding	1009.2	-0.298663	0.0723211	-4.12969	3.63e-05	0.000260374	1064	1119	831	845	1097	1034	1058	1051
1889	ENSMUSG00000029703	Lrwd1	protein_coding	786.546	-0.353841	0.085705	-4.12859	3.65e-05	0.000261478	885	721	656	676	945	779	827	812
1890	ENSMUSG00000024613	Tcof1	protein_coding	1237.99	-0.268032	0.0649387	-4.12747	3.67e-05	0.000262625	1331	1308	1063	1077	1410	1264	1124	1371
1891	ENSMUSG00000027584	Oprl1	protein_coding	469.109	0.383607	0.0929646	4.12637	3.69e-05	0.000263744	714	628	480	459	415	343	369	428
1892	ENSMUSG00000066392	Nrxn3	protein_coding	517.537	0.38733	0.0938886	4.12542	3.7e-05	0.000264701	753	675	504	576	377	466	401	466
1893	ENSMUSG00000026429	Ube2t	protein_coding	277.541	-0.456361	0.110666	-4.12376	3.73e-05	0.000266481	295	292	189	227	325	273	302	325
1894	ENSMUSG00000056486	Chn1	protein_coding	1793.71	0.238223	0.0577715	4.12355	3.73e-05	0.000266591	2408	2421	1724	1761	1632	1568	1463	1619
1895	ENSMUSG00000026100	Mstn	protein_coding	1070.03	0.363889	0.0882611	4.12287	3.74e-05	0.000267235	1498	1508	1006	1149	786	944	835	1004
1896	ENSMUSG00000027635	Dsn1	protein_coding	494.729	-0.391055	0.0948764	-4.12173	3.76e-05	0.000268287	496	547	379	406	593	564	432	560
1897	ENSMUSG00000041084	Ostc	protein_coding	1463.22	-0.268522	0.0652249	-4.11687	3.84e-05	0.000273866	1584	1621	1234	1223	1639	1425	1467	1567
1898	ENSMUSG00000015968	Cacna1d	protein_coding	521.703	-0.556959	0.135366	-4.11445	3.88e-05	0.000276606	551	467	410	376	641	689	376	683
1899	ENSMUSG00000002393	Nr2f6	protein_coding	631.973	-0.435632	0.10589	-4.11403	3.89e-05	0.000276976	606	637	543	493	824	603	689	653
1900	ENSMUSG00000061578	Ksr2	protein_coding	317.096	0.520594	0.126565	4.11327	3.9e-05	0.000277747	441	394	367	380	253	252	183	310
1901	ENSMUSG00000021094	Dhrs7	protein_coding	79.0069	-0.920035	0.223724	-4.11236	3.92e-05	0.000278702	66	56	68	41	102	88	119	82
1902	ENSMUSG00000100832	Gm29260	lincRNA	46.7061	0.975401	0.237239	4.11148	3.93e-05	0.000279626	80	79	53	54	28	33	32	27
1903	ENSMUSG00000037138	Aff3	protein_coding	600.964	0.3723	0.0905769	4.11032	3.95e-05	0.000280887	746	842	630	662	485	501	451	562
1904	ENSMUSG00000021109	Hif1a	protein_coding	6530.6	-0.299161	0.0727891	-4.10997	3.96e-05	0.000281093	6516	7196	5727	5422	7006	7192	5792	7566
1905	ENSMUSG00000036781	Rps27l	protein_coding	642.524	-0.373465	0.0908692	-4.10991	3.96e-05	0.000281093	624	688	516	550	696	661	717	684
1906	ENSMUSG00000000275	Trim25	protein_coding	46.0474	-1.03305	0.251449	-4.1084	3.98e-05	0.000282645	31	30	32	34	65	67	55	48
1907	ENSMUSG00000020328	Nudcd2	protein_coding	980.096	-0.325738	0.0792848	-4.10845	3.98e-05	0.000282645	967	1034	856	831	1069	973	986	1129
1908	ENSMUSG00000021457	Syk	protein_coding	42.0137	-1.04058	0.253316	-4.10784	3.99e-05	0.000283188	34	29	22	32	50	62	44	60
1909	ENSMUSG00000042978	Sbk1	protein_coding	13578.7	0.304722	0.0742034	4.10658	4.02e-05	0.000284458	16615	19164	14102	13957	12216	11336	11569	11146
1910	ENSMUSG00000105366	Gm43719	TEC	51.9884	1.1166	0.271906	4.10657	4.02e-05	0.000284458	126	87	44	57	39	32	28	27
1911	ENSMUSG00000038623	Tm6sf1	protein_coding	89.0645	-0.766228	0.186594	-4.1064	4.02e-05	0.000284526	86	57	71	65	106	112	109	99
1912	ENSMUSG00000062937	Mtap	protein_coding	671.549	-0.436056	0.106195	-4.10618	4.02e-05	0.000284654	589	676	573	571	861	695	609	790
1913	ENSMUSG00000007080	Pole	protein_coding	1140.45	-0.493152	0.120181	-4.10342	4.07e-05	0.000287866	1358	948	889	864	1380	1508	887	1344
1914	ENSMUSG00000037211	Spry1	protein_coding	233.562	-0.565304	0.137766	-4.10335	4.07e-05	0.000287866	183	258	165	193	280	262	264	255
1915	ENSMUSG00000024666	Tmem138	protein_coding	452.406	-0.403617	0.0983927	-4.10211	4.09e-05	0.000289271	481	472	358	353	524	468	519	449
1916	ENSMUSG00000067288	Rps28	protein_coding	2223.29	-0.276732	0.0674781	-4.10106	4.11e-05	0.000290436	2432	2366	1783	1988	2320	2240	2378	2331
1917	ENSMUSG00000073705	Cenps	protein_coding	231.259	-0.523192	0.127585	-4.10073	4.12e-05	0.000290707	216	208	200	179	261	225	251	302
1918	ENSMUSG00000061983	Rps12	protein_coding	4356.73	-0.28126	0.0685967	-4.1002	4.13e-05	0.000291221	4579	4687	3710	3749	5009	4193	4528	4483
1919	ENSMUSG00000026113	Inpp4a	protein_coding	858.385	0.315422	0.0769382	4.09969	4.14e-05	0.000291716	1298	1053	828	901	720	697	711	789
1920	ENSMUSG00000027951	Adar	protein_coding	1221.54	0.298366	0.0727974	4.09858	4.16e-05	0.000292961	1732	1542	1168	1320	1131	1104	848	1111
1921	ENSMUSG00000027293	Ehd4	protein_coding	214.645	-0.496032	0.121029	-4.09846	4.16e-05	0.000292969	191	227	165	174	264	243	210	242
1922	ENSMUSG00000035798	Zdhhc17	protein_coding	1916.98	0.296048	0.0722402	4.09811	4.17e-05	0.000293262	2835	2420	1787	2024	1726	1727	1342	1793
1923	ENSMUSG00000024925	Rnaseh2c	protein_coding	386.764	-0.491692	0.119984	-4.09797	4.17e-05	0.000293295	368	401	299	301	437	343	441	501
1924	ENSMUSG00000005986	Ankrd13d	protein_coding	241.171	0.612471	0.149595	4.09419	4.24e-05	0.000297969	484	272	250	256	185	189	165	190
1925	ENSMUSG00000028163	Nfkb1	protein_coding	593.702	-0.310657	0.0759065	-4.09263	4.27e-05	0.000299826	664	623	481	497	682	630	534	668
1926	ENSMUSG00000008690	Ncaph2	protein_coding	2476.29	-0.261247	0.0638425	-4.09205	4.28e-05	0.00030043	2625	2745	2139	2082	2808	2482	2466	2539
1927	ENSMUSG00000024851	Pitpnm1	protein_coding	4591.8	-0.258138	0.0631747	-4.0861	4.39e-05	0.000308073	5445	4543	4038	3815	4849	4853	4730	4612
1928	ENSMUSG00000075266	Cenpw	protein_coding	203.859	-0.477958	0.117045	-4.08354	4.44e-05	0.000311335	234	193	146	158	233	214	218	241
1929	ENSMUSG00000040952	Rps19	protein_coding	3142.48	-0.279402	0.0684239	-4.0834	4.44e-05	0.000311369	3442	3330	2586	2740	3451	3102	3393	3165
1930	ENSMUSG00000040913	Fbxw4	protein_coding	188.013	-0.522778	0.128088	-4.08139	4.48e-05	0.000313914	178	157	153	164	210	215	197	222
1931	ENSMUSG00000005732	Ranbp1	protein_coding	3104.48	-0.287288	0.0703924	-4.08124	4.48e-05	0.000313962	3184	3356	2609	2729	3306	3010	3264	3416
1932	ENSMUSG00000025134	Alyref	protein_coding	1612.85	-0.296761	0.0727205	-4.08084	4.49e-05	0.000314334	1683	1766	1334	1380	1747	1565	1720	1738
1933	ENSMUSG00000036264	Fstl4	protein_coding	501.887	0.617602	0.151476	4.07724	4.56e-05	0.000319088	749	676	597	564	454	434	214	424
1934	ENSMUSG00000052544	St6galnac3	protein_coding	136.334	-0.711975	0.174649	-4.0766	4.57e-05	0.000319807	119	121	121	78	171	182	115	181
1935	ENSMUSG00000036766	Dner	protein_coding	1767.2	0.272376	0.0668189	4.07633	4.58e-05	0.000320011	2411	2343	1668	1849	1526	1486	1550	1533
1936	ENSMUSG00000034949	Zfr2	protein_coding	255.891	0.704795	0.17296	4.0749	4.6e-05	0.000321829	568	283	268	262	201	206	164	173
1937	ENSMUSG00000034292	Traf3ip1	protein_coding	508.737	-0.328504	0.0806408	-4.07367	4.63e-05	0.000323198	583	526	401	420	541	516	517	587
1938	ENSMUSG00000042444	Mindy2	protein_coding	1867.93	0.337254	0.0828263	4.07182	4.66e-05	0.000325619	2836	2444	1741	1947	1648	1662	1236	1779
1939	ENSMUSG00000004929	Thop1	protein_coding	713.467	-0.335477	0.0824049	-4.07108	4.68e-05	0.000326487	764	738	585	601	869	714	735	717
1940	ENSMUSG00000044533	Rps2	protein_coding	3630.99	-0.291079	0.0715031	-4.07085	4.68e-05	0.000326643	3674	3918	3050	3219	4139	3513	3748	3829
1941	ENSMUSG00000062760	1810041L15Rik	protein_coding	2068.13	0.218382	0.0536976	4.06689	4.76e-05	0.000332072	2837	2669	1954	2067	1927	1857	1604	1919
1942	ENSMUSG00000038718	Pbx3	protein_coding	1723.24	0.303658	0.0747175	4.06408	4.82e-05	0.000335933	2181	2368	1788	1768	1407	1457	1485	1522
1943	ENSMUSG00000024593	Megf10	protein_coding	624.449	0.469649	0.115582	4.06335	4.84e-05	0.000336827	860	922	625	692	397	506	531	556
1944	ENSMUSG00000031669	Gins3	protein_coding	279.115	-0.432213	0.10644	-4.06064	4.89e-05	0.000340417	288	287	204	236	335	301	253	338
1945	ENSMUSG00000025094	Slc18a2	protein_coding	1641.05	0.360953	0.0888993	4.06025	4.9e-05	0.000340488	2758	2039	1478	1700	1406	1469	1227	1386
1946	ENSMUSG00000027577	Chrna4	protein_coding	2234.74	0.242893	0.059819	4.06046	4.9e-05	0.000340488	2893	2913	2099	2424	2088	1942	1772	2014
1947	ENSMUSG00000061315	Naca	protein_coding	4826.83	-0.235841	0.0580855	-4.06024	4.9e-05	0.000340488	5165	5373	4207	4123	5178	4759	4814	5150
1948	ENSMUSG00000033676	Gabrb3	protein_coding	1229.82	0.300026	0.0739178	4.05892	4.93e-05	0.000342074	1655	1760	1183	1221	1067	1085	916	1146
1949	ENSMUSG00000034675	Dbn1	protein_coding	8786.79	0.22758	0.0560691	4.05892	4.93e-05	0.000342074	11946	10689	8468	9325	8281	7276	7554	7744
1950	ENSMUSG00000053477	Tcf4	protein_coding	3009.24	0.277303	0.0683259	4.05853	4.94e-05	0.000342479	4271	3773	2953	3109	2727	2684	2087	2922
1951	ENSMUSG00000057789	Bak1	protein_coding	315.066	-0.440562	0.108617	-4.05612	4.99e-05	0.000345855	315	335	241	250	406	327	331	320
1952	ENSMUSG00000021236	Entpd5	protein_coding	466.426	-0.355711	0.0877126	-4.05542	5e-05	0.000346715	512	484	377	376	545	542	413	503
1953	ENSMUSG00000055202	Zfp811	protein_coding	808.615	0.354004	0.0872984	4.0551	5.01e-05	0.000347018	1307	1002	797	801	735	717	566	699
1954	ENSMUSG00000044968	Napepld	protein_coding	278.47	0.50277	0.124008	4.05433	5.03e-05	0.000347992	369	408	310	303	247	257	167	211
1955	ENSMUSG00000008932	Slc1a7	protein_coding	115.736	0.95682	0.236013	4.0541	5.03e-05	0.000348159	176	200	139	137	39	95	95	68
1956	ENSMUSG00000030770	Parva	protein_coding	1729.71	-0.272043	0.0671273	-4.05264	5.06e-05	0.000350167	1890	1857	1472	1461	2043	1856	1511	1829
1957	ENSMUSG00000053646	Plxnb1	protein_coding	5274.51	0.302877	0.0747835	4.05006	5.12e-05	0.000353701	8398	6174	5088	5385	4666	4888	3988	4495
1958	ENSMUSG00000073792	Alg6	protein_coding	305.606	-0.416994	0.102959	-4.05008	5.12e-05	0.000353701	343	317	245	218	359	317	292	369
1959	ENSMUSG00000029521	Chek2	protein_coding	197.952	-0.53036	0.130981	-4.04912	5.14e-05	0.000354942	225	171	136	162	227	258	182	228
1960	ENSMUSG00000037563	Rps16	protein_coding	3390.78	-0.289747	0.071569	-4.0485	5.15e-05	0.000355711	3689	3706	2648	2984	3605	3284	3680	3625
1961	ENSMUSG00000020205	Phlda1	protein_coding	191.704	0.546276	0.13498	4.04708	5.19e-05	0.000357691	258	292	218	202	179	127	139	150
1962	ENSMUSG00000055670	Zzef1	protein_coding	1470.21	0.306658	0.0757795	4.04671	5.19e-05	0.000358081	2210	1789	1437	1532	1319	1370	1020	1322
1963	ENSMUSG00000000594	Gm2a	protein_coding	259.725	-0.443608	0.109739	-4.0424	5.29e-05	0.000364375	263	287	191	201	309	271	277	285
1964	ENSMUSG00000066043	Phactr4	protein_coding	1204.27	-0.264679	0.0654919	-4.04141	5.31e-05	0.000365732	1329	1280	1009	1046	1409	1227	1085	1304
1965	ENSMUSG00000068663	Clec16a	protein_coding	1051.74	0.257348	0.0636921	4.04049	5.33e-05	0.000366976	1436	1325	1059	1070	960	923	783	997
1966	ENSMUSG00000034903	Cobll1	protein_coding	63.7501	-0.969848	0.240056	-4.04009	5.34e-05	0.000367427	50	54	43	37	86	98	45	96
1967	ENSMUSG00000028476	Reck	protein_coding	294	-0.576923	0.142841	-4.03893	5.37e-05	0.00036899	395	223	199	205	351	368	295	332
1968	ENSMUSG00000033039	Micall1	protein_coding	926.646	0.278752	0.0690182	4.03882	5.37e-05	0.00036899	1220	1208	914	989	888	783	699	830
1969	ENSMUSG00000041355	Ssr2	protein_coding	1539.35	-0.280415	0.0694327	-4.03866	5.38e-05	0.00036899	1624	1648	1283	1357	1636	1572	1630	1588
1970	ENSMUSG00000063952	Brpf3	protein_coding	1115.39	-0.279731	0.0692637	-4.03863	5.38e-05	0.00036899	1365	1138	907	911	1293	1119	1032	1233
1971	ENSMUSG00000034647	Ankrd12	protein_coding	920.537	0.402137	0.0996037	4.03737	5.41e-05	0.000370803	1425	1210	947	920	752	865	567	856
1972	ENSMUSG00000039963	Ccdc40	protein_coding	386.395	0.427348	0.105863	4.03678	5.42e-05	0.000371538	601	543	351	414	356	289	310	303
1973	ENSMUSG00000031983	2310022B05Rik	protein_coding	1482.02	0.283595	0.0702693	4.03583	5.44e-05	0.000372868	1872	1934	1535	1572	1385	1220	1245	1244
1974	ENSMUSG00000061601	Pclo	protein_coding	1830.34	0.507805	0.125829	4.03568	5.44e-05	0.000372918	2903	2445	1894	1980	1386	1769	946	1706
1975	ENSMUSG00000031848	Lsm4	protein_coding	1118.79	-0.334786	0.0829667	-4.03519	5.46e-05	0.000373521	1187	1169	934	924	1193	1089	1272	1190
1976	ENSMUSG00000028551	Cdkn2c	protein_coding	454.752	-0.450389	0.111631	-4.03462	5.47e-05	0.000374247	406	490	370	364	458	498	529	510
1977	ENSMUSG00000024780	Cdc37l1	protein_coding	760.455	0.300621	0.0745401	4.03301	5.51e-05	0.000376449	1133	938	771	755	675	663	560	708
1978	ENSMUSG00000069911	Fam196b	protein_coding	66.3556	0.809704	0.200769	4.03302	5.51e-05	0.000376449	102	105	80	74	56	46	43	39
1979	ENSMUSG00000004843	Chmp2b	protein_coding	448.488	-0.383433	0.0951056	-4.03166	5.54e-05	0.000378432	425	488	367	374	541	480	427	491
1980	ENSMUSG00000029020	Mfn2	protein_coding	1596.64	0.264765	0.065685	4.03083	5.56e-05	0.000379585	1994	2060	1672	1673	1447	1323	1313	1448
1981	ENSMUSG00000027752	Exosc8	protein_coding	741.53	-0.272918	0.0677261	-4.02972	5.58e-05	0.000381186	845	794	600	632	794	809	692	804
1982	ENSMUSG00000055760	Gemin6	protein_coding	210.199	-0.502878	0.124828	-4.02856	5.61e-05	0.000382885	200	195	172	170	217	233	247	239
1983	ENSMUSG00000046997	Spsb4	protein_coding	1015.31	0.350672	0.0870775	4.02713	5.65e-05	0.00038504	1343	1321	1005	1170	977	786	842	796
1984	ENSMUSG00000026701	Prdx6	protein_coding	2427.3	-0.219731	0.0545751	-4.02622	5.67e-05	0.000386334	2746	2656	2062	2105	2730	2413	2342	2480
1985	ENSMUSG00000021067	Sav1	protein_coding	1048.91	-0.242137	0.0601843	-4.02325	5.74e-05	0.000390986	1171	1119	888	918	1120	1079	1020	1116
1986	ENSMUSG00000021273	Fdft1	protein_coding	3112.63	0.327232	0.0813368	4.02317	5.74e-05	0.000390986	4117	4185	3102	3360	2562	2544	2861	2519
1987	ENSMUSG00000031922	Cep57	protein_coding	1074.05	-0.278998	0.069458	-4.01679	5.9e-05	0.000401533	1256	1152	877	873	1113	1172	969	1248
1988	ENSMUSG00000020380	Rad50	protein_coding	568.127	-0.356575	0.088783	-4.01626	5.91e-05	0.000402233	578	608	472	464	595	665	512	666
1989	ENSMUSG00000034853	Acot11	protein_coding	65.005	-0.827247	0.205984	-4.01608	5.92e-05	0.000402346	61	45	46	47	76	90	79	71
1990	ENSMUSG00000055322	Tns1	protein_coding	290.844	0.604369	0.150705	4.01028	6.06e-05	0.000411959	419	414	332	330	304	203	144	237
1991	ENSMUSG00000022125	Cln5	protein_coding	377.378	-0.393771	0.0982173	-4.00918	6.09e-05	0.00041367	363	390	334	297	441	395	371	428
1992	ENSMUSG00000028051	Hcn3	protein_coding	391.284	0.397623	0.0992037	4.00815	6.12e-05	0.00041528	608	506	355	441	328	330	314	316
1993	ENSMUSG00000022437	Samm50	protein_coding	1250.31	-0.261711	0.0653046	-4.00754	6.14e-05	0.000416143	1387	1341	1007	1115	1326	1239	1281	1349
1994	ENSMUSG00000038775	Vill	protein_coding	42.5603	-1.0845	0.270732	-4.0058	6.18e-05	0.000419015	32	25	31	27	72	42	56	50
1995	ENSMUSG00000032399	Rpl4	protein_coding	14931.9	-0.234464	0.0585338	-4.00561	6.19e-05	0.000419152	15862	16417	12601	13455	16803	14615	14590	15576
1996	ENSMUSG00000026020	Nop58	protein_coding	2177.41	-0.232651	0.0581152	-4.00328	6.25e-05	0.000423106	2371	2408	1879	1871	2265	2178	2109	2422
1997	ENSMUSG00000040943	Tet2	protein_coding	728.653	0.499855	0.124878	4.00275	6.26e-05	0.000423836	1243	845	748	826	596	669	403	649
1998	ENSMUSG00000042078	Svop	protein_coding	917.139	0.371929	0.0929319	4.00217	6.28e-05	0.000424676	1267	1194	966	980	760	687	850	739
1999	ENSMUSG00000049047	Armcx3	protein_coding	1303.16	0.268659	0.0671417	4.00137	6.3e-05	0.000425913	1826	1706	1217	1353	1101	1192	998	1225
[truncated: 10,328 more rows]
