# Supplementary material for: Lhx2 is a progenitor-intrinsic modulator of Sonic Hedgehog signaling during early retinal neurogenesis
Source: eLife. 2022 Dec 2;11:e78342. doi: 10.7554/eLife.78342 (PMC9718532; doi:10.7554/eLife.78342)
Supplement: Supplementary file 3. [file elife-78342-supp3.xlsx]

## Sheet: qPCR
Supplemental Table 3: Statistics and tests for multiple pair-wise comparisons of qPCR-based measurements of gene expression
Notes:
RQ values used for graphing purposes only
Tests performed on DDCt values
Lhx2 CKO v Ctrl (E11.5 tam---E13.5 harvest)
Summary table for RQ values
Genes	Genotype	sample (n)	RQ (fold change)	SD	SEM	Figure location
Lhx2	Control	4				Fig. 1H
	CKO	4				Fig. 1H
Unpaired t test
P value	<0.0001
P value summary	****
Significantly different (P < 0.05)?	Yes
One- or two-tailed P value?	Two-tailed
t, df	t=11.36, df=6
Lhx2 CKO v Ctrl (E11.5 tam---E14.5 harvest)
Summary table for RQ values
Genes	Genotype	sample (n)	RQ (fold change)	SD	SEM	Figure location
Gli	Control	4	1.00345	0.0933883	0.0466942	Fig 1G
	CKO	6	0.206575	0.0402397	0.0164278	Fig 1G
Shh	Control	6	1.00261	0.0792214	0.032342	Fig 1G
	CKO	8	0.965594	0.321973	0.113835	Fig 1G
Vsx2	Control	4	1.02586	0.2732	0.1366	Fig 2C
	CKO	6	0.120632	0.0242726	0.00990925	Fig 2C
Ascl1	Control	4	1.01458	0.191689	0.0958444	Fig 2C
	CKO	6	0.542442	0.123587	0.0504542	Fig 2C
Sox2	Control	3	1.00302	0.0958149	0.0553187	Fig 2C
	CKO	4	0.589071	0.0919878	0.0459939	Fig 2C
Lhx2	Control	4	1.01558	0.19559	0.0977948	Fig 2C
	CKO	6	0.0159019	0.00666318	0.00272023	Fig 2C
Pax6	Control	3	1.03412	0.339183	0.195827	Fig 2C
	CKO	4	0.914789	0.184813	0.0924063	Fig 2C
Lin28b	Control	6	1.02091	0.242437	0.0989743	Fig 2C
	CKO	8	1.06392	0.272222	0.0962449	Fig 2C
Prtg	Control	6	1.00761	0.129546	0.0528868	Fig 2C
	CKO	8	0.993149	0.26323	0.093066	Fig 2C
Smo	Control	4	1.0056	0.12304	0.0615201	part of original analysis; not in figures
	CKO	6	0.74604	0.0698862	0.0285309	part of original analysis; not in figures
Gas1	Control	4	1.005	0.119	0.05952	part of original analysis; not in figures
	CKO	6	0.3943	0.03939	0.01608	part of original analysis; not in figures
Cdon	Control	4	1.011	0.1741	0.08704	part of original analysis; not in figures
	CKO	6	0.5237	0.1828	0.07462	part of original analysis; not in figures
Boc	Control	6	1.011	0.1641	0.06698	part of original analysis; not in figures
	CKO	8	1.128	0.2418	0.08549	part of original analysis; not in figures
Test name	Unpaired t test (multiple)
Variance assumption	Individual variance for each row
Multiple comparisons	Set P value threshold
Method	Holm-Šídák method
Alpha	0.05
Gene	Below threshold?	P-value	Mean Control (ddCt)	Mean CKO (ddCt)	Difference	SE of Difference	t ratio	df	Adjusted P-value
Gli1	Yes	<0.000001	0	2.298	-2.298	0.1539	14.93	8	5e-06
Shh	No	0.564909	0	0.1215	-0.1215	0.2053	0.5919	12	0.964164
Vsx2	Yes	<0.000001	0	3.077	-3.077	0.2125	14.48	8	6e-06
Ascl1	Yes	0.001565	-2.5e-05	0.911	-0.9111	0.1943	4.688	8	0.014002
Sox2	Yes	0.003073	0	0.7762	-0.7762	0.1452	5.346	5	0.021315
Lhx2	Yes	<0.000001	0	6.108	-6.108	0.3924	15.57	8	4e-06
Pax6	No	0.617975	0	0.1541	-0.1541	0.2901	0.5313	5	0.964164
Lin28b	No	0.816843	1.667e-05	-0.04559	0.0456	0.1926	0.2368	12	0.964164
Prtg	No	0.757368	0	0.05509	-0.05509	0.1743	0.3161	12	0.964164
Smo	Yes	0.002252	0	0.4278	-0.4278	0.09697	4.411	8	0.017874
Gas1	Yes	<0.000001	0	1.349	-1.349	0.09905	13.62	8	8e-06
Cdon	Yes	0.007294	0	1.009	-1.009	0.2827	3.57	8	0.042972
Boc	No	0.317064	1.667e-05	-0.1477	0.1477	0.1415	1.044	12	0.85144
Lhx2 CKO v Ptch1 CKO v Lhx2;Ptch2 dCKO v Ctrl (E11.5 tam---E15.5 harvest)
Summary table for RQ value of Hh pathway genes at E15.5
Gene	Genotype	sample (n)	RQ (fold change)	SD	SEM	Figure location
Gli1	Control	6	0.884	0.228	0.093	Fig. 6A
	Ptch1 CKO	9	1.086	0.347	0.116	Fig. 6A
	Lhx2 CKO	7	0.172	0.038	0.014	Fig. 6A
	dCKO	4	0.385	0.042	0.021	Fig. 6A
Ptch1	Control	6	1.1	0.284	0.116	Fig. 6A
	Ptch1 CKO	9	2.834	0.96	0.32	Fig. 6A
	Lhx2 CKO	7	0.67	0.133	0.05	Fig. 6A
	dCKO	4	3.07	1.07	0.535	Fig. 6A
Hhip	Control	6	0.876	0.215	0.088	Fig. 6A
	Ptch1 CKO	9	2.537	0.584	0.195	Fig. 6A
	Lhx2 CKO	7	0.702	0.146	0.055	Fig. 6A
	dCKO	4	1.719	0.156	0.079	Fig. 6A
Ptch2	Control	6	0.765	0.227	0.093	Fig. 6A
	Ptch1 CKO	9	1.28	0.51	0.17	Fig. 6A
	Lhx2 CKO	7	0.283	0.053	0.02	Fig. 6A
	dCKO	4	1.439	0.299	0.15	Fig. 6A
ANOVA summaries	Gli1	Ptch1	Hhip	Ptch2
F	66.1	38.18	40.84	27.48
P value	<0.0001	<0.0001	<0.0001	<0.0001
P value summary	****	****	****	****
Significant diff. among means (P < 0.05)?	Yes	Yes	Yes	Yes
R squared	0.9001	0.8389	0.8478	0.7893
Brown-Forsythe tests	Gli1	Ptch1	Hhip	Ptch2
F (DFn, DFd)	0.4930 (3, 22)	1.012 (3, 22)	0.4355 (3, 22)	0.9799 (3, 22)
P value	0.6908	0.406	0.7297	0.4202
P value summary	ns	ns	ns	ns
Are SDs significantly different (P < 0.05)?	No	No	No	No
Tukey's multiple comparisons tests	Gli1		Ptch1		Hhip		Ptch2
comparison	adj p-value	summary	adj p-value2	summary2	adj p-value4	summary4	adj p-value3	summary3
Ctrl vs. Ptch1 CKO	0.5893	ns	<0.0001	****	0.0893	ns	<0.0001	****
Ctrl vs. Lhx2 CKO	<0.0001	****	0.4237	ns	0.0003	***	0.0633	ns
Ctrl vs. dCKO	0.0009	***	0.0017	**	0.0403	*	0.0001	***
Ptch1 CKO vs. Lhx2 CKO	<0.0001	****	<0.0001	****	<0.0001	****	<0.0001	****
Ptch1 CKO vs. dCKO	<0.0001	****	0.1151	ns	0.8006	ns	0.9623	ns
Lhx2 CKO vs. dCKO	0.0005	***	<0.0001	****	<0.0001	****	<0.0001	****
Lhx2 CKO v Ctrl (E14.5 tam---E17.5 harvest)
Summary table for RQ values
Genes	Genotype	sample (n)	RQ (fold change)	SD	SEM	Figure Location
Lhx2	Control	3	0.843	0.15	0.0866025	Fig 9A
	CKO	4	0.012	0.003	0.0015	Fig 9A
Vsx2	Control	3	0.951	0.049	0.0282902	Fig 9A
	CKO	4	0.328	0.085	0.0425	Fig 9A
Gli1	Control	3	0.949	0.097	0.056003	Fig 9A
	CKO	4	0.517	0.116	0.058	Fig 9A
Ptch1	Control	3	0.806	0.183118	0.105723	Fig 9A
	CKO	4	0.583	0.115552	0.057776	Fig 9A
Ptch2	Control	3	0.94	0.053563	0.0309246	Fig 9A
	CKO	4	0.469	0.115622	0.0578108	Fig 9A
Hhip	Control	3	0.82	0.213449	0.123235	Fig 9A
	CKO	4	0.749	0.0787782	0.0393891	Fig 9A
Gli2	Control	3	0.889	0.0970429	0.0560278	Fig 9A
	CKO	4	0.563	0.0471381	0.023569	Fig 9A
Smo	Control	3	0.851	0.129085	0.0745274	Fig 9A
	CKO	4	0.565	0.0834706	0.0417353	Fig 9A
Test name	Unpaired t test (multiple)
Variance assumption	Individual variance for each row
Multiple comparisons	Set P value threshold
Method	Holm-Šídák method
Alpha	0.05
Gene	Below threshold?	P-value	Mean Control (ddCt)	Mean CKO (ddCt)	Difference	SE of Difference	t ratio	df	Adjusted P-value
Lhx2	Yes	3e-06	6.383	0.262	6.121	0.2706	22.62	5	2.5e-05
Vsx2	Yes	0.000911	1.646	0.074	1.572	0.2242	7.01	5	0.006357
Gli1	Yes	0.006992	0.9778	0.08033	0.8974	0.2037	4.405	5	0.027675
Ptch1	No	0.104515	0.8005	0.3347	0.4658	0.2352	1.98	5	0.198106
Ptch2	Yes	0.004493	1.127	0.09067	1.036	0.2116	4.895	5	0.022262
Hhip	No	0.661317	0.422	0.3227	0.09933	0.2135	0.4652	5	0.661317
Gli2	Yes	0.0014	0.8335	0.1757	0.6578	0.1031	6.381	5	0.008368
Smo	Yes	0.014846	0.8355	0.243	0.5925	0.1626	3.644	5	0.04388
Gli1 KO v Ctrl (E15.5)
Summary table for RQ values
Genes	Genotype	sample (n)	RQ (fold change)	SD	SEM	Figure location
Ptch1	Control	4	1.324	0.518	0.259	Fig 9B
	CKO	4	1.566	0.203	0.1015	Fig 9B
Ptch2	Control	4	1.351	0.718	0.359	Fig 9B
	CKO	4	1.828	0.339	0.1695	Fig 9B
Hhip	Control	4	1.506	0.501	0.2505	Fig 9B
	CKO	4	1.515	0.58	0.29	Fig 9B
Gli2	Control	4	1.188	0.397	0.1985	Fig 9B
	CKO	4	1.332	0.125	0.0625	Fig 9B
Smo	Control	4	1.155	0.285	0.1425	Fig 9B
	CKO	4	1.142	0.112	0.056	Fig 9B
Test name	Unpaired t test (multiple)
Variance assumption	Individual variance for each row
Multiple comparisons	Set P value threshold
Method	Holm-Šídák method
Alpha	0.05
Gene	Below threshold?	P-value	Mean Control (ddCt)	Mean CKO (ddCt)	Difference	SE of Difference	t ratio	df	Adjusted P-value
Ptch1	No	0.304285	-0.3313	-0.6378	0.3065	0.2729	1.123	6	0.765725
Ptch2	No	0.18916	-0.2998	-0.8505	0.5508	0.3719	1.481	6	0.64951
Hhip	No	0.979721	-0.532	-0.5225	-0.0095	0.3585	0.0265	6	0.998571
Gli2	No	0.381957	-0.1978	-0.4083	0.2105	0.2232	0.9433	6	0.765725
Smo	No	0.962197	-0.1783	-0.187	0.00875	0.1771	0.04941	6	0.998571
