# Supplementary figures and images for: Lhx2 is a progenitor-intrinsic modulator of Sonic Hedgehog signaling during early retinal neurogenesis
Source: eLife journal article supplement (doi:10.7554/elife.78342), 2022-11-10

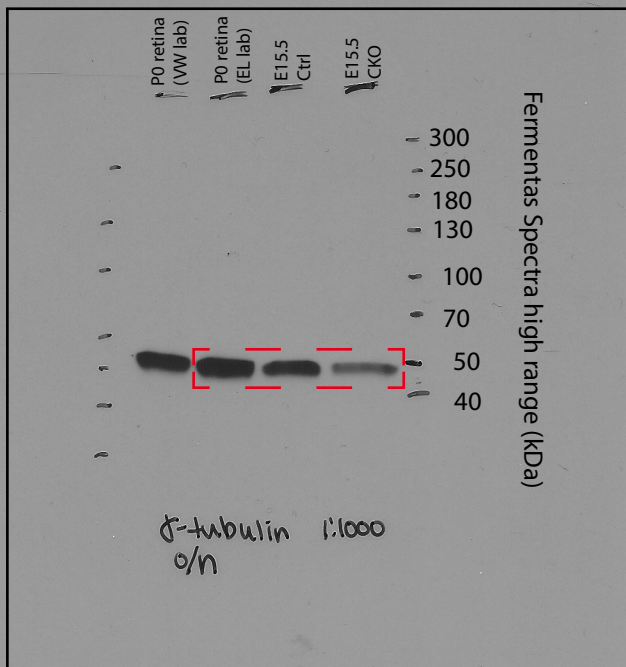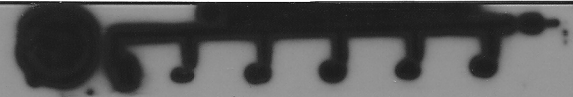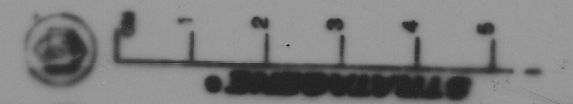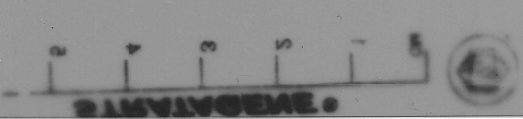

Supplement: fig1-data1 [file Gamma tubulin antibody_labeled.pdf › Figure 1-source data 1/Gamma tubulin antibody_labeled.pdf]

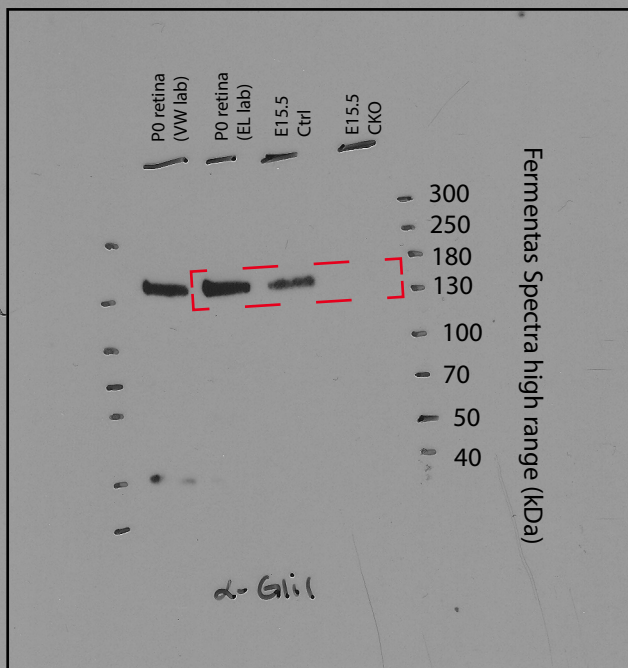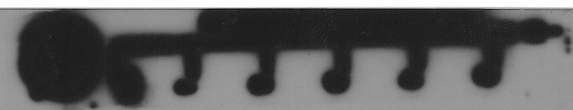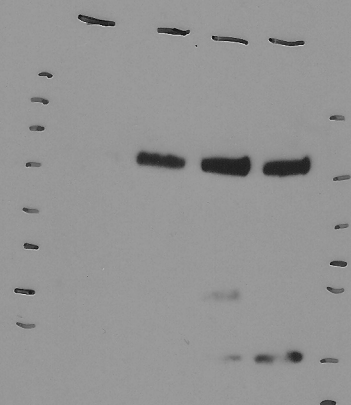

$\alpha$ -Gli1

$\alpha$ -Gli1

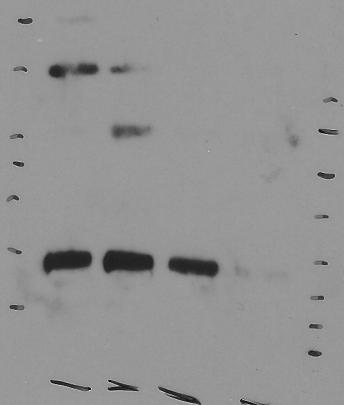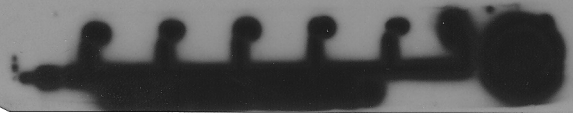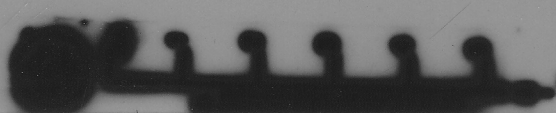

Supplement: fig1-data1 [file Gli1 antibody_labeled.pdf › Figure 1-source data 1/Gli1 antibody_labeled.pdf]

Invitrogen 1 Kb plus  
DNA ladder

**Ptch1 CKO**

**dCKO**

**Ctrl**

length (bp)  
1000  
850  
650  
500  
400  
300  
200  
100

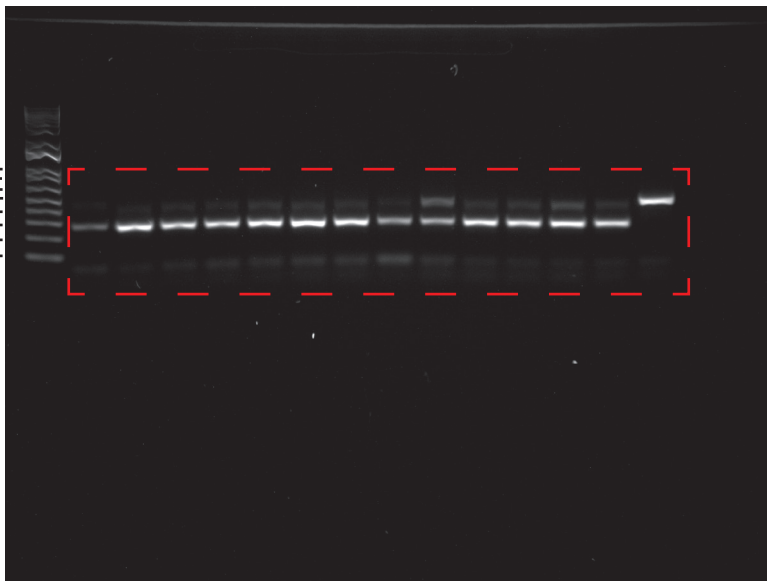

— flox (463 bp)  
— Δ (273 bp)

Supplement: fig6-figsupp1-data1 [file Ptch1 RTPCR_labeled.pdf › Figure 6-figure supplement 1-source data 1/Ptch1 RTPCR_labeled.pdf]
